# Supplementary material for: Motor impairment and its relationship to fitness in children
Source: PubMed Central journal article supplement — BMJ Open. 2013 Jul 11;3(7):e002909. doi: 10.1136/bmjopen-2013-002909 (PMC3710987; doi:10.1136/bmjopen-2013-002909), 2013-07-11
Supplement: bmjopen-2013-002909.draft_revisions.pdf [file bmjopen-2013-002909.draft_revisions.pdf]

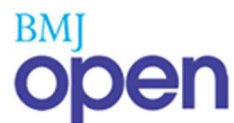

## Motor Competence and its relationship to fitness in children

|                                 |                                                                                                                                                                                                                                 |
|---------------------------------|---------------------------------------------------------------------------------------------------------------------------------------------------------------------------------------------------------------------------------|
| Journal:                        | <i>BMJ Open</i>                                                                                                                                                                                                                 |
| Manuscript ID:                  | bmjopen-2013-002909                                                                                                                                                                                                             |
| Article Type:                   | Research                                                                                                                                                                                                                        |
| Date Submitted by the Author:   | 19-Mar-2013                                                                                                                                                                                                                     |
| Complete List of Authors:       | Morris, Martyn; Oxford Brookes University, Sport and Health Sciences<br>Dawes, Helen; Oxford Brookes University, Sport and Health Science<br>Howells, Ken; Oxford Brookes University, Sport and Health Science<br>Janssen, Roel |
| <b>Primary Subject Heading</b>: | Paediatrics                                                                                                                                                                                                                     |
| Secondary Subject Heading:      | Paediatrics, Sports and exercise medicine                                                                                                                                                                                       |
| Keywords:                       | PAEDIATRICS, Muscle, Health, Motor competence                                                                                                                                                                                   |
|                                 |                                                                                                                                                                                                                                 |

SCHOLARONE™  
Manuscripts

Peer Review Only

1  
2  
3 1 **Motor Competence and its relationship to fitness in children**  
4  
5 2  
6  
7 3 Martyn Morris  
8  
9 4 Helen Dawes  
10  
11 5 Ken Howells  
12  
13 6 Roel Janssen  
14  
15  
16 7 **Corresponding author**  
17  
18 8 Dr. Martyn Morris  
19  
20 9 Department of Sport and Health Sciences  
21  
22 10 Oxford Brookes University  
23  
24 11 Headington Campus  
25  
26 12 Gipsy Lane  
27  
28 13 Oxford OX3 0BP  
29  
30 14 U.K.  
31  
32 15 mgmorris@brookes.ac.uk  
33  
34  
35  
36  
37  
38 17 **Key words:** Motor competence,  $\dot{V}O_2$  max, fitness, muscle  
39  
40 18 **Word count: 2621**  
41  
42  
43  
44  
45  
46  
47  
48  
49  
50  
51  
52  
53  
54  
55  
56  
57  
58  
59  
60

1  
2  
3 1 ARTICLE SUMMARY  
4

5 2 Article Focus  
6

- 7 • Exercise tolerance was not limited by the LMC group not willing to push  
8 themselves maximally, with the level of motor competence significantly  
9 related to VO<sub>2</sub> peak and muscular strength.  
10  
11  
12  
13 • Children with LMC have a reduced movement economy during cycling  
14 exercise.  
15

16  
17 8 Key Messages  
18

- 19 • Children with low motor competence fail to exercise hard enough to  
20 maximally tax the cardiovascular system.  
21  
22 • Children with LMC are willing to push themselves maximally during  
23 exercise, despite limited exercise capacity. Utilising short duration, high  
24 intensity exercise bouts, focusing on the development of the exercising  
25 musculature, may be a better method for improving the limited fitness  
26 parameters in this population.  
27  
28  
29  
30  
31

32 16 Strengths and Limitations  
33

- 34 • Few studies have directly measured limiting factors to exercise alongside  
35 standard motor competence tests.  
36  
37 • The use of cycle ergometry is a safer option for maximal testing, allowing  
38 participants to give a maximal effort. However, due to the nature of the  
39 exercise, the weakness in the exercising musculature may be accentuated.  
40  
41  
42  
43  
44  
45  
46  
47  
48  
49  
50  
51  
52  
53  
54  
55  
56  
57  
58  
59  
60

1  
2  
3 **Abstract**

4 **Background:** Children with movement impairments are known to perform poorly in  
5  
6  
7  
8  
9  
10  
11  
12  
13  
14  
15  
16  
17  
18  
19  
20  
21  
22  
23  
24  
25  
26  
27  
28  
29  
30  
31  
32  
33  
34  
35  
36  
37  
38  
39  
40  
41  
42  
43  
44  
45  
46  
47  
48  
49  
50  
51  
52  
53  
54  
55  
56  
57  
58  
59  
60  
exercise tests but the nature of the limiting factor is often unknown.

4 **Aim:** The aim of this work was to explore physiological and perceptual limits to  
5  
6  
7  
8  
9  
10  
11  
12  
13  
14  
15  
16  
17  
18  
19  
20  
21  
22  
23  
24  
25  
26  
27  
28  
29  
30  
31  
32  
33  
34  
35  
36  
37  
38  
39  
40  
41  
42  
43  
44  
45  
46  
47  
48  
49  
50  
51  
52  
53  
54  
55  
56  
57  
58  
59  
60  
exercise in children with varying degrees of motor competence, and the relationships  
to measures of health.

7 **Methods:** 35 boys aged 12-15yrs completed the Movement ABC test for the  
8  
9  
10  
11  
12  
13  
14  
15  
16  
17  
18  
19  
20  
21  
22  
23  
24  
25  
26  
27  
28  
29  
30  
31  
32  
33  
34  
35  
36  
37  
38  
39  
40  
41  
42  
43  
44  
45  
46  
47  
48  
49  
50  
51  
52  
53  
54  
55  
56  
57  
58  
59  
60  
assessment of motor competence, followed by an incremental cycle ergometer test to  
exhaustion for the assessment of maximal oxygen uptake ( $\dot{V}O_{2peak}$ ), respiratory  
exchange ratio (RER), heart rate (HR) and rating of perceived exertion (RPE).  
10 participants classified as having either high or low motor competence also  
performed a maximal isometric voluntary contraction (MVIC) for the assessment of  
lower limb extensor strength.

14 **Results:** 18 boys were classified as having lower motor competence. All but one  
15  
16  
17  
18  
19  
20  
21  
22  
23  
24  
25  
26  
27  
28  
29  
30  
31  
32  
33  
34  
35  
36  
37  
38  
39  
40  
41  
42  
43  
44  
45  
46  
47  
48  
49  
50  
51  
52  
53  
54  
55  
56  
57  
58  
59  
60  
participant met the criteria for maximum effort, both perceptually and physiologically,  
in the exercise test. There was a significant difference in  $\dot{V}O_2$  peak (34.9 v 48.5  
ml.kg.min<sup>-1</sup>),  $\dot{V}O_2$  workload (12.5 v 10.0ml.W), maximal heart rate (176 v 188  
beats.min<sup>-1</sup>), maximal oxygen pulse (12.1 v 15.9 ml.beat) and MVIC (5.7 v 9.1  
Nm.kg) between the low and high motor competent participants respectively. There  
was no significant difference in the RER or RPE between the groups.

21 **Conclusion:** When performing cycling ergometry, perceived exertion was not a  
22  
23  
24  
25  
26  
27  
28  
29  
30  
31  
32  
33  
34  
35  
36  
37  
38  
39  
40  
41  
42  
43  
44  
45  
46  
47  
48  
49  
50  
51  
52  
53  
54  
55  
56  
57  
58  
59  
60  
limiting factor in children with low motor competence. The lower heart rate at  
exercise cessation, coupled with reduced movement efficiency and lower muscle  
strength reported in this group, would suggest exercise is limited by impairment at the  
muscular level as evidenced by the high RER values despite low maximal heart rate

1  
2  
3 1 values attained during the exercise test and reduced maximal strength. Perception of  
4  
5 2 effort is not heightened in children with low motor competence and future exercise  
6  
7 3 interventions should be focused on improving muscular condition in participants with  
8  
9  
10 4 low motor competence to enable them to be better prepared to engage in physical  
11  
12 5 activity for health.  
13  
14  
15  
16  
17  
18  
19  
20  
21  
22  
23  
24  
25  
26  
27  
28  
29  
30  
31  
32  
33  
34  
35  
36  
37  
38  
39  
40  
41  
42  
43  
44  
45  
46  
47  
48  
49  
50  
51  
52  
53  
54  
55  
56  
57  
58  
59  
60

## 1 Introduction

2 Physical activity levels in childhood have been shown to predict adult activity  
3 behavior<sup>1,2</sup>, affecting life expectancy and quality of life years. As such, successfully  
4 achieving an active lifestyle in childhood is critical. Children with movement  
5 difficulties and poor coordination tend to have lower levels of physical activity  
6 participation than their typically developing peers<sup>3-5</sup>. Further, this group of children,  
7 with reduced motor coordination and low activity levels, have been found to have  
8 significantly higher metabolic syndrome indicators<sup>6</sup>, including: abdominal adiposity,  
9 blood pressure and triglyceride levels compared to their typically developing peers<sup>7</sup>  
10<sup>8</sup>. These findings are supported by evidence that these children are particularly at risk  
11 of developing secondary health disorders associated with physical inactivity<sup>4,9-11</sup>. Of  
12 added concern is that such motor impairments are known to persist into adulthood,  
13 further impacting on the ability of these individuals to achieve a physically active  
14 lifestyle as adults<sup>12-14</sup>. The number of people with some form of motor impairment in  
15 the UK population is 2.6 million<sup>15</sup> and as such this group is an important proportion  
16 of society who should be considered within public health policy. Understanding  
17 factors particularly affecting the exercise experience in these individuals is essential if  
18 higher physical activity levels are to be achieved.

19 In a series of interviews in adolescents with Developmental Coordination Disorder  
20 (DCD)<sup>16,17</sup> and in children with cerebral palsy<sup>18</sup>, exercise-induced symptoms of  
21 muscle fatigue, poor physical tolerance and low energy levels have also been  
22 reported as major factors reducing enjoyment, tolerance and participation. However,  
23 as yet, the underpinning physiological limits have not been fully explored. We know  
24 that individuals judge and limit effort during exercise from symptoms arising from  
25 muscles, joints and the cardiovascular system; choosing to reduce how hard they are

1  
2  
3 1 exercising when symptoms become too strong<sup>19 20</sup>. Children with reduced motor  
4  
5 2 competence are known to perform poorly in sport and exercise fitness screening tests<sup>9</sup>  
6  
7 3<sup>21</sup>, but the physiological and perceptual responses limiting exercise performance have  
8  
9 4 not been explored in these individuals<sup>9 22 23</sup>.

## 5 **Aims**

6 The study set out to explore, in individuals with different levels of motor competence,  
7  
8 physiological and perceptual measures during and limiting maximal exercise  
9  
10 performance.

## 11 **Methods**

### 12 *Procedure*

13 The study was approved by the University Research Ethics Committee (UREC).  
14  
15 Participants were recruited through two routes, either through a database of those who  
16  
17 had taken part in our previous research or through advertisements and posters.  
18  
19 Families indicating that they were interested in taking part were sent separate child  
20  
21 and parent information sheets and gave their written consent prior to the study.  
22  
23 Participants attended the Human Performance Laboratory for testing, with parents  
24  
25 attending only to help complete a health screening questionnaire for their child. The  
26  
27 testing session consisted of the participant completing the Movement ABC-2 Test  
28  
29 (MABC-2)<sup>24</sup> for a measure of motor competence, followed by the exercise testing.  
30  
31 Details of these measures can be found below. Participants were asked to refrain from  
32  
33 eating, performing exercise or drinking caffeine in the 2-hour period before attending  
34  
35 the sessions.  
36  
37  
38  
39  
40  
41  
42  
43  
44  
45  
46  
47  
48  
49  
50  
51  
52  
53  
54  
55  
56  
57  
58  
59  
60

1  
2  
3 1 *Participants*

4  
5 2 35 males aged 12 to 15 years with no known neurological condition were recruited.

6  
7 3 Individuals were classified on the level of motor ability using the Movement ABC-2  
8  
9 4 test.

10  
11 5 *Measures*

12  
13 6 Movement ABC-2 Test (MABC-2)<sup>24</sup>.

14  
15 7 This standardised test of motor skill was used to confirm the presence of significant  
16  
17 8 movement difficulties. Eight age appropriate items were individually administered as  
18  
19 9 described in the test manual. Raw scores for each task were converted to standard  
20  
21 10 scores, summed across three sub-sections to obtain a standard score for Manual  
22  
23 11 Dexterity, Aiming & Catching and Balance. A total test score and percentile rank was  
24  
25 12 also obtained. For the diagnosis of motor competence, it has been recommended that  
26  
27 13 scores below the 5<sup>th</sup> percentile indicate definite motor impairment while scores  
28  
29 14 between the 5<sup>th</sup> and 15<sup>th</sup> percentile indicate borderline scores<sup>25</sup>. Therefore, any child  
30  
31 15 scoring below the 15<sup>th</sup> percentile in this current study was classed as having low  
32  
33 16 motor competence

34  
35  
36  
37  
38 17 *Exercise testing*

39  
40 18 Height (Holtain stadiometer), weight (Seca scales) and body mass index (BMI) were  
41  
42 19 recorded prior to the exercise test. After resting for 6 minutes participants underwent  
43  
44 20 an incremental cycle ergometer exercise test (Lode Excalibur Sport, Gronigen,  
45  
46 21 Netherlands) of 1 minute stages after an initial 2 minutes of unloaded cycling.  
47  
48 22 Workload was progressed based on the Godfrey protocol<sup>26</sup> (increasing workload by  
49  
50 23 15-20 Watts from unloaded cycling based on the height of the participant). The test  
51  
52 24 ended at volitional exhaustion or if the participant was unable to maintain a cadence  
53  
54 25 of 60 rpm, with verbal encouragement given throughout.  
55  
56  
57  
58  
59  
60



1 Pulmonary gas exchange was measured breath-by-breath using an automated  
2 metabolic analysis system (Cortex Metalyzer, Leipzig Germany). The system was  
3 calibrated prior to each test in accordance with manufacturer's instructions. All  
4 participants wore a face mask covering the nose and mouth connected to a low-  
5 resistance volume transducer (Triple V, Hoechberg, Germany). Heart rate was  
6 recorded continuously throughout the testing protocol using short-range telemetry  
7 (Polar S810, Finland). Oxygen uptake ( $\dot{V}O_2$ ) was calculated as the average  $\dot{V}O_2$  in the  
8 last 30s of each stage, whilst  $\dot{V}O_2$  peak was recorded as the highest 60s average before  
9 the termination of the test. The respiratory exchange ratio (RER) was calculated from  
10 the ratio of  $\dot{V}CO_2$  to  $\dot{V}O_2$  at each workload level throughout the exercise test.

11 Maximal fat oxidation was calculated using the equations of Frayn<sup>27</sup> in equation 1  
12 below:

$$\text{Eq. 1 Fat oxidation (g.min)} = 1.67 \times \dot{V}O_2 - 1.67 \times \dot{V}CO_2$$

13  
14 The relationship between the amount of oxygen utilised for a given work rate was  
15 calculated from the linear slope of the relationship between  $\dot{V}O_2$  and Watts ( $\dot{V}O_2/W$ )  
16 and was used as a measure of muscular efficiency. Oxygen pulse, a non-invasive  
17 indicator of cardiac function, was calculated by dividing the  $\dot{V}O_2$  by heart rate  
18 ( $\dot{V}O_2/HR$ ). Maximum workload ( $Workload_{max}$ ) was calculated as the final completed  
19 workload. Rating of perceived exertion (RPE) was measured at the end of each stage  
20 using the Cart and Load scale (CALER), which has previously been used to assess  
21 children's perception of effort during exercise<sup>28</sup>. The CALER has a scale from 1 to  
22 10 with 1 being classed as 'very easy' and 10 being 'so hard I'm going to stop'.  
23 Illustrations of a child pulling a cart behind their bicycle, which was progressively  
24 laden with bricks, accompanied the scale.

1  
2  
3 1 The criteria for true maximal effort included a plateau in  $\dot{V}O_2$  max, maximal heart rate  
4  
5 2  $\geq 95\%$  of age predicted maximum and RER  $>1.06$ <sup>29</sup>. All children were fully  
6  
7 3 familiaried with the testing protocol prior to commencing the session.  
8  
9  
10 4

#### 11 5 MVIC Protocol

12 6 Participants performed a 1RM leg extensor strength test on a specially designed  
13  
14 7 isometric strength-testing chair. The knee angle was  $90^0$  and the rotation axis of the  
15  
16 8 strength chair was aligned with the knee axis. Participants were asked to relax for 30  
17  
18 9 seconds, thereafter subjects performed maximum knee extension for approximately 5  
19  
20 10 seconds. Verbal encouragement was given to reach the maximum force. After this  
21  
22 11 maximum knee extension subjects relaxed for 30 seconds. This test was repeated three  
23  
24 12 times, 1RM was the maximum output reached.

25  
26 13 Electrical signals from the torque transducer were amplified (Digitimer Neurolog  
27  
28 14 NL107 Recorder Amplifier) and digitised (Cambridge Electronic Design, micro1401).  
29  
30 15 Torque from maximal voluntary contractions (MVIC) was recorded on a PC for  
31  
32 16 subsequent analysis using Spike data analysis software (Spike 2 Version 5.0 for  
33  
34 17 Windows).

#### 35 18 Data Analysis

36 19 Descriptive statistics (mean +/- SD, range) were calculated for all variables.  
37  
38 20 All exercise testing measure distributions were examined for normality. Linear  
39  
40 21 regression analysis was performed to examine relationships between M-ABC score  
41  
42 22 and the exercise variables. 10 participants reporting low motor competence returned  
43  
44 23 to the laboratory to repeat the exercise test to establish reliability data in this  
45  
46 24 population. Test re-test reliability was analysed to test for systematic and random  
47  
48 25 error using student t-test, intraclass correlation coefficient (ICC) [3,1], bias (average  
49  
50  
51  
52  
53  
54  
55  
56  
57  
58  
59  
60

1 difference) and random error (1.96 x SD of differences). Statistical significance was  
2 accepted at  $p < 0.05$ .

## 3 4 **Results**

### 5 6 7 *Movement ABC-2 Test*

8 18 participants obtained total scores considered to be LMC, i.e. below the ABC 15<sup>th</sup>  
9 percentile, with 5 at or below the 5<sup>th</sup>.

10

11 As expected, there was a significant difference in the Movement ABC percentile score  
12 between the LMC and HMC group (4.0 (4.7) v 62.8 (20.7),  $p < 0.05$ ).

13

### 14 *Exercise Testing*

15 There was a significant difference in  $\dot{V}O_2$  peak (34.9 (6.3) v 48.5 (7.9) ml.kg.min<sup>-1</sup>),  
16  $\dot{V}O_2$ /workload (12.5 (3.9) v 10.0 (1.3)  $\dot{V}O_2$ /W), oxygen pulse (12.1 (3.7) v 15.9 (4.0)  
17 ml.beat), maximum heart rate (176 (19.7) v 188 (8.8) beats.min) and MVIC (5.7 (1.0)  
18 v 9.0 (1.8) Nm.kg) with the HMC groups achieving higher  $\dot{V}O_2$ , oxygen pulse,  
19 maximum heart rate and MVIC.

20 There was no difference between the groups in the respiratory exchange ratio (RER),  
21 with all but one participant demonstrating a maximal value greater than 1.0 at the end  
22 of the test. There was also no significant difference in maximal fat oxidation levels  
23 between the groups.

24 Compared to established maximal criteria for typically developing children<sup>30</sup> all but  
25 one of the participants met the criteria for a maximal effort during the exercise test,  
26 with no significant difference between the LMC and HMC groups. There was no  
27 difference in the perception of effort throughout the exercise trial and at exercise

1  
2  
3 1 termination, with all participants reporting an RPE rating of 9 or 10 at the end of the  
4  
5 2 test, despite individuals in the LMC group having significantly lower maximum HR  
6  
7 3 values at the end of the cycle ergometer test.  
8  
9  
10 4

11  
12 5 There were significant relationships between the MABC score and  $\dot{V}O_2$  peak ( $r = 0.36$ ,  
13  
14 6  $p < 0.05$ ) (figure 1) and MVIC ( $r = 0.76$ ,  $p < 0.01$ ) (figure 2).  
15  
16  
17 7

18 8  
19  
20  
21 9 Figure 1. Relationship between M-ABC score and  $\dot{V}O_2$  peak.  
22

23 10  
24  
25 11  
26  
27 12 Figure 2. Relationship between M-ABC score and MVIC.  
28

### 29 13 30 14 *Test re-test reliability of exercise measures*

31  
32  
33 15 10 LMC participants returned to the laboratory to complete a second maximal  
34  
35 16 exercise test for the assessment of reliability in this population. The maximal exercise  
36  
37 17 data demonstrated good reliability with ICC scores for  $\dot{V}O_2$  peak 0.75 (CI 0.23-0.94; t  
38  
39 18 0.39, bias 3.54, random error 6.93), maximal heart rate 0.93 (CI 0.73-0.98; t -0.86,  
40  
41 19 bias 7.8, random error 15.4) and maximal RER 0.89 (CI 0.59-0.98; t -0.14, bias 0.07,  
42  
43 20 random error 0.14). Maximal RPE ICC scores were all rated 9-10 thus affecting the  
44  
45 21 ICC 0.05 (CI -0.60-0.66), but had a low bias (t -2.14, bias 0.86, random error 1.68).  
46  
47  
48 22

### 49 23 **Discussion**

50  
51  
52  
53 24 The study set out to explore, in individuals with different levels of motor competence,  
54  
55 25 physiological and perceptual factors during and limiting maximal exercise  
56  
57 26 performance. When considering limits to exercise in people with low motor  
58  
59  
60

1  
2  
3 1 competence, symptoms of perceived exertion were limiting individuals underpinned  
4  
5 2 by typical maximal RER and fat oxidation levels at test termination, suggesting low  
6  
7 3 levels of aerobic muscle performance. Examination of the exercise test data showed a  
8  
9  
10 4 significant difference in  $\dot{V}O_2$  peak,  $\dot{V}O_2$  / workload, oxygen pulse, maximum heart rate  
11  
12 5 and MVIC between the LMC and HMC group. Furthermore, individuals with lower  
13  
14 6 motor competence had both a lower exercise capacity and lower muscle strength.  
15  
16 7 These findings together are important as they highlight a low level of aerobic muscle  
17  
18 8 performance as a factor limiting exercise performance in children with poor  
19  
20 9 coordination and a number of changes in health indicators in children with low motor  
21  
22 10 competence which, if left unaddressed, is likely to continue into adulthood and  
23  
24 11 contribute to the development of metabolic disorders in this population.  
25  
26  
27  
28  
29

30 13 Despite children with LMC demonstrating a linear  $\dot{V}O_2$  / workload response, the  
31  
32 14 value of 12.5 (3.9) ml.W reflects a reduced movement economy throughout the  
33  
34 15 exercise<sup>31</sup>.  $\dot{V}O_2$  normally raises at a rate of about 8.5-11ml.min.watt and is  
35  
36 16 independent of sex, age, body weight or height<sup>32</sup>. Thus, in children with LMC,  
37  
38 17 exercise participation may be limited by the impaired ability of the muscle to work  
39  
40 18 aerobically. The reduced muscular strength of the quadriceps reported in this study  
41  
42 19 further supports the main limiting factor being at the muscular level and this finding  
43  
44 20 supports the findings from previous studies citing a reduced strength in other muscle  
45  
46 21 groups in children with poor motor competence<sup>33</sup>.  
47  
48  
49  
50  
51  
52

53 23 In comparison to the HMC group, the LMC group had a reduced exercise capacity,  
54  
55 24 with a mean  $\dot{V}O_2$  peak of 34.9 ml.kg.min<sup>-1</sup>. The  $\dot{V}O_2$  peak was below the cardiovascular  
56  
57 25 fitness threshold in the LMC children<sup>34</sup> and as such associated with an increased risk  
58  
59  
60

1 of obesity, Type II diabetes and cardiovascular and metabolic disorders in adulthood  
2  
3  
4  
5 35. Considered alongside the low maximum heart rates demonstrated by these  
6  
7 children (mean 176 beats.min<sup>-1</sup>) in comparison to HMC participants (188 beats.min<sup>-1</sup>)  
8  
9 and those reported in normal healthy children at the end of a similar cycling protocol  
10  
11 36, our findings suggest that a low level of aerobic muscle performance was limiting  
12  
13 the ability of children with LMC to push themselves hard enough to maximally tax  
14  
15 the cardiovascular system. Despite a significantly lower oxygen pulse level between  
16  
17 the groups (12.1 (3.7) v 15.9 (4.0)ml.beat, p<0.05), the LMC group was not different  
18  
19 to those in healthy individuals reported previously<sup>37</sup>. This further supports the  
20  
21 findings that the limiting factor is of peripheral, and not central, origin. Given the  
22  
23 emerging role of mitochondrial dysfunction in many neuromuscular disorders, a lack  
24  
25 of aerobic capability in the muscles of children with poor motor control may impact  
26  
27 on their long-term health and may prevent them from increasing heart rate to the level  
28  
29 required to achieve an aerobic training stimulus and attain fitness, health and  
30  
31 wellbeing benefits according to current guidelines for physical activity in children<sup>38</sup>.  
32  
33 Interestingly, despite the reduced aerobic fitness there was no difference in the  
34  
35 utilisation of fat as a substrate during the exercise protocol between the groups in this  
36  
37 study (0.56 (0.28) v 0.72 (0.36)g.min, p>0.05) for LMC and HMC respectively. The  
38  
39 levels of fat oxidation in this current study were within the range previously reported  
40  
41 in healthy participants of similar age<sup>39</sup>. The number of individuals in this sample is  
42  
43 relatively small, however we included a range of individuals with different motor  
44  
45 capabilities and in the sub group of LMC participants that returned to the laboratory  
46  
47 we established good reliability in the clinical exercise testing in this population.  
48  
49 Muscle function has been found to have an important role in long term health<sup>40</sup> and  
50  
51 considering our observation of reduced muscle capacity in individuals with LMC, it is  
52  
53  
54  
55  
56  
57  
58  
59  
60

1  
2  
3 1 important to investigate interventions that can be implemented in childhood to  
4  
5 2 improve muscle function and performance <sup>41</sup>. This is further supported with the  
6  
7 3 significantly lower MVIC in the LMC group in comparison to HMC. The reduced  
8  
9  
10 4 strength of the major locomotor muscle group in the LMC not only has implications  
11  
12 5 for function, with some reports of increased co-contraction <sup>42</sup>, but also for the impact  
13  
14 6 on health and quality of life. In a recent study by Buchan et al. <sup>43</sup>, high intensity  
15  
16 7 exercise has been shown to reduce cardiovascular risk and improve muscle function in  
17  
18 8 healthy children. As yet, this type of intensity has not been investigated in the  
19  
20 9 population of children included in this current study, however the evidence of their  
21  
22 10 willingness to push themselves maximally in this study warrants the application of  
23  
24 11 such intensities of exercise to measure the impact on health and movement measures.  
25  
26  
27  
28  
29

30 13 The findings from this work highlight the significant relationship between motor  
31  
32 14 competence level and health status. The reduced exercise capacity and muscular  
33  
34 15 performance demonstrated by the participants with poor motor competence highlight  
35  
36 16 the need for any exercise interventions to target the development of muscular  
37  
38 17 function. Research has shown that exercise interventions play a possible role in  
39  
40 18 improving motor competence levels in children with movement difficulties <sup>44</sup>  
41  
42 19 however, how these changes relate to alterations in markers of cardiovascular and  
43  
44 20 muscular health and the long term involvement in physical activity have yet to be  
45  
46 21 elucidated.  
47  
48  
49  
50  
51  
52  
53  
54  
55  
56  
57  
58  
59  
60

1  
2  
3 **Contributorship statement**  
4

5 Dr. Martyn Morris, Prof. Helen Dawes and Roel Janssen - Conception and design,  
6  
7 acquisition of data or analysis and interpretation of data, and drafting the article or  
8  
9 revising it critically for important intellectual content.  
10

11 Dr Ken Howells - Conception and design and drafting the article or revising it critically  
12  
13 for important intellectual content.  
14

15  
16 **Funding**  
17

18 None  
19

20  
21 **Data Sharing**  
22

23 No additional data available.  
24

25 **Competing Interests**  
26

27 None  
28  
29  
30  
31  
32

33 **References**  
34

- 35 1. Powell KE, Dysinger W. Childhood participation in organized school sports and physical  
36  
37 education as precursors of adult physical activity. *American Journal of Preventative*  
38  
39 *Medicine* 1987;3(5):276-81.  
40  
41 2. Rejeski WJ, Miller ME, King AC, et al. Predictors of adherence to physical activity in the  
42  
43 Lifestyle Interventions and Independence for Elders pilot study (LIFE-P). *Clin Interv*  
44  
45 *Aging* 2007;2(3):485-94.  
46  
47 3. Poulsen AA, Ziviani JM, Cuskelly M. Leisure time physical activity energy expenditure in  
48  
49 boys with developmental coordination disorder: The role of peer relations self-  
50  
51 concept perceptions. *Otjr-Occupation Participation and Health* 2008;28(1):30-39.  
52  
53 4. Haga M. Physical fitness in children with high motor competence is different from that in  
54  
55 children with low motor competence. *Phys Ther* 2009;89(10):1089-97.  
56  
57  
58  
59  
60



- 1 5. Calley A, Williams S, Reid S, et al. A comparison of activity, participation and quality of  
2 life in children with and without spastic diplegia cerebral palsy. *Disabil Rehabil*  
3 2012;34(15):1306-10.
- 4 6. Zimmet P, Alberti KG, Kaufman F, et al. The metabolic syndrome in children and  
5 adolescents - an IDF consensus report. *Pediatr Diabetes* 2007;8(5):299-306.
- 6 7. Wahi G, LeBlanc PJ, Hay JA, et al. Metabolic syndrome in children with and without  
7 developmental coordination disorder. *Research in Developmental Disabilities*  
8 2011;32(6):2785-89.
- 9 8. Maffei C, Zaffanello M, Pellegrino M, et al. Nutrient oxidation during moderately intense  
10 exercise in obese prepubertal boys. *J Clin Endocrinol Metab* 2005;90(1):231-6.
- 11 9. Cairney J, Hay JA, Wade TJ, et al. Developmental coordination disorder and aerobic  
12 fitness: Is it all in their heads or is measurement still the problem? *American Journal*  
13 *of Human Biology* 2006;18(1):66-70.
- 14 10. Hands B, Larkin D. Physical fitness differences in children with and without motor  
15 learning difficulties. *European Journal of Special Needs Education* 2006;21(4):447-  
16 56.
- 17 11. Peterson MD, Gordon PM, Hurvitz EA. Chronic disease risk among adults with cerebral  
18 palsy: the role of premature sarcopenia, obesity and sedentary behaviour. *Obes Rev*  
19 2013;14(2):171-82.
- 20 12. Powell KE, Dysinger W. Childhood participation in organized school sports and physical  
21 education as precursors of adult physical activity. *American journal of preventive*  
22 *medicine* 1987;3(5):276-81.
- 23 13. Kirby A, Edwards L, Sugden D, et al. The development and standardization of the Adult  
24 Developmental Co-ordination Disorders/Dyspraxia Checklist (ADC). *Research in*  
25 *Developmental Disabilities* 2010;31(1):131-39.
- 26 14. Heymsfield SB, Thomas D, Bosy-Westphal A, et al. Evolving concepts on adjusting  
27 human resting energy expenditure measurements for body size. *Obes*  
28 *Rev*;13(11):1001-14.

- 1  
2  
3 15. ODI. Disability statistics and research, 2013.  
4  
5 16. Barnett A, Dawes H, Morris M, et al. Barriers and facilitators to participation in physical  
6  
7 activity in teenagers with Developmental Coordination Disorder. *British*  
8  
9 *Psychological Society, Developmental Section Annual Conference*. University of  
10  
11 Nottingham & Nottingham Trent University, 2009.  
12  
13 17. Barnett A, Dawes, H, Wilmut, K. Constraints and facilitators to participation in physical  
14  
15 activity in teenagers with Developmental Co-ordination Disorder: an exploratory  
16  
17 interview study. *Child: Care, Health and Development* 2012.  
18  
19 18. Buffart LM, Westendorp T, van den Berg-Emons RJ, et al. Perceived barriers to and  
20  
21 facilitators of physical activity in young adults with childhood-onset physical  
22  
23 disabilities. *J Rehabil Med* 2009;41(11):881-5.  
24  
25 19. Rejeski W. Not what, but how one feels: the measurement of affect during exercise.  
26  
27 *Journal of Sport & Exercise Psychology* 1989;11:304-17.  
28  
29 20. Weiser PC, and Stamper, D.A. Psychophysiological interactions leading to increased  
30  
31 effort, leg fatigue, and respiratory distress during prolonged strenuous bicycle riding.  
32  
33 In: Borg G, editor. *Physical Work and Effort*. Oxford: Pergamon Press, 1977.  
34  
35 21. Schott N, Aloff V, Hultsch D, et al. Physical fitness in children with developmental  
36  
37 coordination disorder. *Research quarterly for exercise and sport* 2007;78(5):438-50.  
38  
39 22. Chia LC, Guelfi KJ, Licari MK. A comparison of the oxygen cost of locomotion in  
40  
41 children with and without developmental coordination disorder. *Developmental*  
42  
43 *medicine and child neurology* 2009;52(3):251-55.  
44  
45 23. Wu SK, Lin HH, Li YC, et al. Cardiopulmonary fitness and endurance in children with  
46  
47 developmental coordination disorder. *Research in developmental disabilities*  
48  
49 2009;31(2):345-9.  
50  
51 24. Henderson SE, Sugden DA, Barnett A. *Movement Assessment Battery for Children 2*  
52  
53 *Checklist*. London: Pearson, 2007.  
54  
55 25. Sugden D. *Developmental Coordination Disorder as a Specific Learning Difficulty*. Leeds  
56  
57 *Consensus Statement*. Cardiff: The Dyscovery Trust, 2006.  
58  
59  
60

- 1  
2  
3 1 26. Godfrey S, Davies CT, Wozniak E, et al. Cardio-respiratory response to exercise in  
4  
5 2 normal children. *Clinical science* 1971;40(5):419-31.  
6  
7 3 27. Ziemann U, Ishii K, Borgheresi A, et al. Dissociation of the pathways mediating  
8  
9 4 ipsilateral and contralateral motor-evoked potentials in human hand and arm muscles.  
10  
11 5 *J Physiol* 1999;518 ( Pt 3):895-906.  
12  
13 6 28. Parfitt G, Shepherd P, Eston R. Reliability of effort production using the children's  
14  
15 7 CALER and BABE perceived exertion scales. *Journal of Exercise Science and*  
16  
17 8 *Fitness* 2007;5:49-55.  
18  
19 9 29. Winter EM. *Sport and exercise physiology testing guidelines : the British Association of*  
20  
21 10 *Sport and Exercise Sciences guide*. London: Routledge, 2007.  
22  
23 11 30. Armstrong N, Welsman JR, Kirby BJ. Peak oxygen uptake and maturation in 12-yr olds.  
24  
25 12 *Medicine and science in sports and exercise* 1998;30(1):165-9.  
26  
27 13 31. Hansen JE, Casaburi R, Cooper DM, et al. Oxygen uptake as related to work rate  
28  
29 14 increment during cycle ergometer exercise. *European journal of applied physiology*  
30  
31 15 *and occupational physiology* 1988;57(2):140-5.  
32  
33 16 32. Wasserman K, Sietsema, K, Sue, D.Y, et al. *Principles Of Exercise Testing &*  
34  
35 17 *Interpretation: Including Pathophysiology And Clinical Applications*. 5th ed:  
36  
37 18 Lippinkott Williams and Wilkins., 2011.  
38  
39 19 33. Schott N, Alof V, Hultsch D, et al. Physical fitness in children with developmental  
40  
41 20 coordination disorder. *Research Quarterly for Exercise and Sport* 2007;78(5):438-50.  
42  
43 21 34. Ruiz JR, Ortega FB, Rizzo NS, et al. High cardiovascular fitness is associated with low  
44  
45 22 metabolic risk score in children: the European Youth Heart Study. *Pediatric research*  
46  
47 23 2007;61(3):350-5.  
48  
49 24 35. Anderssen SA, Cooper AR, Riddoch C, et al. Low cardiorespiratory fitness is a strong  
50  
51 25 predictor for clustering of cardiovascular disease risk factors in children independent  
52  
53 26 of country, age and sex. *Eur J Cardiovasc Prev Rehabil* 2007;14(4):526-31.  
54  
55 27 36. Karila C, De Blic J, Waernessyckle S. Cardiopulmonary Exercise Testing in Children. An  
56  
57 28 Individualized Protocol for Workload Increase. *Chest* 2001;120:81-87  
58  
59  
60

- 1  
2  
3 1 37. Buys R, Budts W, Reybrouck T, et al. Serial exercise testing in children, adolescents and  
4  
5 2 young adults with Senning repair for transposition of the great arteries. *BMC*  
6  
7 3 *Cardiovasc Disord* 2012;12:88.  
8  
9 4 38. ACSM. *ACSM's Guidelines For Exercise Testing And Prescription. Guidelines for graded*  
10  
11 5 *exercise testing and training*. 7ed. Philadelphia: Lea and Febiger: Lippincott Williams  
12  
13 6 and Wilkins, 2005.  
14  
15 7 39. Riddell MC, Jamnik VK, Iscoe KE, et al. Fat oxidation rate and the exercise intensity that  
16  
17 8 elicits maximal fat oxidation decreases with pubertal status in young male subjects. *J*  
18  
19 9 *Appl Physiol* 2008;105(2):742-8.  
20  
21 10 40. Wolfe RR. The underappreciated role of muscle in health and disease. *Am J Clin Nutr*  
22  
23 11 2006;84(3):475-82.  
24  
25 12 41. Verschuren O, Ketelaar M, Takken T, Helder PJ, et al. Exercise programs for children  
26  
27 13 with cerebral palsy: a systematic review of the literature. *Am J Phys Med Rehabil*  
28  
29 14 2008;87(5):404-17.  
30  
31 15 42. Raynor AJ. Strength, power, and coactivation in children with developmental  
32  
33 16 coordination disorder. *Dev Med Child Neurol* 2001;43(10):676-84.  
34  
35 17 43. Buchan DS, Ollis S, Thomas NE, et al. Physical activity interventions: effects of duration  
36  
37 18 and intensity. *Scandinavian Journal of Medicine & Science in Sports*  
38  
39 19 2011;21(6):E341-E50.  
40  
41 20 44. Hung WWY, Pang M. Y. C. Effects of group-based versus individual-based exercise  
42  
43 21 training on motor performance in children with developmental coordination  
44  
45 22 disorder: a randomized controlled pilot study. *Journal of Rehabilitation Medicine*  
46  
47 23 2010;42:122-28.  
48  
49 24  
50  
51 25  
52  
53 26  
54  
55 27  
56  
57 28  
58  
59  
60

1  
2  
3  
4  
5  
6  
7  
8  
9  
10  
11  
12  
13  
14  
15  
16  
17  
18  
19  
20  
21  
22  
23  
24  
25  
26  
27  
28  
29  
30  
31  
32  
33  
34  
35  
36  
37  
38  
39  
40  
41  
42  
43  
44  
45  
46  
47  
48  
49  
50  
51  
52  
53  
54  
55  
56  
57  
58  
59  
60

1  
2  
3  
4

For peer review only

1  
2  
3  
4  
5  
6  
7  
8  
9  
10  
11  
12  
13  
14  
15  
16  
17  
18  
19  
20  
21  
22  
23  
24  
25  
26  
27  
28  
29  
30  
31  
32  
33  
34  
35  
36  
37  
38  
39  
40  
41  
42  
43  
44  
45  
46  
47  
48  
49  
50  
51  
52  
53  
54  
55  
56  
57  
58  
59  
60

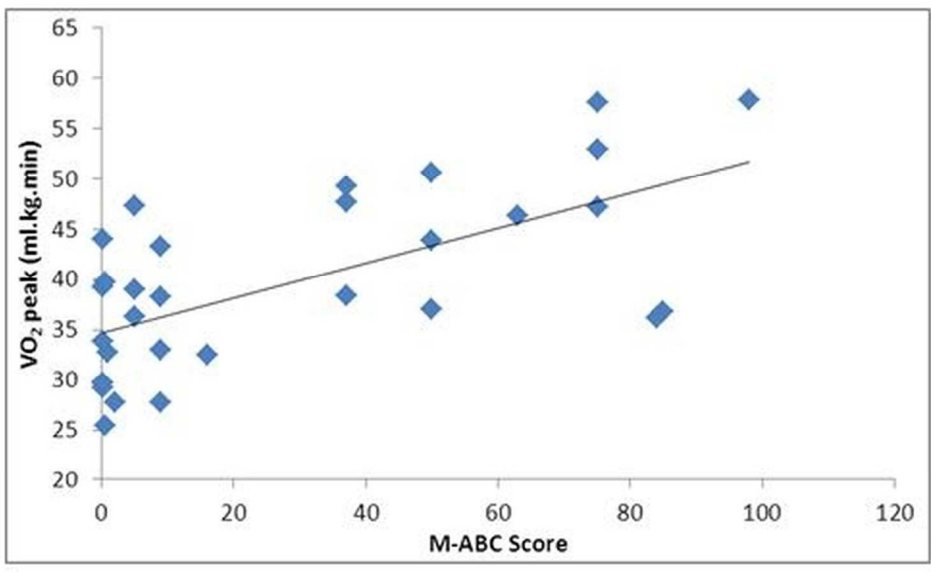

Figure 1. Relationship between M-ABC score and  $\dot{V}O_2$  peak.

Figure 1. Relationship between M-ABC score and peak.  
137x96mm (300 x 300 DPI)

view only

1  
2  
3  
4  
5  
6  
7  
8  
9  
10  
11  
12  
13  
14  
15  
16  
17  
18  
19  
20  
21  
22  
23  
24  
25  
26  
27  
28  
29  
30  
31  
32  
33  
34  
35  
36  
37  
38  
39  
40  
41  
42  
43  
44  
45  
46  
47  
48  
49  
50  
51  
52  
53  
54  
55  
56  
57  
58  
59  
60

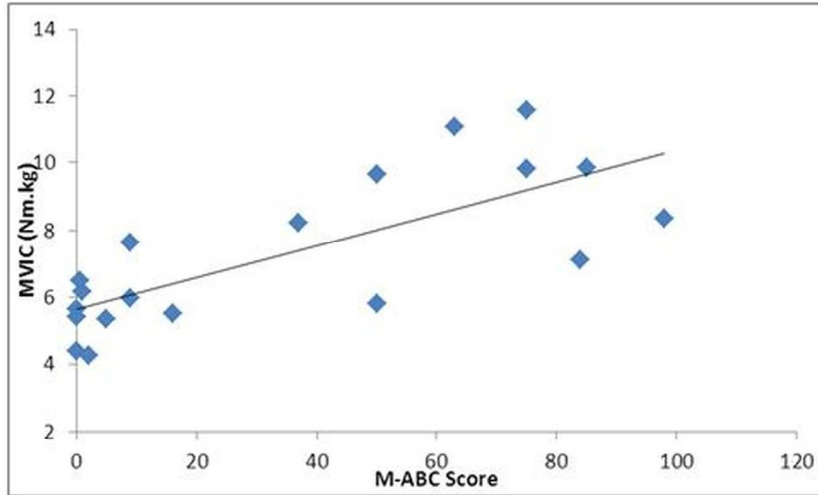

Figure 2. Relationship between M-ABC score and MVIC.

Figure 2. Relationship between M-ABC score and MVIC.  
155x106mm (300 x 300 DPI)

view only



## Motor Impairment and its relationship to fitness in children

|                                 |                                                                                                                                                                                                                                 |
|---------------------------------|---------------------------------------------------------------------------------------------------------------------------------------------------------------------------------------------------------------------------------|
| Journal:                        | <i>BMJ Open</i>                                                                                                                                                                                                                 |
| Manuscript ID:                  | bmjopen-2013-002909.R1                                                                                                                                                                                                          |
| Article Type:                   | Research                                                                                                                                                                                                                        |
| Date Submitted by the Author:   | 09-May-2013                                                                                                                                                                                                                     |
| Complete List of Authors:       | Morris, Martyn; Oxford Brookes University, Sport and Health Sciences<br>Dawes, Helen; Oxford Brookes University, Sport and Health Science<br>Howells, Ken; Oxford Brookes University, Sport and Health Science<br>Janssen, Roel |
| <b>Primary Subject Heading</b>: | Paediatrics                                                                                                                                                                                                                     |
| Secondary Subject Heading:      | Paediatrics, Sports and exercise medicine                                                                                                                                                                                       |
| Keywords:                       | PAEDIATRICS, Muscle, Health, Motor competence                                                                                                                                                                                   |
|                                 |                                                                                                                                                                                                                                 |

SCHOLARONE™  
Manuscripts

Peer Review Only



1  
2  
3 1 **Motor Impairment and its relationship to fitness in children**  
4  
5 2  
6  
7 3 Martyn Morris  
8  
9 4 Helen Dawes  
10  
11 5 Ken Howells  
12  
13 6 Roel Janssen  
14  
15  
16 7 **Corresponding author**  
17  
18 8 Dr. Martyn Morris  
19  
20 9 Department of Sport and Health Sciences  
21  
22 10 Oxford Brookes University  
23  
24 11 Headington Campus  
25  
26 12 Gipsy Lane  
27  
28 13 Oxford OX3 0BP  
29  
30 14 U.K.  
31  
32 15 mgmorris@brookes.ac.uk  
33  
34  
35  
36  
37  
38 17 **Key words:** Motor impairment,  $\dot{V}O_2$  max, fitness, muscle  
39  
40 18 **Word count: 2621**  
41  
42  
43  
44  
45  
46  
47  
48  
49  
50  
51  
52  
53  
54  
55  
56  
57  
58  
59  
60

1  
2  
3 **Abstract**

4 **Background:** Children with movement impairments are known to perform poorly in  
5  
6  
7  
8  
9  
10  
11  
12  
13  
14  
15  
16  
17  
18  
19  
20  
21  
22  
23  
24  
25  
26  
27  
28  
29  
30  
31  
32  
33  
34  
35  
36  
37  
38  
39  
40  
41  
42  
43  
44  
45  
46  
47  
48  
49  
50  
51  
52  
53  
54  
55  
56  
57  
58  
59  
60  
exercise tests but the nature of the limiting factor is often unknown.

4 **Aim:** The aim of this work was to explore physiological and perceptual limits to  
5  
6  
7  
8  
9  
10  
11  
12  
13  
14  
15  
16  
17  
18  
19  
20  
21  
22  
23  
24  
25  
26  
27  
28  
29  
30  
31  
32  
33  
34  
35  
36  
37  
38  
39  
40  
41  
42  
43  
44  
45  
46  
47  
48  
49  
50  
51  
52  
53  
54  
55  
56  
57  
58  
59  
60  
exercise in children with varying degrees of motor impairment, and the relationships  
to measures of health.

7 **Methods:** 35 boys aged 12-15yrs completed the Movement ABC test for the  
8  
9  
10  
11  
12  
13  
14  
15  
16  
17  
18  
19  
20  
21  
22  
23  
24  
25  
26  
27  
28  
29  
30  
31  
32  
33  
34  
35  
36  
37  
38  
39  
40  
41  
42  
43  
44  
45  
46  
47  
48  
49  
50  
51  
52  
53  
54  
55  
56  
57  
58  
59  
60  
assessment of motor impairment, followed by an incremental cycle ergometer test to  
exhaustion for the assessment of maximal oxygen uptake ( $\dot{V}O_{2peak}$ ), respiratory  
exchange ratio (RER), heart rate (HR) and rating of perceived exertion (RPE).  
10 participants classified as having either high or low motor impairment also  
performed a maximal voluntary isometric contraction (MVIC) for the assessment of  
lower limb extensor strength.

14 **Results:** 18 boys were classified as having high motor impairment. All but one  
15  
16  
17  
18  
19  
20  
21  
22  
23  
24  
25  
26  
27  
28  
29  
30  
31  
32  
33  
34  
35  
36  
37  
38  
39  
40  
41  
42  
43  
44  
45  
46  
47  
48  
49  
50  
51  
52  
53  
54  
55  
56  
57  
58  
59  
60  
participant met the criteria for maximum effort, both perceptually and physiologically,  
in the exercise test. There was a significant difference in  $\dot{V}O_2$  peak (34.9 v 48.5  
ml.kg.min<sup>-1</sup>),  $\dot{V}O_2$  workload (12.5 v 10.0ml.W), maximal heart rate (176 v 188  
beats.min<sup>-1</sup>), maximal oxygen pulse (12.1 v 15.9 ml.beat) and MVIC (5.7 v 9.1  
Nm.kg) between the high and low motor impaired participants respectively. There  
was no significant difference in the RER or RPE between the groups.

21 **Conclusion:** When performing cycling ergometry, perceived exertion was not a  
22  
23  
24  
25  
26  
27  
28  
29  
30  
31  
32  
33  
34  
35  
36  
37  
38  
39  
40  
41  
42  
43  
44  
45  
46  
47  
48  
49  
50  
51  
52  
53  
54  
55  
56  
57  
58  
59  
60  
limiting factor in children with high motor impairment. The lower heart rate at  
exercise cessation, coupled with reduced movement efficiency and lower muscle  
strength reported in this group, would suggest exercise is limited by impairment at the  
muscular level. This finding was supported by the high RER values despite low

1  
2  
3 1 maximal heart rate values attained during the exercise test and reduced maximal  
4  
5 2 strength. Perception of effort is not heightened in children with high motor  
6  
7 3 impairment and future exercise interventions should be focused on improving  
8  
9  
10 4 muscular condition in participants with high motor impairment to enable them to be  
11  
12 5 better prepared to engage in physical activity for health.  
13  
14  
15  
16  
17  
18  
19  
20  
21  
22  
23  
24  
25  
26  
27  
28  
29  
30  
31  
32  
33  
34  
35  
36  
37  
38  
39  
40  
41  
42  
43  
44  
45  
46  
47  
48  
49  
50  
51  
52  
53  
54  
55  
56  
57  
58  
59  
60

For peer review only

## 1 Introduction

2 Physical activity levels in childhood have been shown to predict adult activity  
3 behavior<sup>1,2</sup>, affecting life expectancy and quality of life years. As such, successfully  
4 achieving an active lifestyle in childhood is critical. Children with movement  
5 difficulties and poor coordination tend to have lower levels of physical activity  
6 participation than their typically developing peers<sup>3-5</sup>. Further, this group of children,  
7 with reduced motor coordination and low activity levels, have been found to have  
8 significantly higher metabolic syndrome indicators<sup>6</sup>, including: abdominal adiposity,  
9 blood pressure and triglyceride levels compared to their typically developing peers<sup>7</sup>  
10<sup>8</sup>. Of added concern is that such motor impairments are known to persist into  
11 adulthood, further impacting on the ability of these individuals to achieve a physically  
12 active lifestyle as adults<sup>9-11</sup>. The number of people with some form of motor  
13 impairment in the UK population is 2.6 million<sup>12</sup> and as such this group is an  
14 important proportion of society who should be considered within public health policy.  
15 Understanding factors particularly affecting the exercise experience in these  
16 individuals is essential if higher physical activity levels are to be achieved.  
17 In a series of interviews with adolescents with Developmental Coordination Disorder  
18 (DCD)<sup>13,14</sup> and with children with cerebral palsy<sup>15</sup>, exercise-induced symptoms of  
19 muscle fatigue, poor physical tolerance and low energy levels have also been  
20 reported as major factors reducing enjoyment, tolerance and participation. However,  
21 as yet, the underpinning physiological limits have not been fully explored. We know  
22 that individual's judge and limit effort during exercise from symptoms arising from  
23 muscles, joints and the cardiovascular system; choosing to reduce how hard they are  
24 exercising when symptoms become too strong<sup>16,17</sup>. Children with increased motor  
25 impairment are known to perform poorly in sport and exercise fitness screening tests

1  
2  
3 1<sup>18 19</sup>, but the physiological and perceptual responses limiting exercise performance  
4  
5 2 have not been explored in these individuals<sup>18 20 21</sup>.  
6

### 7 **Aims**

8  
9  
10 4 The study set out to explore, in individuals with different levels of motor impairment,  
11  
12 5 physiological and perceptual measures during and limiting maximal exercise  
13  
14 6 performance.  
15

### 16 **Methods**

#### 17 *Procedure*

18  
19  
20 9 The study was approved by the University Research Ethics Committee (UREC).  
21  
22  
23 10 Participants were recruited through two routes, either through a database of those who  
24  
25 11 had taken part in our previous research or through advertisements and posters.  
26  
27 12 Families indicating that they were interested in taking part were sent separate child  
28  
29 13 and parent information sheets and gave their written consent prior to the study.  
30  
31  
32 14 Participants attended the Human Performance Laboratory for testing, with parents  
33  
34 15 attending only to help complete a health screening questionnaire for their child. The  
35  
36 16 testing session consisted of the participant completing the Movement ABC-2 Test  
37  
38 17 (MABC-2)<sup>22</sup> for a measure of motor impairment, followed by the exercise testing.  
39  
40  
41 18 Details of these measures can be found below.

42  
43 19 Participants were asked to refrain from eating, performing exercise or drinking  
44  
45 20 caffeine in the 2-hour period before attending the sessions.  
46

47  
48 21

#### 49 *Participants*

50  
51  
52 23 Thirty five males aged 12 to 15 years with no known neurological condition were  
53  
54 24 recruited. Individuals were classified on the level of motor ability using the  
55  
56 25 Movement ABC-2 test.  
57  
58  
59  
60

1  
2  
3 1 *Measures*

4  
5 2 Movement ABC-2 Test (MABC-2)<sup>22</sup>.

6  
7 3 This standardised test of motor skill was used to confirm the presence of significant  
8  
9 4 movement difficulties. Eight age appropriate items were individually administered as  
10  
11 5 described in the test manual. Raw scores for each task were converted to standard  
12  
13 6 scores, summed across three sub-sections to obtain a standard score for Manual  
14  
15 7 Dexterity, Aiming & Catching and Balance. A total test score and percentile rank was  
16  
17 8 also obtained. For the diagnosis of motor impairment, it has been recommended that  
18  
19 9 scores below the 5<sup>th</sup> percentile indicate definite motor impairment while scores  
20  
21 10 between the 5<sup>th</sup> and 15<sup>th</sup> percentile indicate borderline scores<sup>23</sup>. Therefore, any child  
22  
23 11 scoring below the 15<sup>th</sup> percentile in this current study was classed as having high  
24  
25 12 motor impairment (HMI).

26  
27  
28  
29 13 *Exercise testing*

30  
31  
32 14 Height (Holtain stadiometer), weight (Seca scales) and body mass index (BMI) were  
33  
34 15 recorded prior to the exercise test. After resting for 6 minutes participants underwent  
35  
36 16 an incremental cycle ergometer exercise test (Lode Excalibur Sport, Gronigen,  
37  
38 17 Netherlands) of 1 minute stages after an initial 2 minutes of unloaded cycling.  
39  
40 18 Workload was progressed based on the Godfrey protocol<sup>24</sup> (increasing workload by  
41  
42 19 15-20 Watts from unloaded cycling based on the height of the participant). The test  
43  
44 20 ended at volitional exhaustion or if the participant was unable to maintain a cadence  
45  
46 21 of 60 rpm, with verbal encouragement given throughout.

47  
48  
49 22 Pulmonary gas exchange was measured breath-by-breath using an automated  
50  
51 23 metabolic analysis system (Cortex Metalyzer, Leipzig Germany). The system was  
52  
53 24 calibrated prior to each test in accordance with manufacturer's instructions. All  
54  
55 25 participants wore a face mask covering the nose and mouth connected to a low-

1  
2  
3 1 resistance volume transducer (Triple V, Hoechberg, Germany). Heart rate was  
4  
5 2 recorded continuously throughout the testing protocol using short-range telemetry  
6  
7 3 (Polar S810, Finland). Oxygen uptake ( $\dot{V}O_2$ ) was calculated as the average  $\dot{V}O_2$  in the  
8  
9  
10 4 last 30s of each stage, whilst  $\dot{V}O_2$  peak was recorded as the highest 60s average before  
11  
12 5 the termination of the test. The respiratory exchange ratio (RER) was calculated from  
13  
14 6 the ratio of  $\dot{V}CO_2$  to  $\dot{V}O_2$  at each workload level throughout the exercise test.

15  
16  
17 7 Maximal fat oxidation was calculated using the equations of Frayn<sup>25</sup> in equation 1  
18  
19 8 below:

$$\text{Eq. 1 Fat oxidation (g.min)} = 1.67 \times \dot{V}O_2 - 1.67 \times \dot{V}CO_2$$

20  
21  
22 9  
23  
24 10 The relationship between the amount of oxygen utilised for a given work rate was  
25  
26 11 calculated from the linear slope of the relationship between  $\dot{V}O_2$  and Watts ( $\dot{V}O_2/W$ )  
27  
28 12 and was used as a measure of muscular efficiency. Oxygen pulse, a non-invasive  
29  
30 13 indicator of cardiac function, was calculated by dividing the  $\dot{V}O_2$  by heart rate  
31  
32  
33 14 ( $\dot{V}O_2/HR$ ). Maximum workload ( $Workload_{max}$ ) was calculated as the final completed  
34  
35  
36 15 workload. Rating of perceived exertion (RPE) was measured at the end of each stage  
37  
38 16 using the Cart and Load scale (CALER), which has previously been used to assess  
39  
40 17 children's perception of effort during exercise<sup>26</sup>. The CALER has a scale from 1 to  
41  
42 18 10 with 1 being classed as 'very easy' and 10 being 'so hard I'm going to stop'.  
43  
44 19 Illustrations of a child pulling a cart behind their bicycle, which was progressively  
45  
46 20 laden with bricks, accompanied the scale.  
47  
48  
49 21 The criteria for true maximal effort included a plateau in  $\dot{V}O_2$  max, maximal heart rate  
50  
51 22  $\geq 95\%$  of age predicted maximum and RER  $>1.06$ <sup>27</sup>. All children were fully  
52  
53  
54 23 familiarised with the testing protocol prior to commencing the session.  
55  
56 24  
57  
58  
59  
60

## 1 MVIC Protocol

2 Participants performed a 1RM leg extensor strength test on a specially designed  
3 isometric strength-testing chair. The knee angle was 90<sup>0</sup> and the rotation axis of the  
4 strength chair was aligned with the knee axis. Participants were asked to relax for 30  
5 seconds, thereafter subjects performed maximum knee extension for approximately 5  
6 seconds. Verbal encouragement was given to reach the maximum force. After this  
7 maximum knee extension subjects relaxed for 30 seconds. This test was repeated three  
8 times, 1RM was the maximum output reached.

9 Electrical signals from the torque transducer were amplified (Digitimer Neurolog  
10 NL107 Recorder Amplifier) and digitised (Cambridge Electronic Design, micro1401).  
11 Torque from maximal voluntary contractions (MVIC) was recorded on a PC for  
12 subsequent analysis using Spike data analysis software (Spike 2 Version 5.0 for  
13 Windows).

## 14 **Data Analysis**

15 Descriptive statistics (mean +/- SD, range) were calculated for all variables.  
16 All exercise testing measure distributions were examined for normality. Linear  
17 regression analysis was performed to examine relationships between M-ABC score  
18 and the exercise variables. Ten participants reporting high motor impairment returned  
19 to the laboratory to repeat the exercise test to establish reliability data in this  
20 population. Test re-test reliability was analysed to test for systematic and random  
21 error using student t-test, intraclass correlation coefficient (ICC) [3,1], bias (average  
22 difference) and random error (1.96 x SD of differences). Statistical significance was  
23 accepted at p<0.05.

24  
25  
26  
27



## 1 Results

### 4 *Movement ABC-2 Test*

5 Eighteen participants obtained total scores considered to be HMI, i.e. below the M-  
6 ABC 15<sup>th</sup> percentile, with 5 at or below the 5<sup>th</sup> percentile, and 17 classified as low  
7 motor impairment (LMI) (M-ABC > 15<sup>th</sup> percentile). Table 1 displays the participant  
8 characteristics from the test battery.

9 >>>>insert table 1 here

10

11 As expected, there was a significant difference in the Movement ABC percentile score  
12 between the HMI and LMI group (4.0 (4.7) v 62.8 (20.7), p<0.05).

13

### 14 *Exercise Testing*

15 There was a significant difference in  $\dot{V}O_2$  peak (34.9 (6.3) v 48.5 (7.9) ml.kg.min<sup>-1</sup>),  
16  $\dot{V}O_2$ /workload (12.5 (3.9) v 10.0 (1.3)  $\dot{V}O_2$ /W), oxygen pulse (12.1 (3.7) v 15.9 (4.0)  
17 ml.beat), maximum heart rate (176 (19.7) v 188 (8.8) beats.min) and MVIC (5.7 (1.0)  
18 v 9.0 (1.8) Nm.kg) with the LMI group achieving higher  $\dot{V}O_2$ , oxygen pulse,  
19 maximum heart rate and MVIC.

20 There was no difference between the groups in the respiratory exchange ratio (RER),  
21 with all but one participant demonstrating a maximal value greater than 1.0 at the end  
22 of the test. There was also no significant difference in maximal fat oxidation levels  
23 between the groups.

24 Compared to established maximal criteria for typically developing children<sup>28</sup> all but  
25 one of the participants met the criteria for a maximal effort during the exercise test,  
26 with no significant difference between the HMI and LMI groups. There was no  
27 difference in the perception of effort throughout the exercise trial and at exercise

1  
2  
3 1 termination, with all participants reporting an RPE rating of 9 or 10 at the end of the  
4  
5 2 test, despite individuals in the HMI group having significantly lower maximum HR  
6  
7 3 values at the end of the cycle ergometer test.  
8  
9  
10 4

11  
12 5 There were significant relationships between the MABC score and  $\dot{V}O_2$  peak ( $r = 0.36$ ,  
13  
14 6  $p < 0.05$ ) (figure 1) and MVIC ( $r = 0.76$ ,  $p < 0.01$ ) (figure 2).  
15  
16  
17 7

18  
19 8  
20  
21 9 Figure 1. Relationship between M-ABC score and  $\dot{V}O_2$  peak.  
22

23 10 Table 2 below displays the characteristics of the participants who undertook the  
24  
25 11 MVIC testing  
26

27 12  
28  
29  
30 13 >>>>>>insert table 2 here  
31

32 14  
33  
34 15 Figure 2. Relationship between M-ABC score and MVIC.  
35  
36 16

### 37 17 *Test re-test reliability of exercise measures*

38  
39 18 10 HMI participants returned to the laboratory to complete a second maximal exercise  
40  
41 19 test for the assessment of reliability in this population. The maximal exercise data  
42  
43 20 demonstrated good reliability with ICC scores for  $\dot{V}O_2$  peak 0.75 (CI 0.23-0.94; t 0.39,  
44  
45 21 bias 3.54, random error 6.93), maximal heart rate 0.93 (CI 0.73-0.98; t -0.86, bias 7.8,  
46  
47 22 random error 15.4) and maximal RER 0.89 (CI 0.59-0.98; t -0.14, bias 0.07, random  
48  
49 23 error 0.14). Maximal RPE ICC scores were all rated 9-10 thus affecting the ICC 0.05  
50  
51 24 (CI -0.60-0.66), but had a low bias (t -2.14, bias 0.86, random error 1.68).  
52  
53  
54  
55  
56  
57

## 58 26 **Discussion**

59  
60

1  
2  
3 1 The study set out to explore, in individuals with different levels of motor impairment,  
4  
5 2 physiological and perceptual factors during and limiting maximal exercise  
6  
7 3 performance. Examination of the exercise test data showed a significant difference in  
8  
9 4  $\dot{V}O_2$  peak,  $\dot{V}O_2$ / workload, oxygen pulse, maximum heart rate and MVIC between the  
10  
11 5 HMI and LMI group. Interestingly there was no difference maximal rating of  
12  
13 6 perceived exertion or RER. When considering limits to exercise in people with high  
14  
15 7 motor impairment, the maximal RER and fat oxidation levels at test termination,  
16  
17 8 suggest low levels of aerobic muscle performance and not a heightened perceived  
18  
19 9 level of exertion, were limiting exercise performance. These findings are important as  
20  
21 10 they highlight a low level of aerobic muscle performance as a major factor limiting  
22  
23 11 exercise performance in children with poor coordination. Muscle plays a central role  
24  
25 12 in health and disease across the lifespan<sup>29</sup> and, if left unaddressed in children with  
26  
27 13 HMI, is likely to continue into adulthood and contribute to the development of  
28  
29 14 metabolic disorders in this population.  
30  
31  
32  
33  
34  
35  
36

37 16 Despite children with HMI demonstrating a linear  $\dot{V}O_2$ / workload response, the value  
38  
39 17 of 12.5 (3.9) ml.W reflects a reduced movement economy throughout the exercise<sup>30</sup>.  
40  
41 18  $\dot{V}O_2$  normally rises at a rate of about 8.5-11 ml.min.watt and is independent of sex,  
42  
43 19 age, body weight or height<sup>31</sup>. Thus, in children with HMI, exercise participation may  
44  
45 20 be limited by the impaired ability of the muscle to work aerobically. The reduced  
46  
47 21 muscular strength of the quadriceps reported in this study further supports the main  
48  
49 22 limiting factor being at the muscular level and this finding supports the findings from  
50  
51 23 previous studies citing a reduced strength in other muscle groups in children with  
52  
53 24 greater motor impairment<sup>32</sup>.  
54  
55  
56  
57  
58  
59  
60

1  
2  
3 1 In comparison to the LMI group, the HMI group had a reduced exercise capacity, with  
4  
5 2 a mean  $\dot{V}O_2$  peak of 34.9 ml.kg.min<sup>-1</sup>. The  $\dot{V}O_2$  peak was below the cardiovascular  
6  
7 3 fitness threshold in the HMI children<sup>33</sup> and as such associated with an increased risk  
8  
9 4 of obesity, Type II diabetes and cardiovascular and metabolic disorders in adulthood  
10  
11 5<sup>34</sup>. Considered alongside the low maximum heart rates demonstrated by these  
12  
13 6 children (mean 176 beats.min<sup>-1</sup>) in comparison to LMI participants (188 beats.min<sup>-1</sup>)  
14  
15 7 and those reported in normal healthy children at the end of a similar cycling protocol  
16  
17 8<sup>35</sup>, our findings suggest that a low level of aerobic muscle performance was limiting  
18  
19 9 the ability of children with HMI to push themselves hard enough to maximally tax the  
20  
21 10 cardiovascular system. Despite a significantly lower oxygen pulse level between the  
22  
23 11 groups (12.1 (3.7) v 15.9 (4.0)ml.beat, p<0.05), the HMI group was not different to  
24  
25 12 those in healthy individuals reported previously<sup>36</sup>. This further supports the findings  
26  
27 13 that the limiting factor is of peripheral, and not central, origin. Given the emerging  
28  
29 14 role of mitochondrial dysfunction in many neuromuscular disorders, a lack of aerobic  
30  
31 15 capability in the muscles of children with poor motor control may impact on their  
32  
33 16 long-term health and may prevent them from increasing their heart rate to the level  
34  
35 17 required to achieve an aerobic training stimulus and attain fitness, health and  
36  
37 18 wellbeing benefits according to current guidelines for physical activity in children<sup>37</sup>.  
38  
39 19 Interestingly, despite the reduced aerobic fitness there was no difference in the  
40  
41 20 utilisation of fat as a substrate during the exercise protocol between the groups in this  
42  
43 21 study. The levels of fat oxidation in this current study were within the range  
44  
45 22 previously reported in healthy participants of similar age<sup>38</sup>. The number of  
46  
47 23 individuals in this sample is relatively small, however we included a range of  
48  
49 24 individuals with different motor capabilities and in the sub group of HMI participants  
50  
51  
52  
53  
54  
55  
56  
57  
58  
59  
60

1  
2  
3 1 that returned to the laboratory we established good reliability in the clinical exercise  
4  
5 2 testing in this population.  
6

7 3 Muscle function has been found to have an important role in long term health <sup>29</sup> and  
8  
9 4 considering our observation of reduced muscle capacity in individuals with HMI, it is  
10  
11 5 important to investigate interventions that can be implemented in childhood to  
12  
13 6 improve muscle function and performance <sup>39</sup>. This is further supported with the  
14  
15 7 significantly lower MVIC in the HMI group in comparison to LMI. The reduced  
16  
17 8 strength of the major locomotor muscle group in the HMI not only has implications  
18  
19 9 for function, with some reports of increased co-contraction <sup>40</sup>, but also for the impact  
20  
21 10 on health and quality of life. In a recent study by Buchan et al. <sup>41</sup>, high intensity  
22  
23 11 exercise has been shown to reduce cardiovascular risk and improve muscle function in  
24  
25 12 healthy children. As yet, this type of intensity has not been investigated in the  
26  
27 13 population of children included in this current study, however the evidence of their  
28  
29 14 willingness to push themselves maximally in this study warrants the application of  
30  
31 15 such intensities of exercise to measure the impact on health and movement measures.  
32  
33 16 Work by Cairney et.al. <sup>18</sup> suggested that reduced exercise performance of children with  
34  
35 17 motor impairment was partly related to the level of perceived adequacy for the task.  
36  
37 18 The findings of this current work suggest that the limitations to exercise in the high  
38  
39 19 motor impairment group had strong physiological underpinnings reflected in the  
40  
41 20 criteria for a maximal effort being attained in all but one of the participants.  
42  
43  
44  
45  
46  
47

48  
49 21  
50 22 The findings from this work highlight the significant relationship between motor  
51  
52 23 impairment level and health status. The reduced exercise capacity and muscular  
53  
54 24 performance demonstrated by the participants with greater motor impairment  
55  
56 25 highlight the need for any exercise interventions to target the development of  
57  
58  
59  
60

1 muscular function. Research has shown that exercise interventions play a possible  
2 role in improving motor competence levels in children with movement difficulties <sup>42</sup>  
3 however, how these changes relate to alterations in markers of cardiovascular and  
4 muscular health and the long term involvement in physical activity have yet to be  
5 elucidated.

### Contributorship statement

Dr. Martyn Morris, Prof. Helen Dawes and Roel Janssen - Conception and design,  
acquisition of data or analysis and interpretation of data, and drafting the article or  
revising it critically for important intellectual content.

Dr Ken Howells - Conception and design and drafting the article or revising it critically  
for important intellectual content.

### References

1. Powell KE, Dysinger W. Childhood participation in organized school sports and physical education as precursors of adult physical activity. *American Journal of Preventative Medicine* 1987;3(5):276-81.
2. Rejeski WJ, Miller ME, King AC, Studenski SA, Katula JA, Fielding RA, et al. Predictors of adherence to physical activity in the Lifestyle Interventions and Independence for Elders pilot study (LIFE-P). *Clin Interv Aging* 2007;2(3):485-94.
3. Poulsen AA, Ziviani JM, Cuskelly M. Leisure time physical activity energy expenditure in boys with developmental coordination disorder: The role of peer relations self-concept perceptions. *Otjr-Occupation Participation and Health* 2008;28(1):30-39.

- 1
- 2
- 3 1 4. Haga M. Physical fitness in children with high motor competence is different from that in
- 4 2 children with low motor competence. *Phys Ther* 2009;89(10):1089-97.
- 5 3 5. Calley A, Williams S, Reid S, Blair E, Valentine J, Girdler S, et al. A comparison of
- 6 4 activity, participation and quality of life in children with and without spastic diplegia
- 7 5 cerebral palsy. *Disabil Rehabil* 2012;34(15):1306-10.
- 8 6 6. Zimmet P, Alberti KG, Kaufman F, Tajima N, Silink M, Arslanian S, et al. The metabolic
- 9 7 syndrome in children and adolescents - an IDF consensus report. *Pediatr Diabetes*
- 10 8 2007;8(5):299-306.
- 11 9 7. Wahi G, LeBlanc PJ, Hay JA, Faught BE, O'Leary D, Cairney J. Metabolic syndrome in
- 12 10 children with and without developmental coordination disorder. *Research in*
- 13 11 *Developmental Disabilities* 2011;32(6):2785-89.
- 14 12 8. Maffei C, Zaffanello M, Pellegrino M, Banzato C, Bogoni G, Viviani E, et al. Nutrient
- 15 13 oxidation during moderately intense exercise in obese prepubertal boys. *J Clin*
- 16 14 *Endocrinol Metab* 2005;90(1):231-6.
- 17 15 9. Powell KE, Dysinger W. Childhood participation in organized school sports and physical
- 18 16 education as precursors of adult physical activity. *American journal of preventive*
- 19 17 *medicine* 1987;3(5):276-81.
- 20 18 10. Kirby A, Edwards L, Sugden D, Rosenblum S. The development and standardization of
- 21 19 the Adult Developmental Co-ordination Disorders/Dyspraxia Checklist (ADC).
- 22 20 *Research in Developmental Disabilities* 2010;31(1):131-39.
- 23 21 11. Heymsfield SB, Thomas D, Bosy-Westphal A, Shen W, Peterson CM, Muller MJ.
- 24 22 Evolving concepts on adjusting human resting energy expenditure measurements for
- 25 23 body size. *Obes Rev*;13(11):1001-14.
- 26 24 12. ODI. Disability statistics and research, 2013.
- 27 25 13. Barnett A, Dawes H, Morris M, Wilmot K, Howells K. Barriers and facilitators to
- 28 26 participation in physical activity in teenagers with Developmental Coordination
- 29 27 Disorder. *British Psychological Society, Developmental Section Annual Conference.*
- 30 28 University of Nottingham & Nottingham Trent University, 2009.
- 31 29 14. Barnett A, Dawes, H, Wilmot, K. Constraints and facilitators to participation in physical
- 32 30 activity in teenagers with Developmental Co-ordination Disorder: an exploratory
- 33 31 interview study. *Child: Care, Health and Development* 2012.
- 34 32 15. Buffart LM, Westendorp T, van den Berg-Emons RJ, Stam HJ, Roebroek ME. Perceived
- 35 33 barriers to and facilitators of physical activity in young adults with childhood-onset
- 36 34 physical disabilities. *J Rehabil Med* 2009;41(11):881-5.
- 37 35 16. Rejeski W. Not what, but how one feels: the measurement of affect during exercise.
- 38 36 *Journal of Sport & Exercise Psychology* 1989;11:304-17.
- 39 37 17. Weiser PC, and Stamper, D.A. Psychophysiological interactions leading to increased
- 40 38 effort, leg fatigue, and respiratory distress during prolonged strenuous bicycle riding.
- 41 39 In: Borg G, editor. *Physical Work and Effort*. Oxford: Pergamon Press, 1977.
- 42 40 18. Cairney J, Hay JA, Wade TJ, Faught BE, Flouris A. Developmental coordination disorder
- 43 41 and aerobic fitness: Is it all in their heads or is measurement still the problem?
- 44 42 *American Journal of Human Biology* 2006;18(1):66-70.
- 45 43 19. Schott N, Alof V, Hultsch D, Meermann D. Physical fitness in children with
- 46 44 developmental coordination disorder. *Research quarterly for exercise and sport*
- 47 45 2007;78(5):438-50.
- 48 46 20. Chia LC, Guelfi KJ, Licari MK. A comparison of the oxygen cost of locomotion in
- 49 47 children with and without developmental coordination disorder. *Developmental*
- 50 48 *medicine and child neurology* 2009;52(3):251-55.
- 51 49 21. Wu SK, Lin HH, Li YC, Tsai CL, Cairney J. Cardiopulmonary fitness and endurance in
- 52 50 children with developmental coordination disorder. *Research in developmental*
- 53 51 *disabilities* 2009;31(2):345-9.
- 54 52 22. Henderson SE, Sugden DA, Barnett A. *Movement Assessment Battery for Children 2*
- 55 53 *Checklist*. London: Pearson, 2007.
- 56 54 23. Sugden D. *Developmental Coordination Disorder as a Specific Learning Difficulty. Leeds*
- 57 55 *Consensus Statement*. Cardiff: The Dyscovery Trust, 2006.



- 1  
2  
3 1 24. Godfrey S, Davies CT, Wozniak E, Barnes CA. Cardio-respiratory response to exercise in  
4 2 normal children. *Clinical science* 1971;40(5):419-31.  
5 3 25. Ziemann U, Ishii K, Borgheresi A, Yaseen Z, Battaglia F, Hallett M, et al. Dissociation of  
6 4 the pathways mediating ipsilateral and contralateral motor-evoked potentials in  
7 5 human hand and arm muscles. *J Physiol* 1999;518 ( Pt 3):895-906.  
8 6 26. Parfitt G, Shepherd P, Eston R. Reliability of effort production using the children's  
9 7 CALER and BABE perceived exertion scales. *Journal of Exercise Science and  
10 8 Fitness* 2007;5:49-55.  
11 9 27. Winter EM. *Sport and exercise physiology testing guidelines : the British Association of  
12 10 Sport and Exercise Sciences guide*. London: Routledge, 2007.  
13 11 28. Armstrong N, Welsman JR, Kirby BJ. Peak oxygen uptake and maturation in 12-yr olds.  
14 12 *Medicine and science in sports and exercise* 1998;30(1):165-9.  
15 13 29. Wolfe RR. The underappreciated role of muscle in health and disease. *Am J Clin Nutr*  
16 14 2006;84(3):475-82.  
17 15 30. Hansen JE, Casaburi R, Cooper DM, Wasserman K. Oxygen uptake as related to work  
18 16 rate increment during cycle ergometer exercise. *European journal of applied  
19 17 physiology and occupational physiology* 1988;57(2):140-5.  
20 18 31. Wasserman K, Sietsema K, Sue, D.Y, Stringer, W.W, Sun, X.G and Whipp, B.J.  
21 19 *Principles Of Exercise Testing & Interpretation: Including Pathophysiology And  
22 20 Clinical Applications*. 5th ed: Lippincott Williams and Wilkins., 2011.  
23 21 32. Schott N, Alof V, Hultsch D, Meermann D. Physical fitness in children with  
24 22 developmental coordination disorder. *Research Quarterly for Exercise and Sport*  
25 23 2007;78(5):438-50.  
26 24 33. Ruiz JR, Ortega FB, Rizzo NS, Villa I, Hurtig-Wennlof A, Oja L, et al. High  
27 25 cardiovascular fitness is associated with low metabolic risk score in children: the  
28 26 European Youth Heart Study. *Pediatric research* 2007;61(3):350-5.  
29 27 34. Anderssen SA, Cooper AR, Riddoch C, Sardinha LB, Harro M, Brage S, et al. Low  
30 28 cardiorespiratory fitness is a strong predictor for clustering of cardiovascular disease  
31 29 risk factors in children independent of country, age and sex. *Eur J Cardiovasc Prev  
32 30 Rehabil* 2007;14(4):526-31.  
33 31 35. Karila C, De Blic J, Waernessyckle S. Cardiopulmonary Exercise Testing in Children. An  
34 32 Individualized Protocol for Workload Increase. *Chest* 2001;120:81-87  
35 33 36. Buys R, Budts W, Reybrouck T, Gewillig M, Vanhees L. Serial exercise testing in  
36 34 children, adolescents and young adults with Senning repair for transposition of the  
37 35 great arteries. *BMC Cardiovasc Disord* 2012;12:88.  
38 36 37. ACSM. *ACSM's Guidelines For Exercise Testing And Prescription. Guidelines for graded  
39 37 exercise testing and training*. 7  
40 38 ed. Philadelphia: Lea and Febiger: Lippincott Williams and Wilkins, 2005.  
41 39 38. Riddell MC, Jammik VK, Iscoe KE, Timmons BW, Gledhill N. Fat oxidation rate and the  
42 40 exercise intensity that elicits maximal fat oxidation decreases with pubertal status in  
43 41 young male subjects. *J Appl Physiol* 2008;105(2):742-8.  
44 42 39. Verschuren O, Ketelaar M, Takken T, Helder PJ, Gorter JW. Exercise programs for  
45 43 children with cerebral palsy: a systematic review of the literature. *Am J Phys Med  
46 44 Rehabil* 2008;87(5):404-17.  
47 45 40. Raynor AJ. Strength, power, and coactivation in children with developmental  
48 46 coordination disorder. *Dev Med Child Neurol* 2001;43(10):676-84.  
49 47 41. Buchan DS, Ollis S, Thomas NE, Buchanan N, Cooper SM, Malina RM, et al. Physical  
50 48 activity interventions: effects of duration and intensity. *Scandinavian Journal of  
51 49 Medicine & Science in Sports* 2011;21(6):E341-E50.  
52 50 42. Hung WWY, Pang M. Y. C. Effects of group-based versus individual-based exercise  
53 51 training on motor performance in children with developmental coordination  
54 52 disorder: a randomized controlled pilot study. *Journal of Rehabilitation Medicine*  
55 53 2010;42:122-28.  
56 54  
57 54  
58 55  
59  
60



1  
2  
3  
4  
5  
6  
7  
8  
9  
10  
11  
12  
13  
14  
15  
16  
17  
18  
19  
20  
21  
22  
23  
24  
25  
26  
27  
28  
29  
30  
31  
32  
33  
34  
35  
36  
37  
38  
39  
40  
41  
42  
43  
44  
45  
46  
47  
48  
49  
50  
51  
52  
53  
54  
55  
56  
57  
58  
59  
60

1  
2  
3  
4  
5  
6  
7  
8  
9  
10  
11  
12  
13  
14  
15  
16  
17  
18  
19  
20  
21  
22  
23  
24  
25  
26  
27  
28  
29  
30  
31  
32  
33  
34  
35  
36  
37  
38  
39  
40  
41  
42  
43  
44  
45  
46  
47  
48  
49  
50  
51  
52  
53  
54  
55  
56  
57  
58  
59  
60

#### Article Focus

- Exercise tolerance was not limited by the HMI group not willing to push themselves maximally, with the level of motor impairment significantly related to  $VO_2$  peak and muscular strength.
- Children with HMI have a reduced movement economy during cycling exercise.

#### Key Messages

- Children with high motor impairment fail to exercise hard enough to maximally tax the cardiovascular system.
- Children with HMI are willing to push themselves maximally during exercise, despite limited exercise capacity. Utilising short duration, high intensity exercise bouts, focusing on the development of the exercising musculature, may be a better method for improving the limited fitness parameters in this population.

#### Strengths and Limitations

- Few studies have directly measured limiting factors to exercise alongside standard motor impairment tests.
- The use of cycle ergometry is a safe option for maximal testing, allowing participants to give a maximal effort. However, due to the nature of the exercise, the weakness in the exercising musculature may be accentuated.

1  
2  
3 1 **Motor Impairment** and its relationship to fitness in children  
4  
5 2  
6  
7 3 Martyn Morris  
8  
9 4 Helen Dawes  
10  
11 5 Ken Howells  
12  
13 6 Roel Janssen  
14  
15  
16 7 **Corresponding author**  
17  
18 8 Dr. Martyn Morris  
19  
20 9 Department of Sport and Health Sciences  
21  
22 10 Oxford Brookes University  
23  
24 11 Headington Campus  
25  
26 12 Gipsy Lane  
27  
28 13 Oxford OX3 0BP  
29  
30 14 U.K.  
31  
32 15 mgmorris@brookes.ac.uk  
33  
34  
35  
36  
37  
38 17 **Key words:** Motor impairment,  $\dot{V}O_2$  max, fitness, muscle  
39  
40 18 **Word count: 2621**  
41  
42  
43  
44  
45  
46  
47  
48  
49  
50  
51  
52  
53  
54  
55  
56  
57  
58  
59  
60

1  
2  
3 **Abstract**

4 **Background:** Children with movement impairments are known to perform poorly in  
5  
6  
7  
8  
9  
10  
11  
12  
13  
14  
15  
16  
17  
18  
19  
20  
21  
22  
23  
24  
25  
26  
27  
28  
29  
30  
31  
32  
33  
34  
35  
36  
37  
38  
39  
40  
41  
42  
43  
44  
45  
46  
47  
48  
49  
50  
51  
52  
53  
54  
55  
56  
57  
58  
59  
60  
exercise tests but the nature of the limiting factor is often unknown.

4 **Aim:** The aim of this work was to explore physiological and perceptual limits to  
5  
6  
7  
8  
9  
10  
11  
12  
13  
14  
15  
16  
17  
18  
19  
20  
21  
22  
23  
24  
25  
26  
27  
28  
29  
30  
31  
32  
33  
34  
35  
36  
37  
38  
39  
40  
41  
42  
43  
44  
45  
46  
47  
48  
49  
50  
51  
52  
53  
54  
55  
56  
57  
58  
59  
60  
exercise in children with varying degrees of motor impairment, and the relationships  
to measures of health.

7 **Methods:** 35 boys aged 12-15yrs completed the Movement ABC test for the  
8  
9  
10  
11  
12  
13  
14  
15  
16  
17  
18  
19  
20  
21  
22  
23  
24  
25  
26  
27  
28  
29  
30  
31  
32  
33  
34  
35  
36  
37  
38  
39  
40  
41  
42  
43  
44  
45  
46  
47  
48  
49  
50  
51  
52  
53  
54  
55  
56  
57  
58  
59  
60  
assessment of motor impairment, followed by an incremental cycle ergometer test to  
exhaustion for the assessment of maximal oxygen uptake ( $\dot{V}O_{2peak}$ ), respiratory  
exchange ratio (RER), heart rate (HR) and rating of perceived exertion (RPE).  
10 participants classified as having either high or low motor impairment also  
performed a maximal voluntary isometric contraction (MVIC) for the assessment of  
lower limb extensor strength.

14 **Results:** 18 boys were classified as having high motor impairment. All but one  
15  
16  
17  
18  
19  
20  
21  
22  
23  
24  
25  
26  
27  
28  
29  
30  
31  
32  
33  
34  
35  
36  
37  
38  
39  
40  
41  
42  
43  
44  
45  
46  
47  
48  
49  
50  
51  
52  
53  
54  
55  
56  
57  
58  
59  
60  
participant met the criteria for maximum effort, both perceptually and physiologically,  
in the exercise test. There was a significant difference in  $\dot{V}O_2$  peak (34.9 v 48.5  
ml.kg.min<sup>-1</sup>),  $\dot{V}O_2$  workload (12.5 v 10.0ml.W), maximal heart rate (176 v 188  
beats.min<sup>-1</sup>), maximal oxygen pulse (12.1 v 15.9 ml.beat) and MVIC (5.7 v 9.1  
Nm.kg) between the high and low motor impaired participants respectively. There  
was no significant difference in the RER or RPE between the groups.

21 **Conclusion:** When performing cycling ergometry, perceived exertion was not a  
22  
23  
24  
25  
26  
27  
28  
29  
30  
31  
32  
33  
34  
35  
36  
37  
38  
39  
40  
41  
42  
43  
44  
45  
46  
47  
48  
49  
50  
51  
52  
53  
54  
55  
56  
57  
58  
59  
60  
limiting factor in children with high motor impairment. The lower heart rate at  
exercise cessation, coupled with reduced movement efficiency and lower muscle  
strength reported in this group, would suggest exercise is limited by impairment at the  
muscular level. This finding was supported by the high RER values despite low

1  
2  
3 1 maximal heart rate values attained during the exercise test and reduced maximal  
4  
5 2 strength. Perception of effort is not heightened in children with high motor  
6  
7 3 impairment and future exercise interventions should be focused on improving  
8  
9  
10 4 muscular condition in participants with high motor impairment to enable them to be  
11  
12 5 better prepared to engage in physical activity for health.  
13  
14  
15  
16  
17  
18  
19  
20  
21  
22  
23  
24  
25  
26  
27  
28  
29  
30  
31  
32  
33  
34  
35  
36  
37  
38  
39  
40  
41  
42  
43  
44  
45  
46  
47  
48  
49  
50  
51  
52  
53  
54  
55  
56  
57  
58  
59  
60

## 1 Introduction

2 Physical activity levels in childhood have been shown to predict adult activity  
3 behavior<sup>1,2</sup>, affecting life expectancy and quality of life years. As such, successfully  
4 achieving an active lifestyle in childhood is critical. Children with movement  
5 difficulties and poor coordination tend to have lower levels of physical activity  
6 participation than their typically developing peers<sup>3-5</sup>. Further, this group of children,  
7 with reduced motor coordination and low activity levels, have been found to have  
8 significantly higher metabolic syndrome indicators<sup>6</sup>, including: abdominal adiposity,  
9 blood pressure and triglyceride levels compared to their typically developing peers<sup>7</sup>  
10<sup>8</sup>. Of added concern is that such motor impairments are known to persist into  
11 adulthood, further impacting on the ability of these individuals to achieve a physically  
12 active lifestyle as adults<sup>9-11</sup>. The number of people with some form of motor  
13 impairment in the UK population is 2.6 million<sup>12</sup> and as such this group is an  
14 important proportion of society who should be considered within public health policy.  
15 Understanding factors particularly affecting the exercise experience in these  
16 individuals is essential if higher physical activity levels are to be achieved.

17 **In a series of interviews with adolescents with Developmental Coordination Disorder**  
18 **(DCD)<sup>13,14</sup> and with children with cerebral palsy<sup>15</sup>**, exercise-induced symptoms of  
19 muscle fatigue, poor physical tolerance and low energy levels have also been  
20 reported as major factors reducing enjoyment, tolerance and participation. However,  
21 as yet, the underpinning physiological limits have not been fully explored. We know  
22 **that individual's judge** and limit effort during exercise from symptoms arising from  
23 muscles, joints and the cardiovascular system; choosing to reduce how hard they are  
24 exercising when symptoms become too strong<sup>16,17</sup>. Children with increased motor  
25 impairment are known to perform poorly in sport and exercise fitness screening tests

1  
2  
3 18<sup>19</sup>, but the physiological and perceptual responses limiting exercise performance  
4  
5 have not been explored in these individuals<sup>18 20 21</sup>.  
6

### 7 **Aims**

8  
9  
10 4 The study set out to explore, in individuals with different levels of motor impairment,  
11  
12 5 physiological and perceptual measures during and limiting maximal exercise  
13  
14 6 performance.  
15

### 16 **Methods**

#### 17 *Procedure*

18  
19  
20 9 The study was approved by the University Research Ethics Committee (UREC).  
21  
22 10 Participants were recruited through two routes, either through a database of those who  
23  
24 11 had taken part in our previous research or through advertisements and posters.  
25  
26 12 Families indicating that they were interested in taking part were sent separate child  
27  
28 13 and parent information sheets and gave their written consent prior to the study.  
29  
30 14 Participants attended the Human Performance Laboratory for testing, with parents  
31  
32 15 attending only to help complete a health screening questionnaire for their child. The  
33  
34 16 testing session consisted of the participant completing the Movement ABC-2 Test  
35  
36 17 (MABC-2)<sup>22</sup> for a measure of motor impairment, followed by the exercise testing.  
37  
38 18 Details of these measures can be found below.  
39  
40 19 Participants were asked to refrain from eating, performing exercise or drinking  
41  
42 20 caffeine in the 2-hour period before attending the sessions.  
43  
44  
45  
46  
47

48

#### 49 *Participants*

50  
51  
52 23 **Thirty five** males aged 12 to 15 years with no known neurological condition were  
53  
54 24 recruited. Individuals were classified on the level of motor ability using the  
55  
56 25 Movement ABC-2 test.  
57  
58  
59  
60

1  
2  
3 1 *Measures*

4  
5 2 Movement ABC-2 Test (MABC-2)<sup>22</sup>.

6  
7 3 This standardised test of motor skill was used to confirm the presence of significant  
8  
9 4 movement difficulties. Eight age appropriate items were individually administered as  
10  
11 5 described in the test manual. Raw scores for each task were converted to standard  
12  
13 6 scores, summed across three sub-sections to obtain a standard score for Manual  
14  
15 7 Dexterity, Aiming & Catching and Balance. A total test score and percentile rank was  
16  
17 8 also obtained. For the diagnosis of motor impairment, it has been recommended that  
18  
19 9 scores below the 5<sup>th</sup> percentile indicate definite motor impairment while scores  
20  
21 10 between the 5<sup>th</sup> and 15<sup>th</sup> percentile indicate borderline scores<sup>23</sup>. Therefore, any child  
22  
23 11 scoring below the 15<sup>th</sup> percentile in this current study was classed as having high  
24  
25 12 motor impairment (HMI).

26  
27  
28  
29 13 *Exercise testing*

30  
31  
32 14 Height (Holtain stadiometer), weight (Seca scales) and body mass index (BMI) were  
33  
34 15 recorded prior to the exercise test. After resting for 6 minutes participants underwent  
35  
36 16 an incremental cycle ergometer exercise test (Lode Excalibur Sport, Gronigen,  
37  
38 17 Netherlands) of 1 minute stages after an initial 2 minutes of unloaded cycling.  
39  
40 18 Workload was progressed based on the Godfrey protocol<sup>24</sup> (increasing workload by  
41  
42 19 15-20 Watts from unloaded cycling based on the height of the participant). The test  
43  
44 20 ended at volitional exhaustion or if the participant was unable to maintain a cadence  
45  
46 21 of 60 rpm, with verbal encouragement given throughout.

47  
48  
49 22 Pulmonary gas exchange was measured breath-by-breath using an automated  
50  
51 23 metabolic analysis system (Cortex Metalyzer, Leipzig Germany). The system was  
52  
53 24 calibrated prior to each test in accordance with manufacturer's instructions. All  
54  
55 25 participants wore a face mask covering the nose and mouth connected to a low-

1  
2  
3 1 resistance volume transducer (Triple V, Hoechberg, Germany). Heart rate was  
4  
5 2 recorded continuously throughout the testing protocol using short-range telemetry  
6  
7 3 (Polar S810, Finland). Oxygen uptake ( $\dot{V}O_2$ ) was calculated as the average  $\dot{V}O_2$  in the  
8  
9 4 last 30s of each stage, whilst  $\dot{V}O_2$  peak was recorded as the highest 60s average before  
10  
11 5 the termination of the test. The respiratory exchange ratio (RER) was calculated from  
12  
13 6 the ratio of  $\dot{V}CO_2$  to  $\dot{V}O_2$  at each workload level throughout the exercise test.  
14

15  
16  
17 7 Maximal fat oxidation was calculated using the equations of Frayn<sup>25</sup> in equation 1  
18  
19 8 below:

$$\text{Eq. 1 Fat oxidation (g.min)} = 1.67 \times \dot{V}O_2 - 1.67 \times \dot{V}CO_2$$

20  
21  
22 9  
23  
24 10 The relationship between the amount of oxygen utilised for a given work rate was  
25  
26 11 calculated from the linear slope of the relationship between  $\dot{V}O_2$  and Watts ( $\dot{V}O_2/W$ )  
27  
28 12 and was used as a measure of muscular efficiency. Oxygen pulse, a non-invasive  
29  
30 13 indicator of cardiac function, was calculated by dividing the  $\dot{V}O_2$  by heart rate  
31  
32 14 ( $\dot{V}O_2/HR$ ). Maximum workload ( $Workload_{max}$ ) was calculated as the final completed  
33  
34 15 workload. Rating of perceived exertion (RPE) was measured at the end of each stage  
35  
36 16 using the Cart and Load scale (CALER), which has previously been used to assess  
37  
38 17 children's perception of effort during exercise<sup>26</sup>. The CALER has a scale from 1 to  
39  
40 18 10 with 1 being classed as 'very easy' and 10 being 'so hard I'm going to stop'.  
41  
42 19 Illustrations of a child pulling a cart behind their bicycle, which was progressively  
43  
44 20 laden with bricks, accompanied the scale.  
45  
46  
47  
48  
49 21 The criteria for true maximal effort included a plateau in  $\dot{V}O_2$  max, maximal heart rate  
50  
51 22  $\geq 95\%$  of age predicted maximum and RER  $>1.06$ <sup>27</sup>. All children were fully  
52  
53 23 familiarised with the testing protocol prior to commencing the session.  
54  
55  
56  
57  
58  
59  
60



## 1 MVIC Protocol

2 Participants performed a 1RM leg extensor strength test on a specially designed  
3 isometric strength-testing chair. The knee angle was 90<sup>0</sup> and the rotation axis of the  
4 strength chair was aligned with the knee axis. Participants were asked to relax for 30  
5 seconds, thereafter subjects performed maximum knee extension for approximately 5  
6 seconds. Verbal encouragement was given to reach the maximum force. After this  
7 maximum knee extension subjects relaxed for 30 seconds. This test was repeated three  
8 times, 1RM was the maximum output reached.

9 Electrical signals from the torque transducer were amplified (Digitimer Neurolog  
10 NL107 Recorder Amplifier) and digitised (Cambridge Electronic Design, micro1401).  
11 Torque from maximal voluntary contractions (MVIC) was recorded on a PC for  
12 subsequent analysis using Spike data analysis software (Spike 2 Version 5.0 for  
13 Windows).

## 14 Data Analysis

15 Descriptive statistics (mean +/- SD, range) were calculated for all variables.  
16 All exercise testing measure distributions were examined for normality. Linear  
17 regression analysis was performed to examine relationships between M-ABC score  
18 and the exercise variables. Ten participants reporting high motor impairment returned  
19 to the laboratory to repeat the exercise test to establish reliability data in this  
20 population. Test re-test reliability was analysed to test for systematic and random  
21 error using student t-test, intraclass correlation coefficient (ICC) [3,1], bias (average  
22 difference) and random error (1.96 x SD of differences). Statistical significance was  
23 accepted at p<0.05.

24  
25  
26  
27

## 1 Results

### 4 *Movement ABC-2 Test*

5 Eighteen participants obtained total scores considered to be HMI, i.e. below the M-  
6 ABC 15<sup>th</sup> percentile, with 5 at or below the 5<sup>th</sup> percentile, and 17 classified as low  
7 motor impairment (LMI) (M-ABC > 15<sup>th</sup> percentile). Table 1 displays the participant  
8 characteristics from the test battery.

9 >>>>insert table 1 here

10

11 As expected, there was a significant difference in the Movement ABC percentile score  
12 between the HMI and LMI group (4.0 (4.7) v 62.8 (20.7), p<0.05).

13

### 14 *Exercise Testing*

15 There was a significant difference in  $\dot{V}O_2$  peak (34.9 (6.3) v 48.5 (7.9) ml.kg.min<sup>-1</sup>),  
16  $\dot{V}O_2$ /workload (12.5 (3.9) v 10.0 (1.3)  $\dot{V}O_2$ /W), oxygen pulse (12.1 (3.7) v 15.9 (4.0)  
17 ml.beat), maximum heart rate (176 (19.7) v 188 (8.8) beats.min) and MVIC (5.7 (1.0)  
18 v 9.0 (1.8) Nm.kg) with the LMI group achieving higher  $\dot{V}O_2$ , oxygen pulse,  
19 maximum heart rate and MVIC.

20 There was no difference between the groups in the respiratory exchange ratio (RER),  
21 with all but one participant demonstrating a maximal value greater than 1.0 at the end  
22 of the test. There was also no significant difference in maximal fat oxidation levels  
23 between the groups.

24 Compared to established maximal criteria for typically developing children<sup>28</sup> all but  
25 one of the participants met the criteria for a maximal effort during the exercise test,  
26 with no significant difference between the HMI and LMI groups. There was no  
27 difference in the perception of effort throughout the exercise trial and at exercise

1  
2  
3 1 termination, with all participants reporting an RPE rating of 9 or 10 at the end of the  
4  
5 2 test, despite individuals in the HMI group having significantly lower maximum HR  
6  
7 3 values at the end of the cycle ergometer test.  
8  
9  
10 4

11  
12 5 There were significant relationships between the MABC score and  $\dot{V}O_2$  peak ( $r = 0.36$ ,  
13  
14 6  $p < 0.05$ ) (figure 1) and MVIC ( $r = 0.76$ ,  $p < 0.01$ ) (figure 2).  
15  
16  
17 7

18 8  
19  
20  
21 9 Figure 1. Relationship between M-ABC score and  $\dot{V}O_2$  peak.  
22

23 10 Table 2 below displays the characteristics of the participants who undertook the  
24  
25 11 MVIC testing  
26

27 12  
28  
29  
30 13 >>>>>>insert table 2 here  
31

32 14  
33  
34 15 Figure 2. Relationship between M-ABC score and MVIC.  
35  
36 16

### 37 17 *Test re-test reliability of exercise measures*

38  
39  
40 18 10 HMI participants returned to the laboratory to complete a second maximal exercise  
41  
42 19 test for the assessment of reliability in this population. The maximal exercise data  
43  
44 20 demonstrated good reliability with ICC scores for  $\dot{V}O_2$  peak 0.75 (CI 0.23-0.94; t 0.39,  
45  
46 21 bias 3.54, random error 6.93), maximal heart rate 0.93 (CI 0.73-0.98; t -0.86, bias 7.8,  
47  
48 22 random error 15.4) and maximal RER 0.89 (CI 0.59-0.98; t -0.14, bias 0.07, random  
49  
50 23 error 0.14). Maximal RPE ICC scores were all rated 9-10 thus affecting the ICC 0.05  
51  
52 24 (CI -0.60-0.66), but had a low bias (t -2.14, bias 0.86, random error 1.68).  
53  
54  
55  
56 25

### 57 58 26 **Discussion**

59  
60

1  
2  
3 1 The study set out to explore, in individuals with different levels of motor impairment,  
4  
5 2 physiological and perceptual factors during and limiting maximal exercise  
6  
7 3 performance. Examination of the exercise test data showed a significant difference in  
8  
9 4  $\dot{V}O_2$  peak,  $\dot{V}O_2$ / workload, oxygen pulse, maximum heart rate and MVIC between the  
10  
11 5 HMI and LMI group. Interestingly there was no difference maximal rating of  
12  
13 6 perceived exertion or RER. When considering limits to exercise in people with high  
14  
15 7 motor impairment, the maximal RER and fat oxidation levels at test termination,  
16  
17 8 suggest low levels of aerobic muscle performance and not a heightened perceived  
18  
19 9 level of exertion, were limiting exercise performance. These findings are important as  
20  
21 10 they highlight a low level of aerobic muscle performance as a major factor limiting  
22  
23 11 exercise performance in children with poor coordination. Muscle plays a central role  
24  
25 12 in health and disease across the lifespan<sup>29</sup> and, if left unaddressed in children with  
26  
27 13 HMI, is likely to continue into adulthood and contribute to the development of  
28  
29 14 metabolic disorders in this population.  
30  
31  
32  
33  
34  
35  
36

37 16 Despite children with HMI demonstrating a linear  $\dot{V}O_2$ / workload response, the value  
38  
39 17 of 12.5 (3.9) ml.W reflects a reduced movement economy throughout the exercise<sup>30</sup>.  
40  
41 18  $\dot{V}O_2$  normally rises at a rate of about 8.5-11 ml.min.watt and is independent of sex,  
42  
43 19 age, body weight or height<sup>31</sup>. Thus, in children with HMI, exercise participation may  
44  
45 20 be limited by the impaired ability of the muscle to work aerobically. The reduced  
46  
47 21 muscular strength of the quadriceps reported in this study further supports the main  
48  
49 22 limiting factor being at the muscular level and this finding supports the findings from  
50  
51 23 previous studies citing a reduced strength in other muscle groups in children with  
52  
53 24 greater motor impairment<sup>32</sup>.  
54  
55  
56  
57  
58  
59  
60

1  
2  
3 1 In comparison to the LMI group, the HMI group had a reduced exercise capacity, with  
4  
5 2 a mean  $\dot{V}O_2$  peak of 34.9 ml.kg.min<sup>-1</sup>. The  $\dot{V}O_2$  peak was below the cardiovascular  
6  
7 3 fitness threshold in the HMI children<sup>33</sup> and as such associated with an increased risk  
8  
9 4 of obesity, Type II diabetes and cardiovascular and metabolic disorders in adulthood  
10  
11 5<sup>34</sup>. Considered alongside the low maximum heart rates demonstrated by these  
12  
13 6 children (mean 176 beats.min<sup>-1</sup>) in comparison to LMI participants (188 beats.min<sup>-1</sup>)  
14  
15 7 and those reported in normal healthy children at the end of a similar cycling protocol  
16  
17 8<sup>35</sup>, our findings suggest that a low level of aerobic muscle performance was limiting  
18  
19 9 the ability of children with HMI to push themselves hard enough to maximally tax the  
20  
21 10 cardiovascular system. Despite a significantly lower oxygen pulse level between the  
22  
23 11 groups (12.1 (3.7) v 15.9 (4.0)ml.beat, p<0.05), the HMI group was not different to  
24  
25 12 those in healthy individuals reported previously<sup>36</sup>. This further supports the findings  
26  
27 13 that the limiting factor is of peripheral, and not central, origin. Given the emerging  
28  
29 14 role of mitochondrial dysfunction in many neuromuscular disorders, a lack of aerobic  
30  
31 15 capability in the muscles of children with poor motor control may impact on their  
32  
33 16 long-term health and may prevent them from increasing their heart rate to the level  
34  
35 17 required to achieve an aerobic training stimulus and attain fitness, health and  
36  
37 18 wellbeing benefits according to current guidelines for physical activity in children<sup>37</sup>.  
38  
39 19 Interestingly, despite the reduced aerobic fitness there was no difference in the  
40  
41 20 utilisation of fat as a substrate during the exercise protocol between the groups in this  
42  
43 21 study. The levels of fat oxidation in this current study were within the range  
44  
45 22 previously reported in healthy participants of similar age<sup>38</sup>. The number of  
46  
47 23 individuals in this sample is relatively small, however we included a range of  
48  
49 24 individuals with different motor capabilities and in the sub group of HMI participants  
50  
51  
52  
53  
54  
55  
56  
57  
58  
59  
60

1  
2  
3 1 that returned to the laboratory we established good reliability in the clinical exercise  
4  
5 2 testing in this population.

6  
7 3 Muscle function has been found to have an important role in long term health <sup>29</sup> and  
8  
9 4 considering our observation of reduced muscle capacity in individuals with HMI, it is  
10  
11 5 important to investigate interventions that can be implemented in childhood to  
12  
13 6 improve muscle function and performance <sup>39</sup>. This is further supported with the  
14  
15 7 significantly lower MVIC in the HMI group in comparison to LMI. The reduced  
16  
17 8 strength of the major locomotor muscle group in the HMI not only has implications  
18  
19 9 for function, with some reports of increased co-contraction <sup>40</sup>, but also for the impact  
20  
21 10 on health and quality of life. In a recent study by Buchan et al. <sup>41</sup>, high intensity  
22  
23 11 exercise has been shown to reduce cardiovascular risk and improve muscle function in  
24  
25 12 healthy children. As yet, this type of intensity has not been investigated in the  
26  
27 13 population of children included in this current study, however the evidence of their  
28  
29 14 willingness to push themselves maximally in this study warrants the application of  
30  
31 15 such intensities of exercise to measure the impact on health and movement measures.  
32  
33  
34  
35

36 16 Work by Cairney et.al. <sup>18</sup> suggested that reduced exercise performance of children with  
37  
38 17 motor impairment was partly related to the level of perceived adequacy for the task.  
39  
40 18 The findings of this current work suggest that the limitations to exercise in the high  
41  
42 19 motor impairment group had strong physiological underpinnings reflected in the  
43  
44 20 criteria for a maximal effort being attained in all but one of the participants.  
45  
46  
47  
48

49  
50 22 The findings from this work highlight the significant relationship between motor  
51  
52 23 impairment level and health status. The reduced exercise capacity and muscular  
53  
54 24 performance demonstrated by the participants with greater motor impairment  
55  
56 25 highlight the need for any exercise interventions to target the development of  
57  
58  
59  
60

1  
2  
3 1 muscular function. Research has shown that exercise interventions play a possible  
4  
5 2 role in improving motor competence levels in children with movement difficulties <sup>42</sup>  
6  
7 3 however, how these changes relate to alterations in markers of cardiovascular and  
8  
9 4 muscular health and the long term involvement in physical activity have yet to be  
10  
11 5 elucidated.  
12  
13  
14  
15  
16  
17  
18  
19  
20  
21  
22  
23  
24  
25  
26  
27  
28  
29

### 30 **Contributorship statement**

31  
32 14 Dr. Martyn Morris, Prof. Helen Dawes and Roel Janssen - Conception and design,  
33  
34 15 acquisition of data or analysis and interpretation of data, and drafting the article or  
35  
36 16 revising it critically for important intellectual content.  
37  
38 17 Dr Ken Howells - Conception and design and drafting the article or revising it critically  
39  
40 18 for important intellectual content.  
41  
42  
43  
44  
45  
46  
47

### 48 **References**

- 49  
50 1. Powell KE, Dysinger W. Childhood participation in organized school sports and physical  
51 26 education as precursors of adult physical activity. *American Journal of Preventative*  
52 27 *Medicine* 1987;3(5):276-81.  
53 28 2. Rejeski WJ, Miller ME, King AC, Studenski SA, Katula JA, Fielding RA, et al. Predictors  
54 29 of adherence to physical activity in the Lifestyle Interventions and Independence for  
55 30 Elders pilot study (LIFE-P). *Clin Interv Aging* 2007;2(3):485-94.  
56 31 3. Poulsen AA, Ziviani JM, Cuskelly M. Leisure time physical activity energy expenditure in  
57 32 boys with developmental coordination disorder: The role of peer relations self-  
58 33 concept perceptions. *Otjr-Occupation Participation and Health* 2008;28(1):30-39.



- 1 4. Haga M. Physical fitness in children with high motor competence is different from that in  
2 children with low motor competence. *Phys Ther* 2009;89(10):1089-97.
- 3 5. Calley A, Williams S, Reid S, Blair E, Valentine J, Girdler S, et al. A comparison of  
4 activity, participation and quality of life in children with and without spastic diplegia  
5 cerebral palsy. *Disabil Rehabil* 2012;34(15):1306-10.
- 6 6. Zimmet P, Alberti KG, Kaufman F, Tajima N, Silink M, Arslanian S, et al. The metabolic  
7 syndrome in children and adolescents - an IDF consensus report. *Pediatr Diabetes*  
8 2007;8(5):299-306.
- 9 7. Wahi G, LeBlanc PJ, Hay JA, Faught BE, O'Leary D, Cairney J. Metabolic syndrome in  
10 children with and without developmental coordination disorder. *Research in*  
11 *Developmental Disabilities* 2011;32(6):2785-89.
- 12 8. Maffei C, Zaffanello M, Pellegrino M, Banzato C, Bogoni G, Viviani E, et al. Nutrient  
13 oxidation during moderately intense exercise in obese prepubertal boys. *J Clin*  
14 *Endocrinol Metab* 2005;90(1):231-6.
- 15 9. Powell KE, Dysinger W. Childhood participation in organized school sports and physical  
16 education as precursors of adult physical activity. *American journal of preventive*  
17 *medicine* 1987;3(5):276-81.
- 18 10. Kirby A, Edwards L, Sugden D, Rosenblum S. The development and standardization of  
19 the Adult Developmental Co-ordination Disorders/Dyspraxia Checklist (ADC).  
20 *Research in Developmental Disabilities* 2010;31(1):131-39.
- 21 11. Heymsfield SB, Thomas D, Bosy-Westphal A, Shen W, Peterson CM, Muller MJ.  
22 Evolving concepts on adjusting human resting energy expenditure measurements for  
23 body size. *Obes Rev*;13(11):1001-14.
- 24 12. ODI. Disability statistics and research, 2013.
- 25 13. Barnett A, Dawes H, Morris M, Wilmot K, Howells K. Barriers and facilitators to  
26 participation in physical activity in teenagers with Developmental Coordination  
27 Disorder. *British Psychological Society, Developmental Section Annual Conference*.  
28 University of Nottingham & Nottingham Trent University, 2009.
- 29 14. Barnett A, Dawes, H, Wilmot, K. Constraints and facilitators to participation in physical  
30 activity in teenagers with Developmental Co-ordination Disorder: an exploratory  
31 interview study. *Child: Care, Health and Development* 2012.
- 32 15. Buffart LM, Westendorp T, van den Berg-Emons RJ, Stam HJ, Roebroek ME. Perceived  
33 barriers to and facilitators of physical activity in young adults with childhood-onset  
34 physical disabilities. *J Rehabil Med* 2009;41(11):881-5.
- 35 16. Rejeski W. Not what, but how one feels: the measurement of affect during exercise.  
36 *Journal of Sport & Exercise Psychology* 1989;11:304-17.
- 37 17. Weiser PC, and Stamper, D.A. Psychophysiological interactions leading to increased  
38 effort, leg fatigue, and respiratory distress during prolonged strenuous bicycle riding.  
39 In: Borg G, editor. *Physical Work and Effort*. Oxford: Pergamon Press, 1977.
- 40 18. Cairney J, Hay JA, Wade TJ, Faught BE, Flouris A. Developmental coordination disorder  
41 and aerobic fitness: Is it all in their heads or is measurement still the problem?  
42 *American Journal of Human Biology* 2006;18(1):66-70.
- 43 19. Schott N, Alof V, Hultsch D, Meermann D. Physical fitness in children with  
44 developmental coordination disorder. *Research quarterly for exercise and sport*  
45 2007;78(5):438-50.
- 46 20. Chia LC, Guelfi KJ, Licari MK. A comparison of the oxygen cost of locomotion in  
47 children with and without developmental coordination disorder. *Developmental*  
48 *medicine and child neurology* 2009;52(3):251-55.
- 49 21. Wu SK, Lin HH, Li YC, Tsai CL, Cairney J. Cardiopulmonary fitness and endurance in  
50 children with developmental coordination disorder. *Research in developmental*  
51 *disabilities* 2009;31(2):345-9.
- 52 22. Henderson SE, Sugden DA, Barnett A. *Movement Assessment Battery for Children 2*  
53 *Checklist*. London: Pearson, 2007.
- 54 23. Sugden D. *Developmental Coordination Disorder as a Specific Learning Difficulty. Leeds*  
55 *Consensus Statement*. Cardiff: The Dyscovery Trust, 2006.



- 1  
2  
3 1 24. Godfrey S, Davies CT, Wozniak E, Barnes CA. Cardio-respiratory response to exercise in  
4 2 normal children. *Clinical science* 1971;40(5):419-31.  
5 3 25. Ziemann U, Ishii K, Borgheresi A, Yaseen Z, Battaglia F, Hallett M, et al. Dissociation of  
6 4 the pathways mediating ipsilateral and contralateral motor-evoked potentials in  
7 5 human hand and arm muscles. *J Physiol* 1999;518 ( Pt 3):895-906.  
8 6 26. Parfitt G, Shepherd P, Eston R. Reliability of effort production using the children's  
9 7 CALER and BABE perceived exertion scales. *Journal of Exercise Science and*  
10 8 *Fitness* 2007;5:49-55.  
11 9 27. Winter EM. *Sport and exercise physiology testing guidelines : the British Association of*  
12 10 *Sport and Exercise Sciences guide*. London: Routledge, 2007.  
13 11 28. Armstrong N, Welsman JR, Kirby BJ. Peak oxygen uptake and maturation in 12-yr olds.  
14 12 *Medicine and science in sports and exercise* 1998;30(1):165-9.  
15 13 29. Wolfe RR. The underappreciated role of muscle in health and disease. *Am J Clin Nutr*  
16 14 2006;84(3):475-82.  
17 15 30. Hansen JE, Casaburi R, Cooper DM, Wasserman K. Oxygen uptake as related to work  
18 16 rate increment during cycle ergometer exercise. *European journal of applied*  
19 17 *physiology and occupational physiology* 1988;57(2):140-5.  
20 18 31. Wasserman K, Sietsema K, Sue, D.Y, Stringer, W.W, Sun, X.G and Whipp, B.J.  
21 19 *Principles Of Exercise Testing & Interpretation: Including Pathophysiology And*  
22 20 *Clinical Applications*. 5th ed: Lippincott Williams and Wilkins., 2011.  
23 21 32. Schott N, Alof V, Hultsch D, Meermann D. Physical fitness in children with  
24 22 developmental coordination disorder. *Research Quarterly for Exercise and Sport*  
25 23 2007;78(5):438-50.  
26 24 33. Ruiz JR, Ortega FB, Rizzo NS, Villa I, Hurtig-Wennlof A, Oja L, et al. High  
27 25 cardiovascular fitness is associated with low metabolic risk score in children: the  
28 26 European Youth Heart Study. *Pediatric research* 2007;61(3):350-5.  
29 27 34. Anderssen SA, Cooper AR, Riddoch C, Sardinha LB, Harro M, Brage S, et al. Low  
30 28 cardiorespiratory fitness is a strong predictor for clustering of cardiovascular disease  
31 29 risk factors in children independent of country, age and sex. *Eur J Cardiovasc Prev*  
32 30 *Rehabil* 2007;14(4):526-31.  
33 31 35. Karila C, De Blic J, Waernessyckle S. Cardiopulmonary Exercise Testing in Children. An  
34 32 Individualized Protocol for Workload Increase. *Chest* 2001;120:81-87  
35 33 36. Buys R, Budts W, Reybrouck T, Gewillig M, Vanhees L. Serial exercise testing in  
36 34 children, adolescents and young adults with Senning repair for transposition of the  
37 35 great arteries. *BMC Cardiovasc Disord* 2012;12:88.  
38 36 37. ACSM. *ACSM's Guidelines For Exercise Testing And Prescription. Guidelines for graded*  
39 37 *exercise testing and training*. 7  
40 38 ed. Philadelphia: Lea and Febiger: Lippincott Williams and Wilkins, 2005.  
41 39 38. Riddell MC, Jamnik VK, Iscoe KE, Timmons BW, Gledhill N. Fat oxidation rate and the  
42 40 exercise intensity that elicits maximal fat oxidation decreases with pubertal status in  
43 41 young male subjects. *J Appl Physiol* 2008;105(2):742-8.  
44 42 39. Verschuren O, Ketelaar M, Takken T, Helder PJ, Gorter JW. Exercise programs for  
45 43 children with cerebral palsy: a systematic review of the literature. *Am J Phys Med*  
46 44 *Rehabil* 2008;87(5):404-17.  
47 45 40. Raynor AJ. Strength, power, and coactivation in children with developmental  
48 46 coordination disorder. *Dev Med Child Neurol* 2001;43(10):676-84.  
49 47 41. Buchan DS, Ollis S, Thomas NE, Buchanan N, Cooper SM, Malina RM, et al. Physical  
50 48 activity interventions: effects of duration and intensity. *Scandinavian Journal of*  
51 49 *Medicine & Science in Sports* 2011;21(6):E341-E50.  
52 50 42. Hung WWY, Pang M. Y. C. Effects of group-based versus individual-based exercise  
53 51 training on motor performance in children with developmental coordination  
54 52 disorder: a randomized controlled pilot study. *Journal of Rehabilitation Medicine*  
55 53 2010;42:122-28.  
56 54  
57 54  
58 55  
59  
60

1  
2  
3 1  
4  
5 2  
6  
7 3  
8  
9 4  
10  
11 5  
12  
13 6  
14  
15 7  
16  
17 8  
18  
19 9  
20  
21 10  
22  
23 11  
24  
25 12  
26  
27 13  
28  
29 14  
30  
31 15  
32  
33 16  
34  
35 17  
36  
37 18  
38  
39 19  
40  
41 20  
42  
43 21  
44  
45 22  
46  
47 23  
48  
49 24  
50  
51 25  
52  
53 26  
54  
55 27  
56  
57  
58  
59  
60

#### Article Focus

- Exercise tolerance was not limited by the HMI group not willing to push themselves maximally, with the level of motor impairment significantly related to VO<sub>2</sub> peak and muscular strength.
- Children with HMI have a reduced movement economy during cycling exercise.

#### Key Messages

- Children with high motor impairment fail to exercise hard enough to maximally tax the cardiovascular system.
- Children with HMI are willing to push themselves maximally during exercise, despite limited exercise capacity. Utilising short duration, high intensity exercise bouts, focusing on the development of the exercising musculature, may be a better method for improving the limited fitness parameters in this population.

#### Strengths and Limitations

- Few studies have directly measured limiting factors to exercise alongside standard motor impairment tests.
- The use of cycle ergometry is a safe option for maximal testing, allowing participants to give a maximal effort. However, due to the nature of the exercise, the weakness in the exercising musculature may be accentuated.

1  
2  
3  
4  
5  
6  
7  
8  
9  
10  
11  
12  
13  
14  
15  
16  
17  
18  
19  
20  
21  
22  
23  
24  
25  
26  
27  
28  
29  
30  
31  
32  
33  
34  
35  
36  
37  
38  
39  
40  
41  
42  
43  
44  
45  
46  
47  
48  
49  
50  
51  
52  
53  
54  
55  
56  
57  
58  
59  
60



Figure 1. Relationship between M-ABC score and  $\dot{V}O_2$  peak.

Figure 1. Relationship between M-ABC score and peak.  
137x96mm (300 x 300 DPI)

view only

1  
2  
3  
4  
5  
6  
7  
8  
9  
10  
11  
12  
13  
14  
15  
16  
17  
18  
19  
20  
21  
22  
23  
24  
25  
26  
27  
28  
29  
30  
31  
32  
33  
34  
35  
36  
37  
38  
39  
40  
41  
42  
43  
44  
45  
46  
47  
48  
49  
50  
51  
52  
53  
54  
55  
56  
57  
58  
59  
60

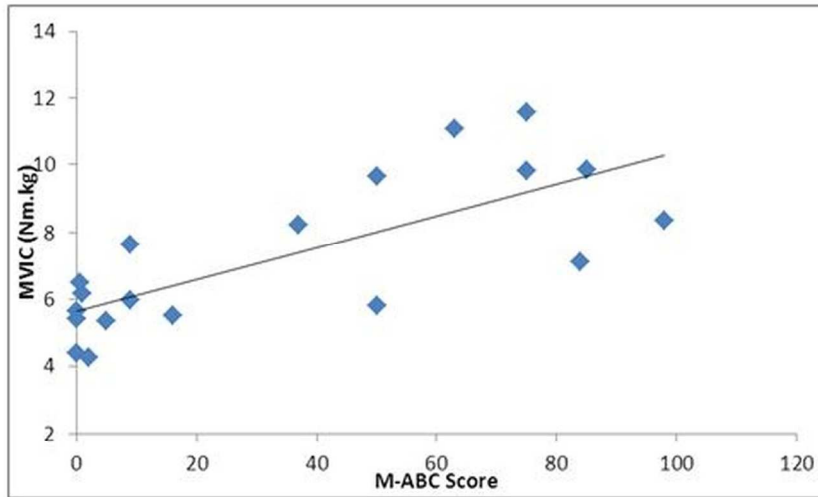

Figure 2. Relationship between M-ABC score andMVIC.

Figure 2. Relationship between M-ABC score and MVIC.  
155x106mm (300 x 300 DPI)

view only

Table 1. Participant characteristics and outcome measures.

|                                  | LMC (n=18)  | HMC (n=17)   |
|----------------------------------|-------------|--------------|
| M-ABC                            | 4.0 (4.7)   | 62.8 (20.7)* |
| Age (yrs)                        | 14.1 (1.5)  | 14.9 (0.9)   |
| Height (m)                       | 1.70 (0.10) | 1.74 (0.10)  |
| Weight (kg)                      | 62.8 (17.9) | 60.3 (10.6)  |
| BMI                              | 21.5 (4.0)  | 19.5 (2.1)   |
| VO <sub>2</sub> max (ml.kg.min)  | 34.9 (6.3)  | 48.5 (7.9)*  |
| VO <sub>2</sub> /Workload (ml.W) | 12.5 (3.9)  | 10.0 (1.3)*  |
| O <sub>2</sub> Pulse (ml.beat)   | 12.1 (3.7)  | 15.9 (4.0)*  |
| Heart Rate max. (beats.min)      | 176 (19.7)  | 188 (8.8)*   |
| RER max.                         | 1.15 (0.09) | 1.18 (0.09)  |
| RPE max.                         | 9.1 (1.5)   | 9.6 (0.5)    |

Table 2. M-ABC and MVIC for the LMC and HMC participants.

|              | LMC (n=10) | HMC (n=10)   |
|--------------|------------|--------------|
| M-ABC        | 4.3 (5.4)  | 68.6 (19.9)* |
| MVIC (Nm.kg) | 5.7 (1.0)  | 9.0 (1.8)*   |

For peer review only



## Motor Impairment and its relationship to fitness in children

|                                 |                                                                                                                                                                                                                                 |
|---------------------------------|---------------------------------------------------------------------------------------------------------------------------------------------------------------------------------------------------------------------------------|
| Journal:                        | <i>BMJ Open</i>                                                                                                                                                                                                                 |
| Manuscript ID:                  | bmjopen-2013-002909.R2                                                                                                                                                                                                          |
| Article Type:                   | Research                                                                                                                                                                                                                        |
| Date Submitted by the Author:   | 01-Jun-2013                                                                                                                                                                                                                     |
| Complete List of Authors:       | Morris, Martyn; Oxford Brookes University, Sport and Health Sciences<br>Dawes, Helen; Oxford Brookes University, Sport and Health Science<br>Howells, Ken; Oxford Brookes University, Sport and Health Science<br>Janssen, Roel |
| <b>Primary Subject Heading</b>: | Paediatrics                                                                                                                                                                                                                     |
| Secondary Subject Heading:      | Paediatrics, Sports and exercise medicine                                                                                                                                                                                       |
| Keywords:                       | PAEDIATRICS, Muscle, Health, Motor competence                                                                                                                                                                                   |
|                                 |                                                                                                                                                                                                                                 |

SCHOLARONE™  
Manuscripts

Peer Review Only

1  
2  
3 1 **Motor Impairment and its relationship to fitness in children**  
4  
5 2  
6  
7 3 Martyn Morris  
8  
9 4 Helen Dawes  
10  
11 5 Ken Howells  
12  
13 6 Roel Janssen  
14  
15  
16 7 **Corresponding author**  
17  
18 8 Dr. Martyn Morris  
19  
20 9 Department of Sport and Health Sciences  
21  
22 10 Oxford Brookes University  
23  
24 11 Headington Campus  
25  
26 12 Gipsy Lane  
27  
28 13 Oxford OX3 0BP  
29  
30 14 U.K.  
31  
32 15 mgmorris@brookes.ac.uk  
33  
34  
35  
36  
37  
38 17 **Key words:** Motor impairment,  $\dot{V}O_2$  max, fitness, muscle  
39  
40 18 **Word count: 2621**  
41  
42  
43  
44  
45  
46  
47  
48  
49  
50  
51  
52  
53  
54  
55  
56  
57  
58  
59  
60



## 1 ARTICLE SUMMARY

### 2 Article Focus

- 3 • Exercise tolerance was not limited by the HMI group not willing to push  
4 themselves maximally, with the level of motor impairment significantly  
5 related to VO<sub>2</sub> peak and muscular strength.
- 6 • Children with HMI have a reduced movement economy during cycling  
7 exercise.

### 8 Key Messages

- 9 • Children with high motor impairment fail to exercise hard enough to  
10 maximally tax the cardiovascular system.
- 11 • Children with HMI are willing to push themselves maximally during  
12 exercise, despite limited exercise capacity. Utilising short duration, high  
13 intensity exercise bouts, focusing on the development of the exercising  
14 musculature, may be a better method for improving the limited fitness  
15 parameters in this population.

### 16 Strengths and Limitations

- 17 • Few studies have directly measured limiting factors to exercise alongside  
18 standard motor impairment tests.
- 19 • The use of cycle ergometry is a safe option for maximal testing, allowing  
20 participants to give a maximal effort. However, due to the nature of the  
21 exercise, the weakness in the exercising musculature may be accentuated.  
22

1  
2  
3 **Abstract**

4 **Background:** Children with movement impairments are known to perform poorly in  
5  
6  
7  
8  
9  
10  
11  
12  
13  
14  
15  
16  
17  
18  
19  
20  
21  
22  
23  
24  
25  
26  
27  
28  
29  
30  
31  
32  
33  
34  
35  
36  
37  
38  
39  
40  
41  
42  
43  
44  
45  
46  
47  
48  
49  
50  
51  
52  
53  
54  
55  
56  
57  
58  
59  
60  
exercise tests but the nature of the limiting factor is often unknown.

4 **Aim:** The aim of this work was to explore physiological and perceptual limits to  
5  
6  
7  
8  
9  
10  
11  
12  
13  
14  
15  
16  
17  
18  
19  
20  
21  
22  
23  
24  
25  
26  
27  
28  
29  
30  
31  
32  
33  
34  
35  
36  
37  
38  
39  
40  
41  
42  
43  
44  
45  
46  
47  
48  
49  
50  
51  
52  
53  
54  
55  
56  
57  
58  
59  
60  
exercise in children with varying degrees of motor impairment, and the relationships  
to measures of health.

7 **Methods:** 35 boys aged 12-15yrs completed the Movement ABC test for the  
8  
9  
10  
11  
12  
13  
14  
15  
16  
17  
18  
19  
20  
21  
22  
23  
24  
25  
26  
27  
28  
29  
30  
31  
32  
33  
34  
35  
36  
37  
38  
39  
40  
41  
42  
43  
44  
45  
46  
47  
48  
49  
50  
51  
52  
53  
54  
55  
56  
57  
58  
59  
60  
assessment of motor impairment, followed by an incremental cycle ergometer test to  
exhaustion for the assessment of maximal oxygen uptake ( $\dot{V}O_{2peak}$ ), respiratory  
exchange ratio (RER), heart rate (HR) and rating of perceived exertion (RPE).  
10 participants classified as having either high or no motor impairment also  
performed a maximal voluntary isometric contraction (MVIC) for the assessment of  
lower limb extensor strength.

14 **Results:** 18 boys were classified as having high motor impairment. All but one  
15  
16  
17  
18  
19  
20  
21  
22  
23  
24  
25  
26  
27  
28  
29  
30  
31  
32  
33  
34  
35  
36  
37  
38  
39  
40  
41  
42  
43  
44  
45  
46  
47  
48  
49  
50  
51  
52  
53  
54  
55  
56  
57  
58  
59  
60  
participant met the criteria for maximum effort, both perceptually and physiologically,  
in the exercise test. There was a significant difference in  $\dot{V}O_2$  peak (34.9 v 48.5  
ml.kg.min<sup>-1</sup>),  $\dot{V}O_2$  workload (12.5 v 10.0ml.W), maximal heart rate (176 v 188  
beats.min<sup>-1</sup>), maximal oxygen pulse (12.1 v 15.9 ml.beat) and MVIC (5.7 v 9.1  
Nm.kg) between the high and non motor impaired participants respectively. There  
was no significant difference in the RER or RPE between the groups.

21 **Conclusion:** When performing cycling ergometry, perceived exertion was not a  
22  
23  
24  
25  
26  
27  
28  
29  
30  
31  
32  
33  
34  
35  
36  
37  
38  
39  
40  
41  
42  
43  
44  
45  
46  
47  
48  
49  
50  
51  
52  
53  
54  
55  
56  
57  
58  
59  
60  
limiting factor in children with high motor impairment. The lower heart rate at  
exercise cessation, coupled with reduced movement efficiency and lower muscle  
strength reported in this group, would suggest exercise is limited by impairment at the  
muscular level. This finding was supported by the high RER values despite low

1  
2  
3 1 maximal heart rate values attained during the exercise test and reduced maximal  
4  
5 2 strength. Perception of effort is not heightened in children with high motor  
6  
7 3 impairment and future exercise interventions should be focused on improving  
8  
9  
10 4 muscular condition in participants with high motor impairment to enable them to be  
11  
12 5 better prepared to engage in physical activity for health.  
13  
14  
15  
16  
17  
18  
19  
20  
21  
22  
23  
24  
25  
26  
27  
28  
29  
30  
31  
32  
33  
34  
35  
36  
37  
38  
39  
40  
41  
42  
43  
44  
45  
46  
47  
48  
49  
50  
51  
52  
53  
54  
55  
56  
57  
58  
59  
60

## 1 Introduction

2 Physical activity levels in childhood have been shown to predict adult activity  
3 behavior<sup>1,2</sup>, affecting life expectancy and quality of life years. As such, successfully  
4 achieving an active lifestyle in childhood is critical. Children with movement  
5 difficulties and poor coordination tend to have lower levels of physical activity  
6 participation than their typically developing peers<sup>3-5</sup>. Further, this group of children,  
7 with reduced motor coordination and low activity levels, have been found to have  
8 significantly higher metabolic syndrome indicators<sup>6</sup>, including: abdominal adiposity,  
9 blood pressure and triglyceride levels compared to their typically developing peers<sup>7</sup>  
10<sup>8</sup>. Of added concern is that such motor impairments are known to persist into  
11 adulthood, further impacting on the ability of these individuals to achieve a physically  
12 active lifestyle as adults<sup>9-11</sup>. The number of people with some form of motor  
13 impairment in the UK population is 2.6 million<sup>12</sup> and as such this group is an  
14 important proportion of society who should be considered within public health policy.  
15 Understanding factors particularly affecting the exercise experience in these  
16 individuals is essential if higher physical activity levels are to be achieved.  
17 In a series of interviews with adolescents with Developmental Coordination Disorder  
18 (DCD)<sup>13,14</sup> and with children with cerebral palsy<sup>15</sup>, exercise-induced symptoms of  
19 muscle fatigue, poor physical tolerance and low energy levels have also been  
20 reported as major factors reducing enjoyment, tolerance and participation. However,  
21 as yet, the underpinning physiological limits have not been fully explored. We know  
22 that individual's judge and limit effort during exercise from symptoms arising from  
23 muscles, joints and the cardiovascular system; choosing to reduce how hard they are  
24 exercising when symptoms become too strong<sup>16,17</sup>. Children with increased motor  
25 impairment are known to perform poorly in sport and exercise fitness screening tests

1  
2  
3 1<sup>18 19</sup>, but the physiological and perceptual responses limiting exercise performance  
4  
5 2 have not been explored in these individuals<sup>18 20 21</sup>.  
6

### 7 **Aims**

8  
9  
10 4 The study set out to explore, in individuals with different levels of motor impairment,  
11  
12 5 physiological and perceptual measures during and limiting maximal exercise  
13  
14 6 performance.  
15

### 16 **Methods**

#### 17 *Procedure*

18  
19  
20 9 The study was approved by the University Research Ethics Committee (UREC).  
21  
22 10 Participants were recruited through two routes, either through a database of those who  
23  
24 11 had taken part in our previous research or through advertisements and posters.  
25  
26 12 Families indicating that they were interested in taking part were sent separate child  
27  
28 13 and parent information sheets and gave their written consent prior to the study.  
29  
30 14 Participants attended the Human Performance Laboratory for testing, with parents  
31  
32 15 attending only to help complete a health screening questionnaire for their child. The  
33  
34 16 testing session consisted of the participant completing the Movement ABC-2 Test  
35  
36 17 (MABC-2)<sup>22</sup> for a measure of motor impairment, followed by the exercise testing.  
37  
38 18 Details of these measures can be found below.  
39  
40 19 Participants were asked to refrain from eating, performing exercise or drinking  
41  
42 20 caffeine in the 2-hour period before attending the sessions.  
43  
44  
45  
46  
47

48

#### 49 *Participants*

50  
51  
52 23 Thirty five males aged 12 to 15 years with no known neurological condition were  
53  
54 24 recruited. Individuals were classified on the level of motor ability using the  
55  
56 25 Movement ABC-2 test.  
57  
58  
59  
60

1  
2  
3 1 *Measures*

4  
5 2 Movement ABC-2 Test (MABC-2)<sup>22</sup>.

6  
7 3 This standardised test of motor skill was used to confirm the presence of significant  
8  
9 4 movement difficulties. Eight age appropriate items were individually administered as  
10  
11 5 described in the test manual. Raw scores for each task were converted to standard  
12  
13 6 scores, summed across three sub-sections to obtain a standard score for Manual  
14  
15 7 Dexterity, Aiming & Catching and Balance. A total test score and percentile rank was  
16  
17 8 also obtained. For the diagnosis of motor impairment, it has been recommended that  
18  
19 9 scores below the 5<sup>th</sup> percentile indicate definite motor impairment while scores  
20  
21 10 between the 5<sup>th</sup> and 15<sup>th</sup> percentile indicate borderline scores<sup>23</sup>. Therefore, any child  
22  
23 11 scoring below the 15<sup>th</sup> percentile in this current study was classed as having high  
24  
25 12 motor impairment (HMI). Children scoring above the 15<sup>th</sup> percentile were classified  
26  
27 13 as having no motor impairment (NMI).  
28  
29  
30

31  
32 14 *Exercise testing*

33  
34 15 Height (Holtain stadiometer), weight (Seca scales) and body mass index (BMI) were  
35  
36 16 recorded prior to the exercise test. After resting for 6 minutes participants underwent  
37  
38 17 an incremental cycle ergometer exercise test (Lode Excalibur Sport, Gronigen,  
39  
40 18 Netherlands) of 1 minute stages after an initial 2 minutes of unloaded cycling.

41  
42 19 Workload was progressed based on the Godfrey protocol<sup>24</sup> (increasing workload by  
43  
44 20 15-20 Watts from unloaded cycling based on the height of the participant). The test  
45  
46 21 ended at volitional exhaustion or if the participant was unable to maintain a cadence  
47  
48 22 of 60 rpm, with verbal encouragement given throughout.

49  
50 23 Pulmonary gas exchange was measured breath-by-breath using an automated  
51  
52 24 metabolic analysis system (Cortex Metalyzer, Leipzig Germany). The system was  
53  
54 25 calibrated prior to each test in accordance with manufacturer's instructions. All  
55  
56  
57  
58  
59  
60

1 participants wore a face mask covering the nose and mouth connected to a low-  
2 resistance volume transducer (Triple V, Hoechberg, Germany). Heart rate was  
3 recorded continuously throughout the testing protocol using short-range telemetry  
4 (Polar S810, Finland). Oxygen uptake ( $\dot{V}O_2$ ) was calculated as the average  $\dot{V}O_2$  in the  
5 last 30s of each stage, whilst  $\dot{V}O_2$  peak was recorded as the highest 60s average before  
6 the termination of the test. The respiratory exchange ratio (RER) was calculated from  
7 the ratio of  $\dot{V}CO_2$  to  $\dot{V}O_2$  at each workload level throughout the exercise test.

8 Maximal fat oxidation was calculated using the equations of Frayn<sup>25</sup> in equation 1  
9 below:

$$10 \quad \text{Eq. 1 Fat oxidation (g.min)} = 1.67 \times \dot{V}O_2 - 1.67 \times \dot{V}CO_2$$

11 The relationship between the amount of oxygen utilised for a given work rate was  
12 calculated from the linear slope of the relationship between  $\dot{V}O_2$  and Watts ( $\dot{V}O_2/W$ )  
13 and was used as a measure of muscular efficiency. Oxygen pulse, a non-invasive  
14 indicator of cardiac function, was calculated by dividing the  $\dot{V}O_2$  by heart rate  
15 ( $\dot{V}O_2/HR$ ). Maximum workload ( $Workload_{max}$ ) was calculated as the final completed  
16 workload. Rating of perceived exertion (RPE) was measured at the end of each stage  
17 using the Cart and Load scale (CALER), which has previously been used to assess  
18 children's perception of effort during exercise<sup>26</sup>. The CALER has a scale from 1 to  
19 10 with 1 being classed as 'very easy' and 10 being 'so hard I'm going to stop'.  
20 Illustrations of a child pulling a cart behind their bicycle, which was progressively  
21 laden with bricks, accompanied the scale.  
22 The criteria for true maximal effort included a plateau in  $\dot{V}O_2$  max, maximal heart rate  
23  $\geq 95\%$  of age predicted maximum and RER  $>1.06$ <sup>27</sup>. All children were fully  
24 familiarised with the testing protocol prior to commencing the session.

1

2 MVIC Protocol

3 Participants performed a 1RM leg extensor strength test on a specially designed  
4 isometric strength-testing chair. The knee angle was 90<sup>0</sup> and the rotation axis of the  
5 strength chair was aligned with the knee axis. Participants were asked to relax for 30  
6 seconds, thereafter subjects performed maximum knee extension for approximately 5  
7 seconds. Verbal encouragement was given to reach the maximum force. After this  
8 maximum knee extension subjects relaxed for 30 seconds. This test was repeated three  
9 times, 1RM was the maximum output reached.

10 Electrical signals from the torque transducer were amplified (Digitimer Neurolog  
11 NL107 Recorder Amplifier) and digitised (Cambridge Electronic Design, micro1401).  
12 Torque from maximal voluntary contractions (MVIC) was recorded on a PC for  
13 subsequent analysis using Spike data analysis software (Spike 2 Version 5.0 for  
14 Windows).

### 15 **Data Analysis**

16 Descriptive statistics (mean +/- SD, range) were calculated for all variables.  
17 All exercise testing measure distributions were examined for normality. Linear  
18 regression analysis was performed to examine relationships between M-ABC score  
19 and the exercise variables. Ten participants reporting high motor impairment returned  
20 to the laboratory to repeat the exercise test to establish reliability data in this  
21 population. Test re-test reliability was analysed to test for systematic and random  
22 error using student t-test, intraclass correlation coefficient (ICC) [3,1], bias (average  
23 difference) and random error (1.96 x SD of differences). Statistical significance was  
24 accepted at p<0.05.

25

26



## Results

### *Movement ABC-2 Test*

Eighteen participants obtained total scores considered to be HMI, i.e. below the M-ABC 15<sup>th</sup> percentile, with 5 at or below the 5<sup>th</sup> percentile, and 17 classified as no motor impairment (NMI) (M-ABC > 15<sup>th</sup> percentile). Table 1 displays the participant characteristics from the test battery.

>>>>insert table 1 here

As expected, there was a significant difference in the Movement ABC percentile score between the HMI and NMI group (4.0 (4.7) v 62.8 (20.7),  $p < 0.05$ ).

### *Exercise Testing*

There was a significant difference in  $\dot{V}O_2$  peak (34.9 (6.3) v 48.5 (7.9) ml.kg.min<sup>-1</sup>),  $\dot{V}O_2$ /workload (12.5 (3.9) v 10.0 (1.3)  $\dot{V}O_2$ /W), oxygen pulse (12.1 (3.7) v 15.9 (4.0) ml.beat), maximum heart rate (176 (19.7) v 188 (8.8) beats.min) and MVIC (5.7 (1.0) v 9.0 (1.8) Nm.kg) with the NMI group achieving higher  $\dot{V}O_2$ , oxygen pulse, maximum heart rate and MVIC.

There was no difference between the groups in the respiratory exchange ratio (RER), with all but one participant demonstrating a maximal value greater than 1.0 at the end of the test. There was also no significant difference in maximal fat oxidation levels between the groups.

Compared to established maximal criteria for typically developing children<sup>28</sup> all but one of the participants met the criteria for a maximal effort during the exercise test, with no significant difference between the HMI and NMI groups. There was no

1  
2  
3 1 difference in the perception of effort throughout the exercise trial and at exercise  
4  
5 2 termination, with all participants reporting an RPE rating of 9 or 10 at the end of the  
6  
7 3 test, despite individuals in the HMI group having significantly lower maximum HR  
8  
9  
10 4 values at the end of the cycle ergometer test.  
11  
12 5

13  
14 6 There were significant relationships between the MABC score and  $\dot{V}O_2$  peak ( $r = 0.36$ ,  
15  
16 7  $p < 0.05$ ) (figure 1) and MVIC ( $r = 0.76$ ,  $p < 0.01$ ) (figure 2).  
17  
18  
19 8

20  
21 9  
22  
23 10 Figure 1. Relationship between M-ABC score and  $\dot{V}O_2$  peak.

24  
25 11 Table 2 below displays the characteristics of the participants who undertook the  
26  
27 12 MVIC testing

28  
29  
30  
31  
32 14 >>>>>>insert table 2 here  
33  
34  
35

36 16 Figure 2. Relationship between M-ABC score and MVIC.  
37  
38 17

### 39 18 *Test re-test reliability of exercise measures*

40  
41  
42 19 10 HMI participants returned to the laboratory to complete a second maximal exercise  
43  
44 20 test for the assessment of reliability in this population. The maximal exercise data  
45  
46 21 demonstrated good reliability with ICC scores for  $\dot{V}O_2$  peak 0.75 (CI 0.23-0.94; t 0.39,  
47  
48 22 bias 3.54, random error 6.93), maximal heart rate 0.93 (CI 0.73-0.98; t -0.86, bias 7.8,  
49  
50 23 random error 15.4) and maximal RER 0.89 (CI 0.59-0.98; t -0.14, bias 0.07, random  
51  
52 24 error 0.14). Maximal RPE ICC scores were all rated 9-10 thus affecting the ICC 0.05  
53  
54 25 (CI -0.60-0.66), but had a low bias (t -2.14, bias 0.86, random error 1.68).  
55  
56  
57  
58  
59  
60

## 1 Discussion

2 The study set out to explore, in individuals with different levels of motor impairment,  
3 physiological and perceptual factors during and limiting maximal exercise  
4 performance. Examination of the exercise test data showed a significant difference in  
5  $\dot{V}O_2$  peak,  $\dot{V}O_2$ / workload, oxygen pulse, maximum heart rate and MVIC between the  
6 HMI and NMI group. Interestingly there was no difference maximal rating of  
7 perceived exertion or RER. When considering limits to exercise in people with high  
8 motor impairment, the maximal RER and fat oxidation levels at test termination,  
9 suggest low levels of aerobic muscle performance and not a heightened perceived  
10 level of exertion, were limiting exercise performance. These findings are important as  
11 they highlight a low level of aerobic muscle performance as a major factor limiting  
12 exercise performance in children with poor coordination. Muscle plays a central role  
13 in health and disease across the lifespan<sup>29</sup> and, if left unaddressed in children with  
14 HMI, is likely to continue into adulthood and contribute to the development of  
15 metabolic disorders in this population.

16  
17 Despite children with HMI demonstrating a linear  $\dot{V}O_2$ / workload response, the value  
18 of 12.5 (3.9) ml.W reflects a reduced movement economy throughout the exercise<sup>30</sup>.  
19  $\dot{V}O_2$  normally rises at a rate of about 8.5-11 ml.min.watt and is independent of sex,  
20 age, body weight or height<sup>31</sup>. Thus, in children with HMI, exercise participation may  
21 be limited by the impaired ability of the muscle to work aerobically. The reduced  
22 muscular strength of the quadriceps reported in this study further supports the main  
23 limiting factor being at the muscular level and this finding supports the findings from  
24 previous studies citing a reduced strength in other muscle groups in children with  
25 greater motor impairment<sup>32</sup>.

1  
2  
3 1  
4  
5 2 In comparison to the NMI group, the HMI group had a reduced exercise capacity,  
6  
7 3 with a mean  $\dot{V}O_2$  peak of 34.9 ml.kg.min<sup>-1</sup>. The  $\dot{V}O_2$  peak was below the cardiovascular  
8  
9  
10 4 fitness threshold in the HMI children<sup>33</sup> and as such associated with an increased risk  
11  
12 5 of obesity, Type II diabetes and cardiovascular and metabolic disorders in adulthood  
13  
14 6<sup>34</sup>. Considered alongside the low maximum heart rates demonstrated by these  
15  
16 7 children (mean 176 beats.min<sup>-1</sup>) in comparison to NMI participants (188 beats.min<sup>-1</sup>)  
17  
18 8 and those reported in normal healthy children at the end of a similar cycling protocol  
19  
20 9<sup>35</sup>, our findings suggest that a low level of aerobic muscle performance was limiting  
21  
22 10 the ability of children with HMI to push themselves hard enough to maximally tax the  
23  
24 11 cardiovascular system. Despite a significantly lower oxygen pulse level between the  
25  
26 12 groups (12.1 (3.7) v 15.9 (4.0)ml.beat, p<0.05), the HMI group was not different to  
27  
28 13 those in healthy individuals reported previously<sup>36</sup>. This further supports the findings  
29  
30 14 that the limiting factor is of peripheral, and not central, origin. Given the emerging  
31  
32 15 role of mitochondrial dysfunction in many neuromuscular disorders, a lack of aerobic  
33  
34 16 capability in the muscles of children with poor motor control may impact on their  
35  
36 17 long-term health and may prevent them from increasing their heart rate to the level  
37  
38 18 required to achieve an aerobic training stimulus and attain fitness, health and  
39  
40 19 wellbeing benefits according to current guidelines for physical activity in children<sup>37</sup>.  
41  
42 20 Interestingly, despite the reduced aerobic fitness there was no difference in the  
43  
44 21 utilisation of fat as a substrate during the exercise protocol between the groups in this  
45  
46 22 study. The levels of fat oxidation in this current study were within the range  
47  
48 23 previously reported in healthy participants of similar age<sup>38</sup>. The number of  
49  
50 24 individuals in this sample is relatively small, however we included a range of  
51  
52 25 individuals with different motor capabilities and in the sub group of HMI participants  
53  
54  
55  
56  
57  
58  
59  
60

1  
2  
3 1 that returned to the laboratory we established good reliability in the clinical exercise  
4  
5 2 testing in this population.  
6

7 3 Muscle function has been found to have an important role in long term health<sup>29</sup> and  
8  
9 4 considering our observation of reduced muscle capacity in individuals with HMI, it is  
10  
11 5 important to investigate interventions that can be implemented in childhood to  
12  
13 6 improve muscle function and performance<sup>39</sup>. This is further supported with the  
14  
15 7 significantly lower MVIC in the HMI group in comparison to NMI. The reduced  
16  
17 8 strength of the major locomotor muscle group in the HMI not only has implications  
18  
19 9 for function, with some reports of increased co-contraction<sup>40</sup>, but also for the impact  
20  
21 10 on health and quality of life. In a recent study by Buchan et al.<sup>41</sup>, high intensity  
22  
23 11 exercise has been shown to reduce cardiovascular risk and improve muscle function in  
24  
25 12 healthy children. As yet, this type of intensity has not been investigated in the  
26  
27 13 population of children included in this current study, however the evidence of their  
28  
29 14 willingness to push themselves maximally in this study warrants the application of  
30  
31 15 such intensities of exercise to measure the impact on health and movement measures.  
32  
33 16 Work by Cairney et.al.<sup>18</sup> suggested that reduced exercise performance of children with  
34  
35 17 motor impairment was partly related to the level of perceived adequacy for the task.  
36  
37 18 The findings of this current work suggest that the limitations to exercise in the high  
38  
39 19 motor impairment group had strong physiological underpinnings reflected in the  
40  
41 20 criteria for a maximal effort being attained in all but one of the participants.  
42  
43  
44  
45  
46

47 21

48  
49 22 The findings from this work highlight the significant relationship between motor  
50  
51 23 impairment level and health status. The reduced exercise capacity and muscular  
52  
53 24 performance demonstrated by the participants with greater motor impairment  
54  
55 25 highlight the need for any exercise interventions to target the development of  
56  
57  
58  
59  
60

1  
2  
3 1 muscular function. Research has shown that exercise interventions play a possible  
4  
5 2 role in improving motor competence levels in children with movement difficulties <sup>42</sup>  
6  
7 3 however, how these changes relate to alterations in markers of cardiovascular and  
8  
9 4 muscular health and the long term involvement in physical activity have yet to be  
10  
11 5 elucidated.  
12  
13  
14 6

#### 7 **Data sharing**

8 No additional data available.

#### 9 **Contributorship statement**

10 Dr. Martyn Morris, Prof. Helen Dawes and Roel Janssen - Conception and design,  
11 acquisition of data or analysis and interpretation of data, and drafting the article or  
12 revising it critically for important intellectual content.

13 Dr Ken Howells - Conception and design and drafting the article or revising it critically  
14 for important intellectual content.

#### 15 **Competing Interests**

16 None

#### 17 **Funding**

18 None

19  
20  
21  
22  
23  
24  
25  
26  
27  
28  
29  
30  
31  
32  
33

## References

1. Powell KE, Dysinger W. Childhood participation in organized school sports and physical education as precursors of adult physical activity. *American Journal of Preventative Medicine* 1987;3(5):276-81.
2. Rejeski WJ, Miller ME, King AC, et al. Predictors of adherence to physical activity in the Lifestyle Interventions and Independence for Elders pilot study (LIFE-P). *Clin Interv Aging* 2007;2(3):485-94.
3. Poulsen AA, Ziviani JM, Cuskelly M. Leisure time physical activity energy expenditure in boys with developmental coordination disorder: The role of peer relations self-concept perceptions. *Otjr-Occupation Participation and Health* 2008;28(1):30-39.
4. Haga M. Physical fitness in children with high motor competence is different from that in children with low motor competence. *Phys Ther* 2009;89(10):1089-97.
5. Calley A, Williams S, Reid S, et al. A comparison of activity, participation and quality of life in children with and without spastic diplegia cerebral palsy. *Disabil Rehabil* 2012;34(15):1306-10.
6. Zimmet P, Alberti KG, Kaufman F, et al. The metabolic syndrome in children and adolescents - an IDF consensus report. *Pediatr Diabetes* 2007;8(5):299-306.
7. Wahi G, LeBlanc PJ, Hay JA, et al. Metabolic syndrome in children with and without developmental coordination disorder. *Research in Developmental Disabilities* 2011;32(6):2785-89.
8. Maffei C, Zaffanello M, Pellegrino M, et al. Nutrient oxidation during moderately intense exercise in obese prepubertal boys. *J Clin Endocrinol Metab* 2005;90(1):231-6.
9. Powell KE, Dysinger W. Childhood participation in organized school sports and physical education as precursors of adult physical activity. *American journal of preventive medicine* 1987;3(5):276-81.
10. Kirby A, Edwards L, Sugden D, et al. The development and standardization of the Adult Developmental Co-ordination Disorders/Dyspraxia Checklist (ADC). *Research in Developmental Disabilities* 2010;31(1):131-39.
11. Heymsfield SB, Thomas D, Bosy-Westphal A, et al. Evolving concepts on adjusting human resting energy expenditure measurements for body size. *Obes Rev*;13(11):1001-14.
12. ODI. Disability statistics and research, 2013.
13. Barnett A, Dawes H, Morris M, et al. Barriers and facilitators to participation in physical activity in teenagers with Developmental Coordination Disorder. *British Psychological Society, Developmental Section Annual Conference*. University of Nottingham & Nottingham Trent University, 2009.
14. Barnett A, Dawes H, Wilmot, K. Constraints and facilitators to participation in physical activity in teenagers with Developmental Co-ordination Disorder: an exploratory interview study. *Child: Care, Health and Development* 2012.
15. Buffart LM, Westendorp T, van den Berg-Emons RJ, et al. Perceived barriers to and facilitators of physical activity in young adults with childhood-onset physical disabilities. *J Rehabil Med* 2009;41(11):881-5.
16. Rejeski W. Not what, but how one feels: the measurement of affect during exercise. *Journal of Sport & Exercise Psychology* 1989;11:304-17.
17. Weiser PC, and Stamper, D.A. Psychophysiological interactions leading to increased effort, leg fatigue, and respiratory distress during prolonged strenuous bicycle riding. In: Borg G, editor. *Physical Work and Effort*. Oxford: Pergamon Press, 1977.
18. Cairney J, Hay JA, Wade TJ, et al. Developmental coordination disorder and aerobic fitness: Is it all in their heads or is measurement still the problem? *American Journal of Human Biology* 2006;18(1):66-70.
19. Schott N, Alof V, Hultsch D, et al. Physical fitness in children with developmental coordination disorder. *Research quarterly for exercise and sport* 2007;78(5):438-50.



- 1  
2  
3 1 20. Chia LC, Guelfi KJ, Licari MK. A comparison of the oxygen cost of locomotion in  
4 2 children with and without developmental coordination disorder. *Developmental*  
5 3 *medicine and child neurology* 2009;52(3):251-55.  
6 4 21. Wu SK, Lin HH, Li YC, et al. Cardiopulmonary fitness and endurance in children with  
7 5 developmental coordination disorder. *Research in developmental disabilities*  
8 6 2009;31(2):345-9.  
9 7 22. Henderson SE, Sugden DA, Barnett A. *Movement Assessment Battery for Children 2*  
10 8 *Checklist*. London: Pearson, 2007.  
11 9 23. Sugden D. *Developmental Coordination Disorder as a Specific Learning Difficulty*. Leeds  
12 10 *Consensus Statement*. Cardiff: The Dyscovery Trust, 2006.  
13 11 24. Godfrey S, Davies CT, Wozniak E, et al. Cardio-respiratory response to exercise in  
14 12 normal children. *Clinical science* 1971;40(5):419-31.  
15 13 25. Ziemann U, Ishii K, Borgheresi A, et al. Dissociation of the pathways mediating ipsilateral  
16 14 and contralateral motor-evoked potentials in human hand and arm muscles. *J Physiol*  
17 15 1999;518 ( Pt 3):895-906.  
18 16 26. Parfitt G, Shepherd P, Eston R. Reliability of effort production using the children's  
19 17 CALER and BABE perceived exertion scales. *Journal of Exercise Science and*  
20 18 *Fitness* 2007;5:49-55.  
21 19 27. Winter EM. *Sport and exercise physiology testing guidelines : the British Association of*  
22 20 *Sport and Exercise Sciences guide*. London: Routledge, 2007.  
23 21 28. Armstrong N, Welsman JR, Kirby BJ. Peak oxygen uptake and maturation in 12-yr olds.  
24 22 *Medicine and science in sports and exercise* 1998;30(1):165-9.  
25 23 29. Wolfe RR. The underappreciated role of muscle in health and disease. *Am J Clin Nutr*  
26 24 2006;84(3):475-82.  
27 25 30. Hansen JE, Casaburi R, Cooper DM, et al. Oxygen uptake as related to work rate  
28 26 increment during cycle ergometer exercise. *European journal of applied physiology*  
29 27 *and occupational physiology* 1988;57(2):140-5.  
30 28 31. Wasserman K, Sietsema, K, Sue, D.Y, et al. *Principles Of Exercise Testing &*  
31 29 *Interpretation: Including Pathophysiology And Clinical Applications*. 5th ed:  
32 30 Lippincott Williams and Wilkins., 2011.  
33 31 32. Schott N, Alof V, Hultsch D, et al. Physical fitness in children with developmental  
34 32 coordination disorder. *Research Quarterly for Exercise and Sport* 2007;78(5):438-50.  
35 33 33. Ruiz JR, Ortega FB, Rizzo NS, et al. High cardiovascular fitness is associated with low  
36 34 metabolic risk score in children: the European Youth Heart Study. *Pediatric research*  
37 35 2007;61(3):350-5.  
38 36 34. Anderssen SA, Cooper AR, Riddoch C, et al. Low cardiorespiratory fitness is a strong  
39 37 predictor for clustering of cardiovascular disease risk factors in children independent  
40 38 of country, age and sex. *Eur J Cardiovasc Prev Rehabil* 2007;14(4):526-31.  
41 39 35. Karila C, De Blic J, Waernessyckle S. Cardiopulmonary Exercise Testing in Children. An  
42 40 Individualized Protocol for Workload Increase. *Chest* 2001;120:81-87  
43 41 36. Buys R, Budts W, Reybrouck T, et al. Serial exercise testing in children, adolescents and  
44 42 young adults with Senning repair for transposition of the great arteries. *BMC*  
45 43 *Cardiovasc Disord* 2012;12:88.  
46 44 37. ACSM. *ACSM's Guidelines For Exercise Testing And Prescription*. *Guidelines for graded*  
47 45 *exercise testing and training*. 7  
48 46 ed. Philadelphia: Lea and Febiger: Lippincott Williams and Wilkins, 2005.  
49 47 38. Riddell MC, Jamnik VK, Iscoe KE, et al. Fat oxidation rate and the exercise intensity that  
50 48 elicits maximal fat oxidation decreases with pubertal status in young male subjects. *J*  
51 49 *Appl Physiol* 2008;105(2):742-8.  
52 50 39. Verschuren O, Ketelaar M, Takken T, et al. Exercise programs for children with cerebral  
53 51 palsy: a systematic review of the literature. *Am J Phys Med Rehabil* 2008;87(5):404-  
54 52 17.  
55 53 40. Raynor AJ. Strength, power, and coactivation in children with developmental  
56 54 coordination disorder. *Dev Med Child Neurol* 2001;43(10):676-84.



- 1  
2  
3 1 41. Buchan DS, Ollis S, Thomas NE, et al. Physical activity interventions: effects of duration  
4 2 and intensity. *Scandinavian Journal of Medicine & Science in Sports*  
5 3 2011;21(6):E341-E50.  
6 4 42. Hung WWY, Pang M. Y. C. Effects of group-based versus individual-based exercise  
7 5 training on motor performance in children with developmental coordination  
8 6 disorder: a randomized controlled pilot study. *Journal of Rehabilitation Medicine*  
9 7 2010;42:122-28.  
10 8  
11 9  
12  
13 10  
14 11  
15 12  
16 13  
17 14  
18 15  
19 16  
20 17  
21 18  
22 19  
23 20  
24 21  
25 22  
26 23  
27 24  
28 25  
29 26  
30 27  
31 28  
32 29  
33 30  
34 31  
35 32  
36 33  
37  
38  
39  
40  
41  
42  
43  
44  
45  
46  
47  
48  
49  
50  
51  
52  
53  
54  
55  
56  
57  
58  
59  
60

1  
2  
3 Table 1. Participant characteristics and outcome measures.  
4

|                                  | HMI (n=18)  | NMI (n=17)   |
|----------------------------------|-------------|--------------|
| M-ABC                            | 4.0 (4.7)   | 62.8 (20.7)* |
| Age (yrs)                        | 14.1 (1.5)  | 14.9 (0.9)   |
| Height (m)                       | 1.70 (0.10) | 1.74 (0.10)  |
| Weight (kg)                      | 62.8 (17.9) | 60.3 (10.6)  |
| BMI                              | 21.5 (4.0)  | 19.5 (2.1)   |
| VO <sub>2</sub> max (ml.kg.min)  | 34.9 (6.3)  | 48.5 (7.9)*  |
| VO <sub>2</sub> /Workload (ml.W) | 12.5 (3.9)  | 10.0 (1.3)*  |
| O <sub>2</sub> Pulse (ml.beat)   | 12.1 (3.7)  | 15.9 (4.0)*  |
| Heart Rate max. (beats.min)      | 176 (19.7)  | 188 (8.8)*   |
| RER max.                         | 1.15 (0.09) | 1.18 (0.09)  |
| RPE max.                         | 9.1 (1.5)   | 9.6 (0.5)    |

5 Table 2. M-ABC and MVIC for the HMI and NMI participants.  
6

|              | HMI (n=10) | NMI (n=10)   |
|--------------|------------|--------------|
| M-ABC        | 4.3 (5.4)  | 68.6 (19.9)* |
| MVIC (Nm.kg) | 5.7 (1.0)  | 9.0 (1.8)*   |

1  
2  
3 1 **Motor Impairment and its relationship to fitness in children**  
4  
5 2  
6  
7 3 Martyn Morris  
8  
9 4 Helen Dawes  
10  
11 5 Ken Howells  
12  
13 6 Roel Janssen  
14  
15  
16 7 **Corresponding author**  
17  
18 8 Dr. Martyn Morris  
19  
20 9 Department of Sport and Health Sciences  
21  
22 10 Oxford Brookes University  
23  
24 11 Headington Campus  
25  
26 12 Gipsy Lane  
27  
28 13 Oxford OX3 0BP  
29  
30 14 U.K.  
31  
32 15 mgmorris@brookes.ac.uk  
33  
34  
35  
36  
37  
38 17 **Key words:** Motor impairment,  $\dot{V}O_2$  max, fitness, muscle  
39  
40 18 **Word count: 2621**  
41  
42  
43  
44  
45  
46  
47  
48  
49  
50  
51  
52  
53  
54  
55  
56  
57  
58  
59  
60

1  
2  
3 **Abstract**

4 **Background:** Children with movement impairments are known to perform poorly in  
5  
6  
7  
8  
9  
10  
11  
12  
13  
14  
15  
16  
17  
18  
19  
20  
21  
22  
23  
24  
25  
26  
27  
28  
29  
30  
31  
32  
33  
34  
35  
36  
37  
38  
39  
40  
41  
42  
43  
44  
45  
46  
47  
48  
49  
50  
51  
52  
53  
54  
55  
56  
57  
58  
59  
60

3 exercise tests but the nature of the limiting factor is often unknown.

4 **Aim:** The aim of this work was to explore physiological and perceptual limits to  
5  
6  
7  
8  
9  
10  
11  
12  
13  
14  
15  
16  
17  
18  
19  
20  
21  
22  
23  
24  
25  
26  
27  
28  
29  
30  
31  
32  
33  
34  
35  
36  
37  
38  
39  
40  
41  
42  
43  
44  
45  
46  
47  
48  
49  
50  
51  
52  
53  
54  
55  
56  
57  
58  
59  
60

5 exercise in children with varying degrees of motor impairment, and the relationships  
6  
7  
8  
9  
10  
11  
12  
13  
14  
15  
16  
17  
18  
19  
20  
21  
22  
23  
24  
25  
26  
27  
28  
29  
30  
31  
32  
33  
34  
35  
36  
37  
38  
39  
40  
41  
42  
43  
44  
45  
46  
47  
48  
49  
50  
51  
52  
53  
54  
55  
56  
57  
58  
59  
60

6 to measures of health.

7 **Methods:** 35 boys aged 12-15yrs completed the Movement ABC test for the  
8  
9  
10  
11  
12  
13  
14  
15  
16  
17  
18  
19  
20  
21  
22  
23  
24  
25  
26  
27  
28  
29  
30  
31  
32  
33  
34  
35  
36  
37  
38  
39  
40  
41  
42  
43  
44  
45  
46  
47  
48  
49  
50  
51  
52  
53  
54  
55  
56  
57  
58  
59  
60

8 assessment of motor impairment, followed by an incremental cycle ergometer test to  
9  
10  
11  
12  
13  
14  
15  
16  
17  
18  
19  
20  
21  
22  
23  
24  
25  
26  
27  
28  
29  
30  
31  
32  
33  
34  
35  
36  
37  
38  
39  
40  
41  
42  
43  
44  
45  
46  
47  
48  
49  
50  
51  
52  
53  
54  
55  
56  
57  
58  
59  
60

9 exhaustion for the assessment of maximal oxygen uptake ( $\dot{V}O_{2peak}$ ), respiratory  
10  
11  
12  
13  
14  
15  
16  
17  
18  
19  
20  
21  
22  
23  
24  
25  
26  
27  
28  
29  
30  
31  
32  
33  
34  
35  
36  
37  
38  
39  
40  
41  
42  
43  
44  
45  
46  
47  
48  
49  
50  
51  
52  
53  
54  
55  
56  
57  
58  
59  
60

10 exchange ratio (RER), heart rate (HR) and rating of perceived exertion (RPE).

11 10 participants classified as having either high or no motor impairment also  
12  
13  
14  
15  
16  
17  
18  
19  
20  
21  
22  
23  
24  
25  
26  
27  
28  
29  
30  
31  
32  
33  
34  
35  
36  
37  
38  
39  
40  
41  
42  
43  
44  
45  
46  
47  
48  
49  
50  
51  
52  
53  
54  
55  
56  
57  
58  
59  
60

12 performed a maximal voluntary isometric contraction (MVIC) for the assessment of  
13  
14  
15  
16  
17  
18  
19  
20  
21  
22  
23  
24  
25  
26  
27  
28  
29  
30  
31  
32  
33  
34  
35  
36  
37  
38  
39  
40  
41  
42  
43  
44  
45  
46  
47  
48  
49  
50  
51  
52  
53  
54  
55  
56  
57  
58  
59  
60

13 lower limb extensor strength.

14 **Results:** 18 boys were classified as having high motor impairment. All but one  
15  
16  
17  
18  
19  
20  
21  
22  
23  
24  
25  
26  
27  
28  
29  
30  
31  
32  
33  
34  
35  
36  
37  
38  
39  
40  
41  
42  
43  
44  
45  
46  
47  
48  
49  
50  
51  
52  
53  
54  
55  
56  
57  
58  
59  
60

15 participant met the criteria for maximum effort, both perceptually and physiologically,  
16  
17  
18  
19  
20  
21  
22  
23  
24  
25  
26  
27  
28  
29  
30  
31  
32  
33  
34  
35  
36  
37  
38  
39  
40  
41  
42  
43  
44  
45  
46  
47  
48  
49  
50  
51  
52  
53  
54  
55  
56  
57  
58  
59  
60

16 in the exercise test. There was a significant difference in  $\dot{V}O_2$  peak (34.9 v 48.5  
17  
18  
19  
20  
21  
22  
23  
24  
25  
26  
27  
28  
29  
30  
31  
32  
33  
34  
35  
36  
37  
38  
39  
40  
41  
42  
43  
44  
45  
46  
47  
48  
49  
50  
51  
52  
53  
54  
55  
56  
57  
58  
59  
60

17 ml.kg.min<sup>-1</sup>),  $\dot{V}O_2$  workload (12.5 v 10.0ml.W), maximal heart rate (176 v 188  
18  
19  
20  
21  
22  
23  
24  
25  
26  
27  
28  
29  
30  
31  
32  
33  
34  
35  
36  
37  
38  
39  
40  
41  
42  
43  
44  
45  
46  
47  
48  
49  
50  
51  
52  
53  
54  
55  
56  
57  
58  
59  
60

18 beats.min<sup>-1</sup>), maximal oxygen pulse (12.1 v 15.9 ml.beat) and MVIC (5.7 v 9.1  
19  
20  
21  
22  
23  
24  
25  
26  
27  
28  
29  
30  
31  
32  
33  
34  
35  
36  
37  
38  
39  
40  
41  
42  
43  
44  
45  
46  
47  
48  
49  
50  
51  
52  
53  
54  
55  
56  
57  
58  
59  
60

19 Nm.kg) between the high and non motor impaired participants respectively. There  
20  
21  
22  
23  
24  
25  
26  
27  
28  
29  
30  
31  
32  
33  
34  
35  
36  
37  
38  
39  
40  
41  
42  
43  
44  
45  
46  
47  
48  
49  
50  
51  
52  
53  
54  
55  
56  
57  
58  
59  
60

20 was no significant difference in the RER or RPE between the groups.

21 **Conclusion:** When performing cycling ergometry, perceived exertion was not a  
22  
23  
24  
25  
26  
27  
28  
29  
30  
31  
32  
33  
34  
35  
36  
37  
38  
39  
40  
41  
42  
43  
44  
45  
46  
47  
48  
49  
50  
51  
52  
53  
54  
55  
56  
57  
58  
59  
60

22 limiting factor in children with high motor impairment. The lower heart rate at  
23  
24  
25  
26  
27  
28  
29  
30  
31  
32  
33  
34  
35  
36  
37  
38  
39  
40  
41  
42  
43  
44  
45  
46  
47  
48  
49  
50  
51  
52  
53  
54  
55  
56  
57  
58  
59  
60

23 exercise cessation, coupled with reduced movement efficiency and lower muscle  
24  
25  
26  
27  
28  
29  
30  
31  
32  
33  
34  
35  
36  
37  
38  
39  
40  
41  
42  
43  
44  
45  
46  
47  
48  
49  
50  
51  
52  
53  
54  
55  
56  
57  
58  
59  
60

24 strength reported in this group, would suggest exercise is limited by impairment at the  
25  
26  
27  
28  
29  
30  
31  
32  
33  
34  
35  
36  
37  
38  
39  
40  
41  
42  
43  
44  
45  
46  
47  
48  
49  
50  
51  
52  
53  
54  
55  
56  
57  
58  
59  
60

25 muscular level. This finding was supported by the high RER values despite low

1  
2  
3 1 maximal heart rate values attained during the exercise test and reduced maximal  
4  
5 2 strength. Perception of effort is not heightened in children with high motor  
6  
7 3 impairment and future exercise interventions should be focused on improving  
8  
9  
10 4 muscular condition in participants with high motor impairment to enable them to be  
11  
12 5 better prepared to engage in physical activity for health.  
13  
14  
15  
16  
17  
18  
19  
20  
21  
22  
23  
24  
25  
26  
27  
28  
29  
30  
31  
32  
33  
34  
35  
36  
37  
38  
39  
40  
41  
42  
43  
44  
45  
46  
47  
48  
49  
50  
51  
52  
53  
54  
55  
56  
57  
58  
59  
60

## 1 Introduction

2 Physical activity levels in childhood have been shown to predict adult activity  
3 behavior<sup>1,2</sup>, affecting life expectancy and quality of life years. As such, successfully  
4 achieving an active lifestyle in childhood is critical. Children with movement  
5 difficulties and poor coordination tend to have lower levels of physical activity  
6 participation than their typically developing peers<sup>3-5</sup>. Further, this group of children,  
7 with reduced motor coordination and low activity levels, have been found to have  
8 significantly higher metabolic syndrome indicators<sup>6</sup>, including: abdominal adiposity,  
9 blood pressure and triglyceride levels compared to their typically developing peers<sup>7</sup>  
10<sup>8</sup>. Of added concern is that such motor impairments are known to persist into  
11 adulthood, further impacting on the ability of these individuals to achieve a physically  
12 active lifestyle as adults<sup>9-11</sup>. The number of people with some form of motor  
13 impairment in the UK population is 2.6 million<sup>12</sup> and as such this group is an  
14 important proportion of society who should be considered within public health policy.  
15 Understanding factors particularly affecting the exercise experience in these  
16 individuals is essential if higher physical activity levels are to be achieved.  
17 In a series of interviews with adolescents with Developmental Coordination Disorder  
18 (DCD)<sup>13,14</sup> and with children with cerebral palsy<sup>15</sup>, exercise-induced symptoms of  
19 muscle fatigue, poor physical tolerance and low energy levels have also been  
20 reported as major factors reducing enjoyment, tolerance and participation. However,  
21 as yet, the underpinning physiological limits have not been fully explored. We know  
22 that individual's judge and limit effort during exercise from symptoms arising from  
23 muscles, joints and the cardiovascular system; choosing to reduce how hard they are  
24 exercising when symptoms become too strong<sup>16,17</sup>. Children with increased motor  
25 impairment are known to perform poorly in sport and exercise fitness screening tests

1 18<sup>19</sup>, but the physiological and perceptual responses limiting exercise performance  
2  
3  
4  
5 have not been explored in these individuals<sup>18 20 21</sup>.

### 3 **Aims**

4 The study set out to explore, in individuals with different levels of motor impairment,  
5 physiological and perceptual measures during and limiting maximal exercise  
6 performance.

### 7 **Methods**

#### 8 *Procedure*

9 The study was approved by the University Research Ethics Committee (UREC).

10 Participants were recruited through two routes, either through a database of those who  
11 had taken part in our previous research or through advertisements and posters.

12 Families indicating that they were interested in taking part were sent separate child  
13 and parent information sheets and gave their written consent prior to the study.

14 Participants attended the Human Performance Laboratory for testing, with parents  
15 attending only to help complete a health screening questionnaire for their child. The  
16 testing session consisted of the participant completing the Movement ABC-2 Test  
17 (MABC-2)<sup>22</sup> for a measure of motor impairment, followed by the exercise testing.

18 Details of these measures can be found below.

19 Participants were asked to refrain from eating, performing exercise or drinking  
20 caffeine in the 2-hour period before attending the sessions.

21

#### 22 *Participants*

23 Thirty five males aged 12 to 15 years with no known neurological condition were  
24 recruited. Individuals were classified on the level of motor ability using the  
25 Movement ABC-2 test.

1  
2  
3 1 *Measures*

4  
5 2 Movement ABC-2 Test (MABC-2)<sup>22</sup>.

6  
7 3 This standardised test of motor skill was used to confirm the presence of significant  
8  
9 4 movement difficulties. Eight age appropriate items were individually administered as  
10  
11 5 described in the test manual. Raw scores for each task were converted to standard  
12  
13 6 scores, summed across three sub-sections to obtain a standard score for Manual  
14  
15 7 Dexterity, Aiming & Catching and Balance. A total test score and percentile rank was  
16  
17 8 also obtained. For the diagnosis of motor impairment, it has been recommended that  
18  
19 9 scores below the 5<sup>th</sup> percentile indicate definite motor impairment while scores  
20  
21 10 between the 5<sup>th</sup> and 15<sup>th</sup> percentile indicate borderline scores<sup>23</sup>. Therefore, any child  
22  
23 11 scoring below the 15<sup>th</sup> percentile in this current study was classed as having high  
24  
25 12 motor impairment (HMI). Children scoring above the 15<sup>th</sup> percentile were classified  
26  
27 13 as having no motor impairment (NMI).

28  
29  
30  
31  
32 14 *Exercise testing*

33  
34 15 Height (Holtain stadiometer), weight (Seca scales) and body mass index (BMI) were  
35  
36 16 recorded prior to the exercise test. After resting for 6 minutes participants underwent  
37  
38 17 an incremental cycle ergometer exercise test (Lode Excalibur Sport, Gronigen,  
39  
40 18 Netherlands) of 1 minute stages after an initial 2 minutes of unloaded cycling.

41  
42 19 Workload was progressed based on the Godfrey protocol<sup>24</sup> (increasing workload by  
43  
44 20 15-20 Watts from unloaded cycling based on the height of the participant). The test  
45  
46 21 ended at volitional exhaustion or if the participant was unable to maintain a cadence  
47  
48 22 of 60 rpm, with verbal encouragement given throughout.

49  
50 23 Pulmonary gas exchange was measured breath-by-breath using an automated  
51  
52 24 metabolic analysis system (Cortex Metalyzer, Leipzig Germany). The system was  
53  
54 25 calibrated prior to each test in accordance with manufacturer's instructions. All  
55  
56  
57  
58  
59  
60



1 participants wore a face mask covering the nose and mouth connected to a low-  
2 resistance volume transducer (Triple V, Hoechberg, Germany). Heart rate was  
3 recorded continuously throughout the testing protocol using short-range telemetry  
4 (Polar S810, Finland). Oxygen uptake ( $\dot{V}O_2$ ) was calculated as the average  $\dot{V}O_2$  in the  
5 last 30s of each stage, whilst  $\dot{V}O_2$  peak was recorded as the highest 60s average before  
6 the termination of the test. The respiratory exchange ratio (RER) was calculated from  
7 the ratio of  $\dot{V}CO_2$  to  $\dot{V}O_2$  at each workload level throughout the exercise test.

8 Maximal fat oxidation was calculated using the equations of Frayn<sup>25</sup> in equation 1  
9 below:

$$10 \quad \text{Eq. 1 Fat oxidation (g.min)} = 1.67 \times \dot{V}O_2 - 1.67 \times \dot{V}CO_2$$

11 The relationship between the amount of oxygen utilised for a given work rate was  
12 calculated from the linear slope of the relationship between  $\dot{V}O_2$  and Watts ( $\dot{V}O_2/W$ )  
13 and was used as a measure of muscular efficiency. Oxygen pulse, a non-invasive  
14 indicator of cardiac function, was calculated by dividing the  $\dot{V}O_2$  by heart rate  
15 ( $\dot{V}O_2/HR$ ). Maximum workload ( $Workload_{max}$ ) was calculated as the final completed  
16 workload. Rating of perceived exertion (RPE) was measured at the end of each stage  
17 using the Cart and Load scale (CALER), which has previously been used to assess  
18 children's perception of effort during exercise<sup>26</sup>. The CALER has a scale from 1 to  
19 10 with 1 being classed as 'very easy' and 10 being 'so hard I'm going to stop'.  
20 Illustrations of a child pulling a cart behind their bicycle, which was progressively  
21 laden with bricks, accompanied the scale.

22 The criteria for true maximal effort included a plateau in  $\dot{V}O_2$  max, maximal heart rate  
23  $\geq 95\%$  of age predicted maximum and RER  $>1.06$ <sup>27</sup>. All children were fully  
24 familiarised with the testing protocol prior to commencing the session.

1

2 MVIC Protocol

3 Participants performed a 1RM leg extensor strength test on a specially designed  
4 isometric strength-testing chair. The knee angle was 90<sup>0</sup> and the rotation axis of the  
5 strength chair was aligned with the knee axis. Participants were asked to relax for 30  
6 seconds, thereafter subjects performed maximum knee extension for approximately 5  
7 seconds. Verbal encouragement was given to reach the maximum force. After this  
8 maximum knee extension subjects relaxed for 30 seconds. This test was repeated three  
9 times, 1RM was the maximum output reached.

10 Electrical signals from the torque transducer were amplified (Digitimer Neurolog  
11 NL107 Recorder Amplifier) and digitised (Cambridge Electronic Design, micro1401).  
12 Torque from maximal voluntary contractions (MVIC) was recorded on a PC for  
13 subsequent analysis using Spike data analysis software (Spike 2 Version 5.0 for  
14 Windows).

### 15 **Data Analysis**

16 Descriptive statistics (mean +/- SD, range) were calculated for all variables.  
17 All exercise testing measure distributions were examined for normality. Linear  
18 regression analysis was performed to examine relationships between M-ABC score  
19 and the exercise variables. Ten participants reporting high motor impairment returned  
20 to the laboratory to repeat the exercise test to establish reliability data in this  
21 population. Test re-test reliability was analysed to test for systematic and random  
22 error using student t-test, intraclass correlation coefficient (ICC) [3,1], bias (average  
23 difference) and random error (1.96 x SD of differences). Statistical significance was  
24 accepted at p<0.05.

25

26

## Results

### *Movement ABC-2 Test*

Eighteen participants obtained total scores considered to be HMI, i.e. below the M-ABC 15<sup>th</sup> percentile, with 5 at or below the 5<sup>th</sup> percentile, and 17 classified as no motor impairment (NMI) (M-ABC > 15<sup>th</sup> percentile). Table 1 displays the participant characteristics from the test battery.

>>>>insert table 1 here

As expected, there was a significant difference in the Movement ABC percentile score between the HMI and NMI group (4.0 (4.7) v 62.8 (20.7),  $p < 0.05$ ).

### *Exercise Testing*

There was a significant difference in  $\dot{V}O_2$  peak (34.9 (6.3) v 48.5 (7.9) ml.kg.min<sup>-1</sup>),  $\dot{V}O_2$ /workload (12.5 (3.9) v 10.0 (1.3)  $\dot{V}O_2$ /W), oxygen pulse (12.1 (3.7) v 15.9 (4.0) ml.beat), maximum heart rate (176 (19.7) v 188 (8.8) beats.min) and MVIC (5.7 (1.0) v 9.0 (1.8) Nm.kg) with the NMI group achieving higher  $\dot{V}O_2$ , oxygen pulse, maximum heart rate and MVIC.

There was no difference between the groups in the respiratory exchange ratio (RER), with all but one participant demonstrating a maximal value greater than 1.0 at the end of the test. There was also no significant difference in maximal fat oxidation levels between the groups.

Compared to established maximal criteria for typically developing children<sup>28</sup> all but one of the participants met the criteria for a maximal effort during the exercise test, with no significant difference between the HMI and NMI groups. There was no

1  
2  
3 1 difference in the perception of effort throughout the exercise trial and at exercise  
4  
5 2 termination, with all participants reporting an RPE rating of 9 or 10 at the end of the  
6  
7 3 test, despite individuals in the HMI group having significantly lower maximum HR  
8  
9  
10 4 values at the end of the cycle ergometer test.  
11  
12 5

13  
14 6 There were significant relationships between the MABC score and  $\dot{V}O_2$  peak ( $r = 0.36$ ,  
15  
16 7  $p < 0.05$ ) (figure 1) and MVIC ( $r = 0.76$ ,  $p < 0.01$ ) (figure 2).  
17  
18 8

19  
20  
21 9  
22  
23 10 Figure 1. Relationship between M-ABC score and  $\dot{V}O_2$  peak.

24  
25 11 Table 2 below displays the characteristics of the participants who undertook the  
26  
27 12 MVIC testing

28  
29  
30  
31  
32 14 >>>>>>insert table 2 here  
33  
34 15

35  
36 16 Figure 2. Relationship between M-ABC score and MVIC.  
37  
38 17

### 39 18 *Test re-test reliability of exercise measures*

40  
41  
42 19 10 HMI participants returned to the laboratory to complete a second maximal exercise  
43  
44 20 test for the assessment of reliability in this population. The maximal exercise data  
45  
46 21 demonstrated good reliability with ICC scores for  $\dot{V}O_2$  peak 0.75 (CI 0.23-0.94;  $t$  0.39,  
47  
48 22 bias 3.54, random error 6.93), maximal heart rate 0.93 (CI 0.73-0.98;  $t$  -0.86, bias 7.8,  
49  
50 23 random error 15.4) and maximal RER 0.89 (CI 0.59-0.98;  $t$  -0.14, bias 0.07, random  
51  
52 24 error 0.14). Maximal RPE ICC scores were all rated 9-10 thus affecting the ICC 0.05  
53  
54 25 (CI -0.60-0.66), but had a low bias ( $t$  -2.14, bias 0.86, random error 1.68).  
55  
56  
57  
58 26

## 1 Discussion

2 The study set out to explore, in individuals with different levels of motor impairment,  
3 physiological and perceptual factors during and limiting maximal exercise  
4 performance. Examination of the exercise test data showed a significant difference in  
5  $\dot{V}O_2$  peak,  $\dot{V}O_2$ / workload, oxygen pulse, maximum heart rate and MVIC between the  
6 HMI and NMI group. Interestingly there was no difference maximal rating of  
7 perceived exertion or RER. When considering limits to exercise in people with high  
8 motor impairment, the maximal RER and fat oxidation levels at test termination,  
9 suggest low levels of aerobic muscle performance and not a heightened perceived  
10 level of exertion, were limiting exercise performance. These findings are important as  
11 they highlight a low level of aerobic muscle performance as a major factor limiting  
12 exercise performance in children with poor coordination. Muscle plays a central role  
13 in health and disease across the lifespan<sup>29</sup> and, if left unaddressed in children with  
14 HMI, is likely to continue into adulthood and contribute to the development of  
15 metabolic disorders in this population.

16  
17 Despite children with HMI demonstrating a linear  $\dot{V}O_2$ / workload response, the value  
18 of 12.5 (3.9) ml.W reflects a reduced movement economy throughout the exercise<sup>30</sup>.  
19  $\dot{V}O_2$  normally rises at a rate of about 8.5-11 ml.min.watt and is independent of sex,  
20 age, body weight or height<sup>31</sup>. Thus, in children with HMI, exercise participation may  
21 be limited by the impaired ability of the muscle to work aerobically. The reduced  
22 muscular strength of the quadriceps reported in this study further supports the main  
23 limiting factor being at the muscular level and this finding supports the findings from  
24 previous studies citing a reduced strength in other muscle groups in children with  
25 greater motor impairment<sup>32</sup>.

1  
2  
3 1  
4  
5 2 In comparison to the NMI group, the HMI group had a reduced exercise capacity,  
6  
7 3 with a mean  $\dot{V}O_2$  peak of 34.9 ml.kg.min<sup>-1</sup>. The  $\dot{V}O_2$  peak was below the cardiovascular  
8  
9  
10 4 fitness threshold in the HMI children<sup>33</sup> and as such associated with an increased risk  
11  
12 5 of obesity, Type II diabetes and cardiovascular and metabolic disorders in adulthood  
13  
14 6<sup>34</sup>. Considered alongside the low maximum heart rates demonstrated by these  
15  
16 7 children (mean 176 beats.min<sup>-1</sup>) in comparison to NMI participants (188 beats.min<sup>-1</sup>)  
17  
18 8 and those reported in normal healthy children at the end of a similar cycling protocol  
19  
20 9<sup>35</sup>, our findings suggest that a low level of aerobic muscle performance was limiting  
21  
22 10 the ability of children with HMI to push themselves hard enough to maximally tax the  
23  
24 11 cardiovascular system. Despite a significantly lower oxygen pulse level between the  
25  
26 12 groups (12.1 (3.7) v 15.9 (4.0)ml.beat, p<0.05), the HMI group was not different to  
27  
28 13 those in healthy individuals reported previously<sup>36</sup>. This further supports the findings  
29  
30 14 that the limiting factor is of peripheral, and not central, origin. Given the emerging  
31  
32 15 role of mitochondrial dysfunction in many neuromuscular disorders, a lack of aerobic  
33  
34 16 capability in the muscles of children with poor motor control may impact on their  
35  
36 17 long-term health and may prevent them from increasing their heart rate to the level  
37  
38 18 required to achieve an aerobic training stimulus and attain fitness, health and  
39  
40 19 wellbeing benefits according to current guidelines for physical activity in children<sup>37</sup>.  
41  
42 20 Interestingly, despite the reduced aerobic fitness there was no difference in the  
43  
44 21 utilisation of fat as a substrate during the exercise protocol between the groups in this  
45  
46 22 study. The levels of fat oxidation in this current study were within the range  
47  
48 23 previously reported in healthy participants of similar age<sup>38</sup>. The number of  
49  
50 24 individuals in this sample is relatively small, however we included a range of  
51  
52 25 individuals with different motor capabilities and in the sub group of HMI participants  
53  
54  
55  
56  
57  
58  
59  
60

1  
2  
3 1 that returned to the laboratory we established good reliability in the clinical exercise  
4  
5 2 testing in this population.  
6

7 3 Muscle function has been found to have an important role in long term health <sup>29</sup> and  
8  
9 4 considering our observation of reduced muscle capacity in individuals with HMI, it is  
10  
11 5 important to investigate interventions that can be implemented in childhood to  
12  
13 6 improve muscle function and performance <sup>39</sup>. This is further supported with the  
14  
15 7 significantly lower MVIC in the HMI group in comparison to NMI. The reduced  
16  
17 8 strength of the major locomotor muscle group in the HMI not only has implications  
18  
19 9 for function, with some reports of increased co-contraction <sup>40</sup>, but also for the impact  
20  
21 10 on health and quality of life. In a recent study by Buchan et al. <sup>41</sup>, high intensity  
22  
23 11 exercise has been shown to reduce cardiovascular risk and improve muscle function in  
24  
25 12 healthy children. As yet, this type of intensity has not been investigated in the  
26  
27 13 population of children included in this current study, however the evidence of their  
28  
29 14 willingness to push themselves maximally in this study warrants the application of  
30  
31 15 such intensities of exercise to measure the impact on health and movement measures.  
32  
33 16 Work by Cairney et.al. <sup>18</sup> suggested that reduced exercise performance of children with  
34  
35 17 motor impairment was partly related to the level of perceived adequacy for the task.  
36  
37 18 The findings of this current work suggest that the limitations to exercise in the high  
38  
39 19 motor impairment group had strong physiological underpinnings reflected in the  
40  
41 20 criteria for a maximal effort being attained in all but one of the participants.  
42  
43  
44  
45  
46  
47

48  
49 21  
50 22 The findings from this work highlight the significant relationship between motor  
51  
52 23 impairment level and health status. The reduced exercise capacity and muscular  
53  
54 24 performance demonstrated by the participants with greater motor impairment  
55  
56 25 highlight the need for any exercise interventions to target the development of  
57  
58  
59  
60

1  
2  
3 1 muscular function. Research has shown that exercise interventions play a possible  
4  
5 2 role in improving motor competence levels in children with movement difficulties <sup>42</sup>  
6  
7 3 however, how these changes relate to alterations in markers of cardiovascular and  
8  
9 4 muscular health and the long term involvement in physical activity have yet to be  
10  
11 5 elucidated.  
12  
13  
14  
15  
16  
17  
18  
19  
20  
21  
22  
23  
24  
25  
26  
27  
28  
29  
30

### 13 Contributorship statement

31  
32 14 Dr. Martyn Morris, Prof. Helen Dawes and Roel Janssen - Conception and design,  
33  
34 15 acquisition of data or analysis and interpretation of data, and drafting the article or  
35  
36 16 revising it critically for important intellectual content.

37  
38 17 Dr Ken Howells - Conception and design and drafting the article or revising it critically  
39  
40 18 for important intellectual content.  
41  
42  
43  
44  
45  
46  
47

### 23 References

- 48  
49 25 1. Powell KE, Dysinger W. Childhood participation in organized school sports and physical  
50 26 education as precursors of adult physical activity. *American Journal of Preventative*  
51 27 *Medicine* 1987;3(5):276-81.  
52 28 2. Rejeski WJ, Miller ME, King AC, Studenski SA, Katula JA, Fielding RA, et al. Predictors  
53 29 of adherence to physical activity in the Lifestyle Interventions and Independence for  
54 30 Elders pilot study (LIFE-P). *Clin Interv Aging* 2007;2(3):485-94.  
55 31 3. Poulsen AA, Ziviani JM, Cuskelly M. Leisure time physical activity energy expenditure in  
56 32 boys with developmental coordination disorder: The role of peer relations self-  
57 33 concept perceptions. *Otjr-Occupation Participation and Health* 2008;28(1):30-39.  
58  
59  
60



- 1 4. Haga M. Physical fitness in children with high motor competence is different from that in  
2 children with low motor competence. *Phys Ther* 2009;89(10):1089-97.
- 3 5. Calley A, Williams S, Reid S, Blair E, Valentine J, Girdler S, et al. A comparison of  
4 activity, participation and quality of life in children with and without spastic diplegia  
5 cerebral palsy. *Disabil Rehabil* 2012;34(15):1306-10.
- 6 6. Zimmet P, Alberti KG, Kaufman F, Tajima N, Silink M, Arslanian S, et al. The metabolic  
7 syndrome in children and adolescents - an IDF consensus report. *Pediatr Diabetes*  
8 2007;8(5):299-306.
- 9 7. Wahi G, LeBlanc PJ, Hay JA, Faught BE, O'Leary D, Cairney J. Metabolic syndrome in  
10 children with and without developmental coordination disorder. *Research in*  
11 *Developmental Disabilities* 2011;32(6):2785-89.
- 12 8. Maffei C, Zaffanello M, Pellegrino M, Banzato C, Bogoni G, Viviani E, et al. Nutrient  
13 oxidation during moderately intense exercise in obese prepubertal boys. *J Clin*  
14 *Endocrinol Metab* 2005;90(1):231-6.
- 15 9. Powell KE, Dysinger W. Childhood participation in organized school sports and physical  
16 education as precursors of adult physical activity. *American journal of preventive*  
17 *medicine* 1987;3(5):276-81.
- 18 10. Kirby A, Edwards L, Sugden D, Rosenblum S. The development and standardization of  
19 the Adult Developmental Co-ordination Disorders/Dyspraxia Checklist (ADC).  
20 *Research in Developmental Disabilities* 2010;31(1):131-39.
- 21 11. Heymsfield SB, Thomas D, Bosy-Westphal A, Shen W, Peterson CM, Muller MJ.  
22 Evolving concepts on adjusting human resting energy expenditure measurements for  
23 body size. *Obes Rev*;13(11):1001-14.
- 24 12. ODI. Disability statistics and research, 2013.
- 25 13. Barnett A, Dawes H, Morris M, Wilmut K, Howells K. Barriers and facilitators to  
26 participation in physical activity in teenagers with Developmental Coordination  
27 Disorder. *British Psychological Society, Developmental Section Annual Conference.*  
28 University of Nottingham & Nottingham Trent University, 2009.
- 29 14. Barnett A, Dawes, H, Wilmut, K. Constraints and facilitators to participation in physical  
30 activity in teenagers with Developmental Co-ordination Disorder: an exploratory  
31 interview study. *Child: Care, Health and Development* 2012.
- 32 15. Buffart LM, Westendorp T, van den Berg-Emons RJ, Stam HJ, Roebroek ME. Perceived  
33 barriers to and facilitators of physical activity in young adults with childhood-onset  
34 physical disabilities. *J Rehabil Med* 2009;41(11):881-5.
- 35 16. Rejeski W. Not what, but how one feels: the measurement of affect during exercise.  
36 *Journal of Sport & Exercise Psychology* 1989;11:304-17.
- 37 17. Weiser PC, and Stamper, D.A. Psychophysiological interactions leading to increased  
38 effort, leg fatigue, and respiratory distress during prolonged strenuous bicycle riding.  
39 In: Borg G, editor. *Physical Work and Effort*. Oxford: Pergamon Press, 1977.
- 40 18. Cairney J, Hay JA, Wade TJ, Faught BE, Flouris A. Developmental coordination disorder  
41 and aerobic fitness: Is it all in their heads or is measurement still the problem?  
42 *American Journal of Human Biology* 2006;18(1):66-70.
- 43 19. Schott N, Alof V, Hultsch D, Meermann D. Physical fitness in children with  
44 developmental coordination disorder. *Research quarterly for exercise and sport*  
45 2007;78(5):438-50.
- 46 20. Chia LC, Guelfi KJ, Licari MK. A comparison of the oxygen cost of locomotion in  
47 children with and without developmental coordination disorder. *Developmental*  
48 *medicine and child neurology* 2009;52(3):251-55.
- 49 21. Wu SK, Lin HH, Li YC, Tsai CL, Cairney J. Cardiopulmonary fitness and endurance in  
50 children with developmental coordination disorder. *Research in developmental*  
51 *disabilities* 2009;31(2):345-9.
- 52 22. Henderson SE, Sugden DA, Barnett A. *Movement Assessment Battery for Children 2*  
53 *Checklist*. London: Pearson, 2007.
- 54 23. Sugden D. *Developmental Coordination Disorder as a Specific Learning Difficulty. Leeds*  
55 *Consensus Statement*. Cardiff: The Dyscovery Trust, 2006.

- 1  
2  
3 1 24. Godfrey S, Davies CT, Wozniak E, Barnes CA. Cardio-respiratory response to exercise in  
4 2 normal children. *Clinical science* 1971;40(5):419-31.  
5 3 25. Ziemann U, Ishii K, Borgheresi A, Yaseen Z, Battaglia F, Hallett M, et al. Dissociation of  
6 4 the pathways mediating ipsilateral and contralateral motor-evoked potentials in  
7 5 human hand and arm muscles. *J Physiol* 1999;518 ( Pt 3):895-906.  
8 6 26. Parfitt G, Shepherd P, Eston R. Reliability of effort production using the children's  
9 7 CALER and BABE perceived exertion scales. *Journal of Exercise Science and*  
10 8 *Fitness* 2007;5:49-55.  
11 9 27. Winter EM. *Sport and exercise physiology testing guidelines : the British Association of*  
12 10 *Sport and Exercise Sciences guide*. London: Routledge, 2007.  
13 11 28. Armstrong N, Welsman JR, Kirby BJ. Peak oxygen uptake and maturation in 12-yr olds.  
14 12 *Medicine and science in sports and exercise* 1998;30(1):165-9.  
15 13 29. Wolfe RR. The underappreciated role of muscle in health and disease. *Am J Clin Nutr*  
16 14 2006;84(3):475-82.  
17 15 30. Hansen JE, Casaburi R, Cooper DM, Wasserman K. Oxygen uptake as related to work  
18 16 rate increment during cycle ergometer exercise. *European journal of applied*  
19 17 *physiology and occupational physiology* 1988;57(2):140-5.  
20 18 31. Wasserman K, Sietsema K, Sue, D.Y, Stringer, W.W, Sun, X.G and Whipp, B.J.  
21 19 *Principles Of Exercise Testing & Interpretation: Including Pathophysiology And*  
22 20 *Clinical Applications*. 5th ed: Lippincott Williams and Wilkins., 2011.  
23 21 32. Schott N, Alof V, Hultsch D, Meermann D. Physical fitness in children with  
24 22 developmental coordination disorder. *Research Quarterly for Exercise and Sport*  
25 23 2007;78(5):438-50.  
26 24 33. Ruiz JR, Ortega FB, Rizzo NS, Villa I, Hurtig-Wennlof A, Oja L, et al. High  
27 25 cardiovascular fitness is associated with low metabolic risk score in children: the  
28 26 European Youth Heart Study. *Pediatric research* 2007;61(3):350-5.  
29 27 34. Anderssen SA, Cooper AR, Riddoch C, Sardinha LB, Harro M, Brage S, et al. Low  
30 28 cardiorespiratory fitness is a strong predictor for clustering of cardiovascular disease  
31 29 risk factors in children independent of country, age and sex. *Eur J Cardiovasc Prev*  
32 30 *Rehabil* 2007;14(4):526-31.  
33 31 35. Karila C, De Blic J, Waernessyckle S. Cardiopulmonary Exercise Testing in Children. An  
34 32 Individualized Protocol for Workload Increase. *Chest* 2001;120:81-87  
35 33 36. Buys R, Budts W, Reybrouck T, Gewillig M, Vanhees L. Serial exercise testing in  
36 34 children, adolescents and young adults with Senning repair for transposition of the  
37 35 great arteries. *BMC Cardiovasc Disord* 2012;12:88.  
38 36 37. ACSM. *ACSM's Guidelines For Exercise Testing And Prescription. Guidelines for graded*  
39 37 *exercise testing and training*. 7  
40 38 ed. Philadelphia: Lea and Febiger: Lippincott Williams and Wilkins, 2005.  
41 39 38. Riddell MC, Jammik VK, Iscoe KE, Timmons BW, Gledhill N. Fat oxidation rate and the  
42 40 exercise intensity that elicits maximal fat oxidation decreases with pubertal status in  
43 41 young male subjects. *J Appl Physiol* 2008;105(2):742-8.  
44 42 39. Verschuren O, Ketelaar M, Takken T, Helder PJ, Gorter JW. Exercise programs for  
45 43 children with cerebral palsy: a systematic review of the literature. *Am J Phys Med*  
46 44 *Rehabil* 2008;87(5):404-17.  
47 45 40. Raynor AJ. Strength, power, and coactivation in children with developmental  
48 46 coordination disorder. *Dev Med Child Neurol* 2001;43(10):676-84.  
49 47 41. Buchan DS, Ollis S, Thomas NE, Buchanan N, Cooper SM, Malina RM, et al. Physical  
50 48 activity interventions: effects of duration and intensity. *Scandinavian Journal of*  
51 49 *Medicine & Science in Sports* 2011;21(6):E341-E50.  
52 50 42. Hung WWY, Pang M. Y. C. Effects of group-based versus individual-based exercise  
53 51 training on motor performance in children with developmental coordination  
54 52 disorder: a randomized controlled pilot study. *Journal of Rehabilitation Medicine*  
55 53 2010;42:122-28.  
56 54  
57 54  
58 55  
59  
60

1  
2  
3 1  
4  
5 2  
6  
7 3  
8  
9 4  
10  
11 5  
12  
13 6  
14  
15 7  
16  
17 8  
18  
19 9  
20  
21 10  
22  
23 11  
24  
25 12  
26  
27 13  
28  
29 14  
30  
31 15  
32  
33 16  
34  
35 17  
36  
37 18  
38  
39 19  
40  
41 20  
42  
43 21  
44  
45 22  
46  
47 23  
48  
49 24  
50  
51 25  
52  
53 26  
54  
55 27  
56  
57 28  
58  
59 29  
60

#### Article Focus

- Exercise tolerance was not limited by the HMI group not willing to push themselves maximally, with the level of motor impairment significantly related to  $VO_2$  peak and muscular strength.
- Children with HMI have a reduced movement economy during cycling exercise.

#### Key Messages

- Children with high motor impairment fail to exercise hard enough to maximally tax the cardiovascular system.
- Children with HMI are willing to push themselves maximally during exercise, despite limited exercise capacity. Utilising short duration, high intensity exercise bouts, focusing on the development of the exercising musculature, may be a better method for improving the limited fitness parameters in this population.

#### Strengths and Limitations

- Few studies have directly measured limiting factors to exercise alongside standard motor impairment tests.
- The use of cycle ergometry is a safe option for maximal testing, allowing participants to give a maximal effort. However, due to the nature of the exercise, the weakness in the exercising musculature may be accentuated.

1  
2  
3  
4  
5  
6  
7  
8  
9  
10  
11  
12  
13  
14  
15  
16  
17  
18  
19  
20  
21  
22  
23  
24  
25  
26  
27  
28  
29  
30  
31  
32  
33  
34  
35  
36  
37  
38  
39  
40  
41  
42  
43  
44  
45  
46  
47  
48  
49  
50  
51  
52  
53  
54  
55  
56  
57  
58  
59  
60

1

For peer review only

Table 1. Participant characteristics and outcome measures.

|                                  | HMI (n=18)  | NMI (n=17)   |
|----------------------------------|-------------|--------------|
| M-ABC                            | 4.0 (4.7)   | 62.8 (20.7)* |
| Age (yrs)                        | 14.1 (1.5)  | 14.9 (0.9)   |
| Height (m)                       | 1.70 (0.10) | 1.74 (0.10)  |
| Weight (kg)                      | 62.8 (17.9) | 60.3 (10.6)  |
| BMI                              | 21.5 (4.0)  | 19.5 (2.1)   |
| VO <sub>2</sub> max (ml.kg.min)  | 34.9 (6.3)  | 48.5 (7.9)*  |
| VO <sub>2</sub> /Workload (ml.W) | 12.5 (3.9)  | 10.0 (1.3)*  |
| O <sub>2</sub> Pulse (ml.beat)   | 12.1 (3.7)  | 15.9 (4.0)*  |
| Heart Rate max. (beats.min)      | 176 (19.7)  | 188 (8.8)*   |
| RER max.                         | 1.15 (0.09) | 1.18 (0.09)  |
| RPE max.                         | 9.1 (1.5)   | 9.6 (0.5)    |

Table 2. M-ABC and MVIC for the HMI and NMI participants.

|              | HMI (n=10) | NMI (n=10)   |
|--------------|------------|--------------|
| M-ABC        | 4.3 (5.4)  | 68.6 (19.9)* |
| MVIC (Nm.kg) | 5.7 (1.0)  | 9.0 (1.8)*   |

For peer review only

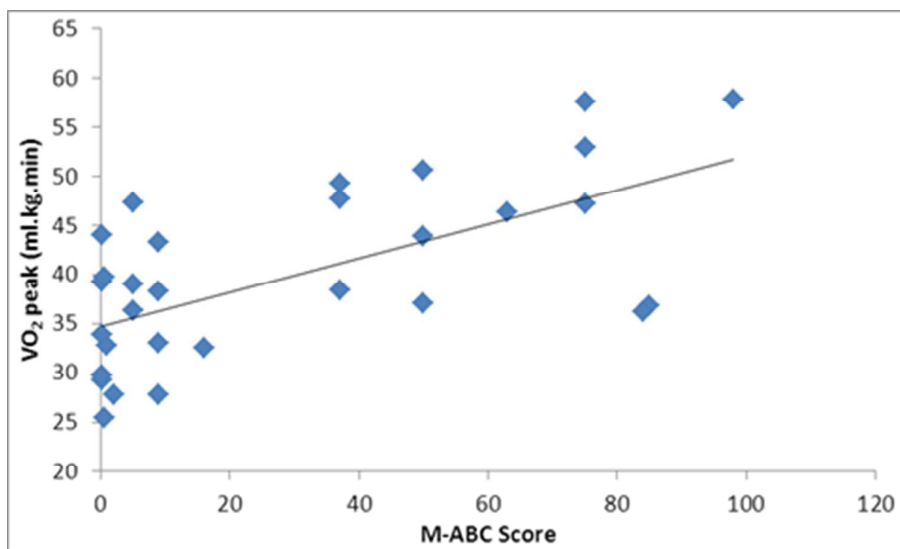

Figure 1. Relationship between M-ABC score and  $\dot{V}O_2$  peak.

Peer review only

1  
2  
3  
4  
5  
6  
7  
8  
9  
10  
11  
12  
13  
14  
15  
16  
17  
18  
19  
20  
21  
22  
23  
24  
25  
26  
27  
28  
29  
30  
31  
32  
33  
34  
35  
36  
37  
38  
39  
40  
41  
42  
43  
44  
45  
46  
47  
48  
49  
50  
51  
52  
53  
54  
55  
56  
57  
58  
59  
60

1  
2  
3  
4  
5  
6  
7  
8  
9  
10  
11  
12  
13  
14  
15  
16  
17  
18  
19  
20  
21  
22  
23  
24  
25  
26  
27  
28  
29  
30  
31  
32  
33  
34  
35  
36  
37  
38  
39  
40  
41  
42  
43  
44  
45  
46  
47  
48  
49  
50  
51  
52  
53  
54  
55  
56  
57  
58  
59  
60

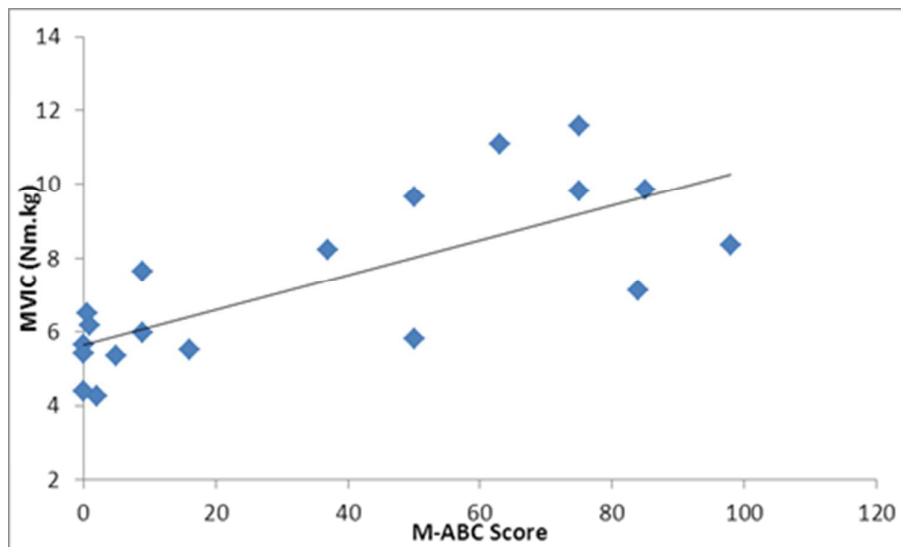

Figure 2. Relationship between M-ABC score and MVIC.

Peer review only
